# Supplementary material for: Discrimination between cyclic nucleotides in a cyclic nucleotide-gated ion channel
Source: Springer Nature journal article supplement (doi:10.1038/s41594-023-00955-3), 2023-03-27
Supplement: MOESM1 [file 41594_2023_955_MOESM1_ESM.pdf › 41594_2023_955_MOESM1_ESM.pdf]

---

# Discrimination between cyclic nucleotides in a cyclic nucleotide-gated ion channel

---

In the format provided by the  
authors and unedited

## Discrimination between cyclic-nucleotides in a cyclic-nucleotide gated ion channel

Yangang Pan<sup>1</sup>, Emmi Pohjolainen<sup>2</sup>, Philipp A M Schmidpeter<sup>1</sup>, Andrea C Vaiana<sup>2,#</sup>,  
Crina M Nimigean<sup>1,3</sup>, Helmut Grubmüller<sup>2</sup>, Simon Scheuring<sup>1,3,\*</sup>

<sup>1</sup> Department of Anesthesiology, Weill Cornell Medical College, 1300 York Ave, New York, NY 10065, USA

<sup>2</sup> Max Planck Institute for Multidisciplinary Sciences, Theoretical and Computational Biophysics Department, Am Fassberg  
11, 37077 Goettingen, Germany

<sup>3</sup> Department of Physiology & Biophysics, Weill Cornell Medical College, 1300 York Ave, New York, NY 10065, USA

<sup>#</sup> Current address: Institute of Biophysics, National Research Council, Palermo 90146, Italy

\* Correspondence should be addressed to: [sis2019@med.cornell.edu](mailto:sis2019@med.cornell.edu)

### Supplementary Information

**Table S1)**

| Method (DHS fit)                                | cN   | $k_{off}(1/s)$ | $x_{\beta}$ (nm) | $\Delta G$ (k <sub>B</sub> T) |
|-------------------------------------------------|------|----------------|------------------|-------------------------------|
| <b>20ms bond formation time</b>                 | cAMP | $1.2 \pm 0.4$  | $0.48 \pm 0.08$  | $10.4 \pm 1.7$                |
| <b>20ms bond formation time</b>                 | cGMP | $1.6 \pm 0.3$  | $0.69 \pm 0.05$  | $9.2 \pm 1.3$                 |
| <b>1000ms bond formation time: State 1 bond</b> | cAMP | $1.1 \pm 0.4$  | $0.57 \pm 0.07$  | $9.7 \pm 1.5$                 |
| <b>1000ms bond formation time: State 2 bond</b> | cAMP | $0.5 \pm 0.2$  | $0.48 \pm 0.08$  | $10.9 \pm 2.0$                |

**Table S1)** cN-CNBD binding kinetics fit parameter from using the DHS model.
