# Supplementary material for: Discrimination between cyclic nucleotides in a cyclic nucleotide-gated ion channel
Source: Springer Nature journal article supplement (doi:10.1038/s41594-023-00955-3), 2023-03-27
Supplement: MOESM3 [file 41594_2023_955_MOESM3_ESM.pdf › 41594_2023_955_MOESM3_ESM.pdf]

## Peer Review Information

---

**Journal:** Nature Structural & Molecular Biology

**Manuscript Title:** Discrimination between cyclic-nucleotides in a cyclic-nucleotide gated ion channel

**Corresponding author name(s):** Simon Scheuring

## Reviewer Comments & Decisions:

|                                          |
|------------------------------------------|
| <b>Decision Letter, initial version:</b> |
|------------------------------------------|

**Message:** 24th Oct 2022

Dear Simon,

Thank you again for submitting your manuscript "Discrimination between cyclic-nucleotides in a cyclic-nucleotide gated ion channel". I apologize for the delay in responding, which (as you know) resulted from the difficulty in obtaining suitable referee reports. Nevertheless, we now have comments (below) from the 2 reviewers who evaluated your paper. In light of those reports, we remain interested in your study and would like to see your response to the comments of the referees, in the form of a revised manuscript. Please be sure to address/respond to all concerns of the referees in full in a point-by-point response and highlight all changes in the revised manuscript text file.

We appreciate the requested revisions are potentially extensive. We thus expect to see your revised manuscript within 6 months. If you cannot send it within this time, please let us know. We will be happy to consider your revision as long as nothing similar has been accepted for publication at NSMB or published elsewhere. Should your manuscript be substantially delayed without notifying us in advance and your article is eventually published, the received date would be that of the revised, not the original, version.

We are committed to providing a fair and constructive peer-review process. Do not hesitate to contact us if there are specific requests from the reviewers that you believe are technically impossible or unlikely to yield a meaningful outcome.

As you already know, we put great emphasis on ensuring that the methods and statistics reported in our papers are correct and accurate. As such, if there are any changes that should be reported, please submit an updated version of the Reporting Summary along with your revision.

Reporting Summary:

<https://www.nature.com/documents/nr-reporting-summary.pdf>

Please note that the form is a dynamic 'smart pdf' and must therefore be downloaded and completed in Adobe Reader.

When submitting the revised version of your manuscript, please pay close attention to our [Digital Image Integrity Guidelines](https://www.nature.com/nature-portfolio/editorial-policies/image-integrity).

Finally, please ensure that you retain unprocessed data and metadata files after publication, ideally archiving data in perpetuity, as these may be requested during the peer review and production process or after publication if any issues arise.

**SOURCE DATA:** we urge authors to provide, in tabular form, the data underlying the graphical representations used in figures. This is to further increase transparency in data reporting, as detailed in this editorial (<http://www.nature.com/nsmb/journal/v22/n10/full/nsmb.3110.html>). Spreadsheets can be submitted in excel format. Only one (1) file per figure is permitted; thus, for multi-paneled figures, the source data for each panel should be clearly labeled in the Excel file; alternately the data can be provided as multiple, clearly labeled sheets in an Excel file. When submitting files, the title field should indicate which figure the source data pertains to. We encourage our authors to provide source data at the revision stage, so that they are part of the peer-review process.

While we encourage the use of color in preparing figures, please note that this will incur a charge to partially defray the cost of printing. Information about color charges can be found at <http://www.nature.com/nsmb/authors/submit/index.html#costs>

We require deposition of coordinates (and, in the case of crystal structures, structure factors) into the Protein Data Bank with the designation of immediate release upon publication (HPUB). Electron microscopy-derived density maps and coordinate data must be deposited in EMDB and released upon publication. Deposition and immediate release of NMR chemical shift assignments are highly encouraged. Deposition of deep sequencing and microarray data is mandatory, and the datasets must be released prior to or upon publication. To avoid delays in publication, dataset accession numbers must be supplied with the final accepted manuscript and appropriate release dates must be indicated at the galley proof stage. Please find the complete NRG policies on data availability at <http://www.nature.com/authors/policies/availability.html>.

Nature Structural & Molecular Biology is committed to improving transparency in authorship. As part of our efforts in this direction, we are now requesting that all authors identified as 'corresponding author' on published papers create and link their Open Researcher and Contributor Identifier (ORCID) with their account on the Manuscript Tracking System (MTS), prior to acceptance. This applies to primary research papers only. ORCID helps the scientific community achieve unambiguous attribution of all scholarly contributions. You can create and link your ORCID from the home page of the MTS by clicking on 'Modify my Springer Nature account'. For more information please visit [www.springernature.com/orcid](http://www.springernature.com/orcid).

Please use the link below to submit your revised manuscript and related files:

[Redacted]

**Note:** This URL links to your confidential home page and associated information about manuscripts you may have submitted, or that you are reviewing for us. If you wish to forward this email to co-authors, please delete the link to your homepage.

We look forward to seeing the revised manuscript and thank you for the opportunity to review your work.

Kind regards,  
Florian

Dr Florian Ullrich  
Associate Editor, Nature  
Consulting Editor, Nature Structural & Molecular Biology  
ORCID 0000-0002-1153-2040

Referee expertise:

Referee #1: AFM

Referee #2: CNG channels, MD simulations

Reviewers' Comments:

Reviewer #1:

Remarks to the Author:

The manuscript utilizes AFM-based SMFS and MDS to identify that cAMP binds to SThK NBD stronger than cGMP and employs a deep binding state.

The authors developed a careful protocol for establishing well defined SThK 2-D crystals and used AFM tip chemistry from the literature to attach cAMP and cGMP to AFM tips through flexible linkers. SMFS carried out in their studies appears to be technically sound, although block experiments are required to proof specificity. If specific, injection of nucleotides or SthK should lead to abolishment of binding.

More details of the data must be presented to verify the deep binding state of cAMP. The AFM tip chemistry used does not strictly show only single molecular interactions. Dual, or even more, ruptures can occur, appearing simultaneously or sequentially. At the current stage of data presentation, it cannot be excluded that the high forces of cAMP arise from a double bond rupture, in particular as the binding probability of cAMP is generally higher than that of cGMP and increase of contact time increases the probability of multiple bond formation. To be more convincing, a statistical analysis of multiple bond ruptures in dependence of the contact time (at least for 0.02 and 1 s) both for both cAMP and cGMP must be shown. Another convincing argument is to verify that the higher forces of cAMP do not follow the Williams Markovian model for simultaneous dual bond rupture.

Other points:

The authors are not consistent in using the terms pulling velocity and loading rate. In fact, they vary z-velocity and calculate loading rate, for which error bars for fitting and

presentation should be included.

Another question is, whether the Bell-Evans is model a good model for MDS. In any case, it does not make sense to fit the SMFS and MDS data together with the Bell-Evans model. The loading rates are way too far apart and the fit results of the SMFS and MDS data alone are completely different.

Reviewer #2:

Remarks to the Author:

In this manuscript, the authors probe the differences in cAMP and cGMP binding to the cyclic-nucleotide-gated ion channels using single-molecule force spectroscopy. Electrophysiological studies show that saturating amounts of cAMP activates about 20 to 40% of SthK channels whereas cGMP activates only 0.01% of the channels. Thus, cGMP is an antagonist or an extremely weak partial agonist. X-ray structures of the isolated SthK CNBD in presence of cGMP and cAMP have show that the the central cavity is cAMP bound structure is more open compared to cGMP bound structure (Kesters et. al. PLOS One 10, e0116369, 2015). Using ligands tethered to AFM tip, the authors conduct force spectroscopy studies to probe mainly the cGMP and cAMP unbinding reaction on isolated SthK CNBD. They find that the cAMP unbinds from a deep pocket which is not accessible to cGMP. They suggest that the cAMP binding leads to conformational change which does not occur in the presence cGMP. Their experimental finding was further supported by the molecular dynamics simulation study, which not only enables access to force loading regime beyond the experimental range but also provides a structural view of the unbinding reaction.

Force spectroscopy has been previously used to study both covalent and non-covalent interactions like binding reactions. To the best of our knowledge, this is the first study to examine cAMP-CNBD binding reaction. The authors have wisely decided to focus on the isolated CNBD domain so as not to complicate things. The results are interesting but there are number of issues that need to be addressed.

Key concerns:

1. cAMP and cGMP can exist in both syn and anti configuration but the activated bound state prefers one or the other configuration. The distribution between the two states can be altered by substitutions in the purine ring. Given that the position of the attachment site for the tether is different for cGMP and cAMP, how can one rule out the observed differences in binding modes are not due to the differences in the attachment site.
2. The other question here is whether surface immobilization of the CNBD domain alters the affinity to the cAMP and cGMP. The authors estimate the affinity for cAMP is two fold more than for cGMP. How does this compare with binding affinity measurements in freely diffusing CNBD domains?
3. Is the binding of tethered ligand cGMP and cAMP specific? For instance, it is possible that some of the binding may be non-specific attachment. Can they show that the binding can be competed out in presence of ligands in solution?
4. In calculating the binding probability, the authors only considered the CNBD population density, but the density of the ligands on the AFM tip can also contribute directly to determining the bound probability. How do the authors make sure that the ligand density is the same when they switch from cAMP tip to cGMP tip?
5. Figure 5b shows a relatively broad distribution of the unbinding force. According to the authors, this indicates cAMP binds to the CNBDs in two different states, one in a loosely bound state and the other in a tightly bound state. How do the authors rule out the

unbinding of multi valence state, where multiple ligands bind to different CNBDs within the tetramer? To what extent the ligand population on the AFM tip was controlled to rule out such possibility?

6. In Figure 3b and 3f, the rupture force histograms for cGMP and cAMP appear similar within margin of error. This is further reflected in Figure 3i where the experimental cGMP and cAMP are not very different. The difference is between 5-10 pN. Considering the force constant of the cantilever is 100 pN/nm, how can the authors claim that this small change is significant?

7. In this study, the authors used NTA-Ni<sup>2+</sup>-His6 link to immobilize the CNBDs on the lipid bilayer. The unbinding force related to Tris NTA- Ni<sup>2+</sup>-His6 is about 60-80 pN (Koehler, Melanie, et al. Nano letters 20.5 (2020): 4038-4042) considering all the histidine is bound, the unbinding force is still relatively lower than typical tethering systems used in a force spectroscopy experiment i.e. biotin-streptavidin. Is it possible that the NTA-Ni<sup>2+</sup>-His6 bond breaks before the cAMP-CNBD linkage especially when the polyvalency is not established i.e. all six imidazoles are not bound to NTA?

8. Cyclic nucleotide binding to SthK channels has been investigated by multiple labs. Cryo-EM studies of the full length channels show that the cAMP and cGMP bound SthK structures are identical but X-ray structures of the isolated SthK CNBDs in presence of cAMP and cGMP shows clear differences between the two agonists. The authors dismissed this data by stating that (line 53, Pg. 2) the two structures are "quasi-identical" which is not correct. Please discuss your data in light of these published facts.

Additional comments:

1. The resolution of Figure 1b & 1c could be improved.
2. Figure 1d should include the dashed line along which the cross section 1 is plotted.
3. In the Figure 2b the contact time should be labeled from the beginning of 2 (red line) until the end of 4 (blue line). Black line 3 is shorter than the actual contact time.
4. The authors used the popular Bell-Evans model to fit the dynamic force spectroscopy data. Bell-Evans fitting gives the ability to calculate off rate constant ( $k_{off}$ ), distance to the transition state ( $x\beta$ ) as well as TS barrier height ( $\Delta G$ ). The authors may want to report the  $\Delta G$  for both unbinding experiments (cAMP vs cGMP) and a comparison of the  $\Delta G$  values can be given for a better understanding to readers.
5. Figure 3e should also include an inset showing the zoomed-in region of the unbinding force curve.

#### Author Rebuttal to Initial comments

#### Reviewers' Comments:

#### REVIEWER #1

Remarks to the Author:

**Comment 1:** The manuscript utilizes AFM-based SMFS and MDS to identify that cAMP binds to SThK NBD stronger than cGMP and employs a deep binding state.

The authors developed a careful protocol for establishing well defined SThK 2-D crystals and used AFM tip chemistry from the literature to attach cAMP and cGMP to AFM tips through flexible linkers. SMFS carried out in their studies appears to be technically sound, although block experiments are required to proof specificity. If specific, injection of nucleotides or SthK should lead to abolishment of binding.

**Response 1:** We thank for the reviewer for their overall positive assessment of our work.

Regarding the blocking experiments: We of course agree with the reviewer. Indeed, we did perform block experiments by injecting saturating concentrations of either cAMP or cGMP (2mM, Philipp A.M. Schmidpeter et al., J Gen Physiol. 2018, 150, 821-834) to the fluid cell and performed the same type of SMFS experiments. The frequency of unbinding events decreased dramatically in these control experiments, indicating that the analyzed unbinding events were indeed specific. Accordingly, we amended the revised version of our manuscript, lines 120-124, lines 145 – 147, and novel figure panel Figure 2c.

**Comment 2:** More details of the data must be presented to verify the deep binding state of cAMP. The AFM tip chemistry used does not strictly show only single molecular interactions. Dual, or even more, ruptures can occur, appearing simultaneously or sequentially. At the current stage of data presentation, it cannot be excluded that the high forces of cAMP arise from a double bond rupture, in particular as the binding probability of cAMP is generally higher than that of cGMP and increase of contact time increases the probability of multiple bond formation. To be more convincing, a statistical analysis of multiple bond ruptures in dependence of the contact time (at least for 0.02 and 1 s) both for both cAMP and cGMP must be shown. Another convincing argument is to verify that the higher forces of cAMP do not follow the Williams Markovian model for simultaneous dual bond rupture.

**Response 2:** We thank the reviewer for their excellent and constructive suggestions. Indeed, we find in our data curves with multiple rupture events. As the reviewer points out, multiple rupture events increased with increasing contact time for both cNs, as expected. In revision, we provide a new Figure S1 reporting about the force-distance curves that revealed multiple rupture bonds.

However, as the reviewer points out, multiple bonds could also rupture simultaneously.

Regarding this, we note that only cAMP revealed a higher force peak, and not cGMP. As we find a similar frequency of occurrence of sequential multiple bonds for both cNs, it seems highly unlikely that cAMP would only produce simultaneous ruptures. Therefore, the higher force unbinding event of cAMP should indeed arise from a different binding mode. Further, if the higher forces of cAMP would arise from simultaneous multiple bond ruptures, the frequency of simultaneous multiple bond rupture events should increase with increasing loading rate (Boris B. Akhremitchev et al., Biophys. J. 2008, 95, 3964–3976). This is not the case (Figure S3b).

Finally, we followed the reviewer's suggestion and applied the Williams Markovian model to test whether the higher forces could be due to simultaneous double bond ruptures or not. We

found that the experimental dynamic force spectrum of cAMP did not agree well with the Williams Markovian model for simultaneous dual bond rupture (Figure S5). All these analyses are in favor of an interpretation that the higher force rupture events indeed arose from a second, deeper binding mode and not from simultaneous multiple bond ruptures. Along with new Figures S1 and S5, we revised our manuscript in lines 291–302, lines 504–508.

#### Other points:

**Comment 3:** The authors are not consistent in using the terms pulling velocity and loading rate. In fact, they vary z-velocity and calculate loading rate, for which error bars for fitting and presentation should be included.

**Response 3:** We thank the reviewer for this suggestion. In the revision, we added the error bars of the loading rate for fitting (Figure 3i).

**Comment 4:** Another question is, whether the Bell-Evans is model a good model for MDS. In any case, it does not make sense to fit the SMFS and MDS data together with the Bell-Evans model. The loading rates are way too far apart and the fit results of the SMFS and MDS data alone are completely different.

**Response 4:** We agree with the reviewer that the unbinding rates  $k_{off}$ , obtained from the Bell-Evans fit results to the AFM and MDS data individually differ, as reported in Table 1, by 1-2 orders of magnitude. Note, however, that to determine  $k_{off}$  values from the fits to the MDS rupture forces alone implies as quite bold extrapolation over 6 orders of magnitude, as also reflected by the large error bars in Table 1, such that we do not think this seemingly large difference is actually a matter of concern. Note also that the obtained rupture lengths, which do not require such extrapolation, agree very well within experimental error. Importantly, our claim that the MD simulations pass the test against the AFM experiment does not at all rest on whether or not a Bell-Evans fit to the combined rupture forces 'makes sense' - but solely rests on the individual measured and/or computed rupture forces in Figure 3i, which show the same trend for both cGMP and cAMP and, hence, reflect the difference the MD simulations seek to explain. The three different Bell-Evans fits for each case are shown in this Figure 3i to guide the eye and enable to better judge this agreement. Finally, looking at Figure 3i, we would tend to say that such a simple fit seems to describe the data surprisingly well for the system at hand, which is why we think, as described in the text, that a fit to the merged data can provide a more accurate estimate for the off-rates. None of our conclusions rest on that notion, though. Interestingly, comparison to our previous study of streptavidin/biotin unbinding (Rico et al, *PNAS*, 2019, 116, 6594-6601) shows that such a log-linear behavior does not always shows up, such that, in contrast to here, a more advanced fit was required (essentially showing that MDS are also capable of producing more complex behavior of more complex unbinding energy landscapes). We added in revision an according remark in the caption of Figure 3.



**REVIEWER #2**

## Remarks to the Author:

In this manuscript, the authors probe the differences in cAMP and cGMP binding to the cyclic-nucleotide-gated ion channels using single-molecule force spectroscopy. Electrophysiological studies show that saturating amounts of cAMP activates about 20 to 40% of SthK channels whereas cGMP activates only 0.01% of the channels. Thus, cGMP is an antagonist or an extremely weak partial agonist. X-ray structures of the isolated SthK CNBD in presence of cGMP and cAMP have show that the the central cavity is cAMP bound structure is more open compared to cGMP bound structure (Kesters et. al. PLOS One 10, e0116369, 2015). Using ligands tethered to AFM tip, the authors conduct force spectroscopy studies to probe mainly the cGMP and cAMP unbinding reaction on isolated SthK CNBD. They find that the cAMP unbinds from a deep pocket which is not accessible to cGMP. They suggest that the cAMP binding leads to conformational change which does not occur in the presence cGMP. Their experimental finding was further supported by the molecular dynamics simulation study, which not only enables access to force loading regime beyond the experimental range but also provides a structural view of the unbinding reaction.

Force spectroscopy has been previously used to study both covalent and non-covalent interactions like binding reactions. To the best of our knowledge, this is the first study to examine cAMP-CNBD binding reaction. The authors have wisely decided to focus on the isolated CNBD domain so as not to complicate things. The results are interesting but there are number of issues that need to be addressed.

Response: We thank the reviewer for their positive general reception of our work. We have amended our manuscript according to reviewer's recommendations and hope to address all the reviewer's issues satisfactorily.

## Key concerns:

Comment 1: cAMP and cGMP can exist in both syn and anti configuration but the activated bound state prefers one or the other configuration. The distribution between the two states can be altered by substitutions in the purine ring. Given that the position of the attachment site for the tether is different for cGMP and cAMP, how can one rule out the observed differences in binding modes are not due to the differences in the attachment site.

Response: In the X-ray structures SthK CNBDs bind both cAMP and cGMP in anti-configuration (Kesters, et al., PLOS One, 2015, 10, e0116369). The anti-configuration is also the more extended form of the cN, and since the linker is in both cases attached to the amine group of the purine rings, and the phosphate of cAMP and cGMP are deep inside the binding pocket, the attachment should not significantly influence the conformer, nor should pulling on the purine ring bias it towards the syn-configuration. In the MD simulations we have taken care to make sure the experimental linker attachment is also accurately reflected. Triggered by the reviewer's



comment, we have now analyzed our simulations in detail with respect to syn-/anti-conformations. Indeed, during the pulling simulations, up to 0.5 nm center of mass distance (which is where the h-bonds most markedly distinguish between cAMP and cGMP), no syn conformation is seen; for larger distances, further down the unbinding path, syn conformations appear in only 12% of all frames. Of course, we cannot rule out that the linker attachment somehow contributes to the observed difference in unbinding forces. However, cAMP and cGMP show readily different binding energetics (h-bond strengths) within the binding pocket, where the attachment mode should play a minor role. We have changed the text in the discussion such as to make this point clearer and now also mention that the attachment modes may also play a role (lines 349-357).

**Comment 2:** The other question here is whether surface immobilization of the CNBD domain alters the affinity to the cAMP and cGMP. The authors estimate the affinity for cAMP is two fold more than for cGMP. How does this compare with binding affinity measurements in freely diffusing CNBD domains?

**Response 2:** The reviewer is concerned about the effect of the CNBD immobilization on the binding affinity. In our work, the immobilization of the CNBDs is actually very soft, *i.e.* we use a His6-tag to immobilize a His6-C-linker-CNBD construct. This His6-tag should readily provide some degree of flexibility, and the presence of the C-linker further distances the CNBD from the binding-site. In addition, we used a ‘soft surface’, *i.e.* a lipid bilayer to mimic the native environment and orientation of the C-linker-CNBD (see Figure 1c). Thus, overall, we think that our immobilization method is quasi ideal and might represent a more native situation for a ion channel CNBD as compared to floating in bulk. Furthermore, we address here a comparison between cAMP and cGMP binding, and the immobilization conditions are consistent throughout our entire experiments with both cNs. Overall, we conclude that our method is beneficial for investigating and comparing the kinetics of cAMP-CNBD and cGMP-CNBD. Anyway, for comparison, we measured the binding kinetics between the CNBD and cNs in bulk by performing microscale thermophoresis (MST) experiments. Two binding curves were detected for cAMP-CNBD measurements. The first curve had a  $K_D$  value of  $0.4 \pm 0.5 \mu\text{M}$ , and the second curve had a  $K_D$  value of  $1.6 \pm 1.1 \mu\text{M}$  (new Figure S2a,b). The  $K_D$  value of cGMP-CNBD is  $3.3 \pm 1.8 \mu\text{M}$  (new Figure S2c,d). These results are in line with the affinity of the full length channel has been determined as  $0.6 \mu\text{M}$  for cAMP and  $2.7 \mu\text{M}$  for cGMP (Schmidpeter *et al.* JGP 2018, 150, 821-834.). However, these measurements were performed in bulk. Thus, while the tendency is the same as in our experiments, it is difficult to quantitatively compare these results (lines 201-208).

**Comment 3:** Is the binding of tethered ligand cGMP and cAMP specific? For instance, it is possible that some of the binding may be non-specific attachment. Can they show that the binding can be competed out in presence of ligands in solution?

**Response 3:** We thank the reviewer for pointing out the missing report of this standard control. The correctly oriented membrane-binding of the CNBDs in our experimental setup should

significantly reduce unspecific interactions between the ligand and protein and/or surface. In addition, we now present control experiments proving the specificity of binding by injecting saturating concentrations of cAMP or cGMP (2mM, Philipp A.M. Schmidpeter et al., J Gen Physiol. 2018, 150, 821-834) into the AFM fluid cell during AFM-SMFS experiments. We found that the frequency of unbinding events decreased by ~85% in these control experiments, new figure panel Figure 2c. We describe these controls in the revised version of our manuscript in lines 120 – 124.

**Comment 4:** In calculating the binding probability, the authors only considered the CNBD population density, but the density of the ligands on the AFM tip can also contribute directly to determining the bound probability. How do the authors make sure that the ligand density is the same when they switch from cAMP tip to cGMP tip?

**Response 4:** We thank the reviewer for this constructive comment. We agree with the reviewer that the density of the ligands on the AFM tip is important, it is integrated as one of the fit parameters in *equation 3*. In our previous fitting,  $m_l A_c$  was set to 1 based on the SMFS measurements at 20 ms contact time that did not reveal dual-unbinding force curves. Upon further reflection (and in response to a comment by reviewer 1), we found that we could make a more precise estimate of the ligand exposure at the tip based on a statistical analysis of multiple bond ruptures as function of the contact time for both, cAMP and cGMP, see new supplementary Figure S1. While we mainly detected single rupture events, upon prolonged tip exposure, we found ~15% double bond rupture events (triple bond rupture events were negligible with relative frequencies <1%). Thus, we set  $m_l A_c$  to 2 and fitted all our data again in an amended Table 1. However, such differences only account for changes in the affinity by a factor <2, and certainly are unrelated to the ~1000-fold difference in the effect of cAMP and cGMP on channel gating. On the other hand, the main finding of our work is that cAMP can enter the deep bound state that is inaccessible to cGMP.

**Comment 5:** Figure 5b shows a relatively broad distribution of the unbinding force. According to the authors, this indicates cAMP binds to the CNBDs in two different states, one in a loosely bound state and the other in a tightly bound state. How do the authors rule out the unbinding of multi valence state, where multiple ligands bind to different CNBDs within the tetramer? To what extent the ligand population on the AFM tip was controlled to rule out such possibility?

**Response 5:** We apologize that we didn't discuss this point thoroughly in the original submission. In our data analysis, we only focused on the single unbinding events. This allowed us to rule out possible sequential unbinding events of multi bond ruptures. However, there is the possibility that multiple bonds rupture happened exactly simultaneously, as the reviewer suggests. We analyzed the occurrence of multiple rupture events as a function of ligand exposure time and found that the multiple rupture events increased with increasing contact time for both cNs (new Figure S1). However, we only found higher force peaks for cAMP, and not for cGMP, though both cNs revealed the same percentage of multiple bindings upon extended exposure. Second, if the higher forces of cAMP would arise from double bond rupture, the frequency of

simultaneous multiple bond rupture should increase with increasing loading rate (Boris B. Akhremitchev et al., Biophysical Journal 2008, 95, 3964–3976). However, this is not the case in our data (Figure S3b). Finally, third, we applied a Markovian model (*eq. 5*), to test whether the higher forces analyzed could originate from double bond ruptures. We found that the measured dynamic force spectra of cAMP did not agree with the Williams Markovian model for simultaneous dual bond rupture (new Figure S5). Considering all these data analyses, we interpret the higher forces to arise from a second, deeper binding mode. Accordingly, we revised our manuscript in lines 291–298, lines 504–508 (along with new figures S1 and S5).

The rupture of multi bonds was tested using the Markovian model:

$$r = k_{off} \frac{k_B T}{x_\beta} \left[ \sum_{n=1}^N \frac{1}{n^2} \exp \left( -\frac{F^* x_\beta}{n k_B T} \right) \right]^{-1} \quad (eq. 5)$$

where  $r$  is the loading rate,  $k_{off}$  and  $x_\beta$  are the parameters derived from the low force Bell-Evans model fit (Figure 5b, gray line),  $N$  is the number of bonds, and  $F^*$  is the most probable unbinding force.

**Comment 6:** In Figure 3b and 3f, the rupture force histograms for cGMP and cAMP appear similar within margin of error. This is further reflected in Figure 3i where the experimental cGMP and cAMP are not very different. The difference is between 5-10 pN. Considering the force constant of the cantilever is 100 pN/nm, how can the authors claim that this small change is significant?

**Response 6:** Of course, the essential part of the force histograms (Figure 3b and f) lies in the repetition of the unbinding experiment over thousands of force-distance cycles, which should result in significant ensemble distributions. Next, the Bell-Evans model is used to fit all the distributions, thus integrating the tendency of all data. Finally, we agree with the reviewer, and it is one of the key findings, that the overall fitting of the experimental data for cAMP and cGMP revealed very similar kinetics, with a  $k_{off}$  of cAMP-CNBD that is only two-fold lower than that of cGMP-CNBD. However, electrophysiology studies showed that cAMP evoked a ~3 orders of magnitude increased activation of SthK as compared to cGMP. Thus, at the end of this paragraph, we put a sentence: ‘But can these rather minor differences alone explain the different action of the two cNs on channel function?’ (lines 172-173). And indeed, we do not think so. We agree that these unbinding characteristics are very similar. This is why we extended our experiments to the force distance cycle with prolonged ligand exposure time (all the data in Figure 3b,f,i represents unbinding forces after 20ms bond formation time). Only in the latter case of extended ligand exposure, we started to see real differences in the behavior of the two cNs.

**Comment 7:** In this study, the authors used NTA-Ni2+-His6 link to immobilize the CNBDs on the lipid bilayer. The unbinding force related to Tris NTA- Ni2+-His6 is about 60-80 pN (Koehler, Melanie, et al. Nano letters 20.5 (2020): 4038-4042) considering all the histidine is bound, the unbinding force is still relatively lower than typical tethering systems used in a force spectroscopy experiment i.e. biotin-streptavidin. Is it possible that the NTA-Ni2+-His6 bond

breaks before the cAMP-CNBD linkage especially when the polyvalency is not established i.e. all six imidazoles are not bound to NTA?

Response 7: We regret that this part was not well explained. The C-linker - CNBD domain is a stable tetramer (see Figure 1), and each C-linker - CNBD domain has thus 4 His6. The unit cell dimension of the C-linker - CNBD tetramer is,  $a = b = 11 \text{ nm}$ ,  $\gamma = 90^\circ$  (thus an area of  $121 \text{ nm}^2$ ) (Figure 1g). The area occupied by one lipid molecule in a supported lipid bilayer is  $\sim 0.25 \text{ nm}^2$  (Takeshi Fukuma et al., ACS nano 2012,6, 9013–9020). This suggest that there are  $\sim 480$  lipid molecules (in each leaflet) under each C-linker – CNBD tetramer. In this work, the membrane contains 20% DGS-NTA- $\text{Ni}^{2+}$ , *i.e.* there are  $\sim 100$  DGS-NTA- $\text{Ni}^{2+}$  lipids under each C-linker – CNBD tetramer, which provides largely sufficient  $\text{Ni}^{2+}$  to allow all the His of all tags to form NTA- $\text{Ni}^{2+}$  bonds. Considering the unbinding force of NTA-  $\text{Ni}^{2+}$ -His6 is 60-80 pN, 4 NTA-  $\text{Ni}^{2+}$ -His6 bonds should immobilize the CNBD domain sufficiently for our measurements (in addition, effects of avidity will emerge from the multiple interactions). We discuss this part more precisely in the revised version of our manuscript lines 455 – 464.

Comment 8: Cyclic nucleotide binding to SthK channels has been investigated by multiple labs. Cryo-EM studies of the full length channels show that the cAMP and cGMP bound SthK structures are identical but X-ray structures of the isolated SthK CNBDs in presence of cAMP and cGMP shows clear differences between the two agonists. The authors dismissed this data by stating that (line 53, Pg. 2) the two structures are “quasi-identical” which is not correct. Please discuss your data in light of these published facts.

Response 8: We thank the reviewer for the suggestion and apologize for the confusing statement. Indeed, to the best of our understanding, in the X-ray structures the C-helices and for that the CNBDs are very similar (Figure R1), and the major conformational changes occurred in the C-linker. The RMSD of the isolated SthK CNBDs between cAMP-bound (4D7T) and cGMP-bound (4D7S) conformations is  $0.979 \text{ \AA}$  (with the main contribution to this RMSD from the C-linker). Accordingly, we amended the text: “The X-ray structures of the cAMP- and cGMP-bound CNBD-C-linker protomers revealed that the CNBDs were very similar, while conformational changes in the C-linker helices occurred. These changes related to the binding of cAMP and cGMP resulted in clear differences in the tetramer assembly, where the cAMP-bound CNBD-C-linker tetramer was in an activated conformation while the cGMP-bound CNBD-C-linker tetramer was in a resting conformation<sup>13</sup>”, lines 52-57.

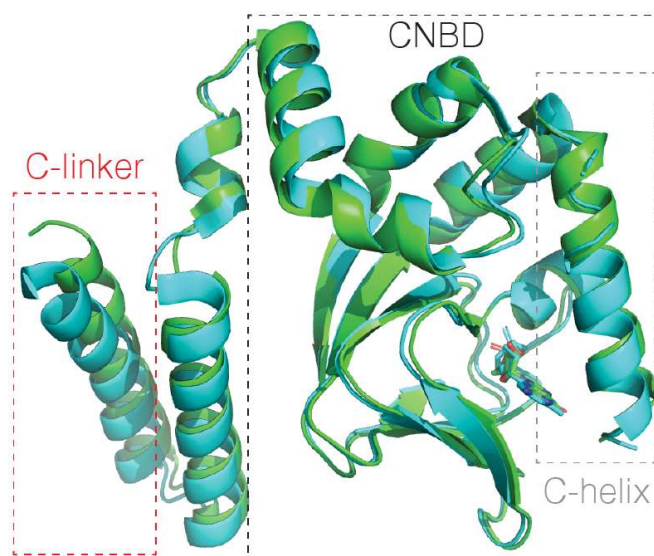

**Figure R1** |. Comparison of isolated SthK CNBDs: cAMP-bound (4D7T, cyan) and cGMP-bound (4D7S, green).

Additional comments:

Comment 1: The resolution of Figure 1b & 1c could be improved.

Response 1: We thank for the reviewer's suggestions. The resolution of Figure 1b & 1c was improved. It is possible that the PDF conversion played bad tricks on our figures...

Comment 2: Figure 1d should include the dashed line along which the cross section 1 is plotted.

Response 2: We thank the reviewer for pointing this. We amended this.

Comment 3: In the Figure 2b the contact time should be labeled from the beginning of 2 (red line) until the end of 4 (blue line). Black line 3 is shorter than the actual contact time.

Response 3: We thank the reviewer for pointing this. We amended it.

Comment 4: The authors used the popular Bell-Evans model to fit the dynamic force spectroscopy data. Bell-Evans fitting gives the ability to calculate off rate constant ( $k_{\text{off}}$ ), distance to the transition state ( $x\beta$ ) as well as TS barrier height ( $\Delta G$ ). The authors may want to report the  $\Delta G$  for both unbinding experiments (cAMP vs cGMP) and a comparison of the  $\Delta G$  values can be given for a better understanding to readers.

Response 4: We thank the reviewer for this suggestion. The dynamic force spectra for cAMP-CNBD and cGMP-CNBD unbinding were fitted using the Bell-Evans model (*eq. 1*):

$$F = \left( \frac{k_B T}{x_\beta} \right) \ln \frac{r x_\beta}{k_{\text{off}} k_B T} \quad (\text{eq. 1})$$

where  $F$  is the rupture force,  $r$  is the loading rate,  $k_B$  is the Boltzmann constant,  $T$  is the absolute temperature,  $k_{\text{off}}$  is the dissociation constant at zero force, and  $x_\beta$  is the distance to the unbinding barrier from the bound-state free energy minimum. We can calculate the  $\Delta G$  using an extended version of the Bell-Evans model, by fitting our data using the DHS model (O. K. Dudko, et al., Phys. Rev. Lett. 2006, 96, 108101)

$$F \cong \frac{\Delta G}{v x_\beta} \left[ 1 - \left( \frac{k_B T}{\Delta G} \ln \frac{k_{\text{off}} k_B T e^{\frac{\Delta G}{k_B T} + 0.577}}{x_\beta r} \right)^v \right]$$

$\Delta G$ ,  $k_{\text{off}}$ ,  $x_\beta$  can be derived from the fitting (cusp potential). We incorporated this part in the revised version of our manuscript lines 381 – 385, and new panel Figure 6b and Table S1.

| Method (DHS fit)                         | cN   | $k_{\text{off}}(1/\text{s})$ | $x_\beta$ (nm)  | $\Delta G$ (k <sub>B</sub> T) |
|------------------------------------------|------|------------------------------|-----------------|-------------------------------|
| 20ms bond formation time                 | cAMP | $1.2 \pm 0.4$                | $0.48 \pm 0.08$ | $10.4 \pm 1.7$                |
| 20ms bond formation time                 | cGMP | $1.6 \pm 0.3$                | $0.69 \pm 0.05$ | $9.2 \pm 1.3$                 |
| 1000ms bond formation time: State 1 bond | cAMP | $1.1 \pm 0.4$                | $0.57 \pm 0.07$ | $9.7 \pm 1.5$                 |
| 1000ms bond formation time: State 2 bond | cAMP | $0.5 \pm 0.2$                | $0.48 \pm 0.08$ | $10.9 \pm 2.0$                |

**Table S1)** cN-CNBD binding kinetics fitted by using DHS model.

**Comment 5:** Figure 3e should also include an inset showing the zoomed-in region of the unbinding force curve.

**Response 5:** We added an inset in Figure 3e.

**Decision Letter, first revision:**

**Message:** Our ref: NSMB-A46642A

19th Jan 2023



Dear Professor Scheuring,

Thank you again for submitting your manuscript "Discrimination between cyclic-nucleotides in a cyclic-nucleotide gated ion channel". The reports of the referees are below, and based on these comments, we are happy to accept your paper, in principle, for publication as an Article in Nature Structural & Molecular Biology, on the condition that you revise your manuscript in response to the comments of the referees and our editorial requirements.

You will see that reviewer #1 requests clarification of pulling velocity and loading rate.

The text and figures require revisions. Note that, within a few days, we will send you detailed instructions for the final revision, along with information on editorial and formatting requirements. We recommend that you do not start revising the manuscript until you receive this additional information.

To facilitate our work at this stage, we would appreciate if you could send us the main text as a word file. Please make sure to copy the NSMB account (cc'ed above).

We invite you to submit cover image proposals, which can be uploaded with the other files for the final revision (as file type "Cover Art"). At this stage, proposed images do not need to be at full-page size or high resolution; we may contact you to further refine the cover concept. We encourage you to explore ideas that showcase the findings of the paper using, for example, artistic interpretation or abstraction of a concept or experimental data.

Data availability: this journal strongly supports public availability of data. Please place the data used in your paper into a public data repository, or alternatively, present the data as Supplementary Information. If data can only be shared on request, please explain why in your Data Availability Statement, and also in the correspondence with your editor. Please note that for some data types, deposition in a public repository is mandatory - more information on our data deposition policies and available repositories can be found below: <https://www.nature.com/nature-research/editorial-policies/reporting-standards#availability-of-data>

#### TRANSPARENT PEER REVIEW

Nature Structural & Molecular Biology offers a transparent peer review option for new original research manuscripts submitted from 1st December 2019. We encourage increased transparency in peer review by publishing the reviewer comments, author rebuttal letters and editorial decision letters if the authors agree. Such peer review material is made available as a supplementary peer review file. **Please state in the cover letter 'I wish to participate in transparent peer review' if you want to opt in, or 'I do not wish to participate in transparent peer review' if you don't.** Failure to state your preference will result in delays in accepting your manuscript for publication. Please note: we allow redactions to authors' rebuttal and reviewer comments in the interest of confidentiality. If you are concerned about the release of confidential data, please let us know specifically what information you would like to have removed. Please note that we cannot incorporate redactions for any other reasons. Reviewer names will be



published in the peer review files if the reviewer signed the comments to authors, or if reviewers explicitly agree to release their name. For more information, please refer to our [FAQ page](https://www.nature.com/documents/nr-transparent-peer-review.pdf).

## ORCID

Nature Structural & Molecular Biology is committed to improving transparency in authorship. As part of our efforts in this direction, we are now requesting that all authors identified as 'corresponding author' create and link their Open Researcher and Contributor Identifier (ORCID) with their account on the Manuscript Tracking System (MTS) prior to acceptance. ORCID helps the scientific community achieve unambiguous attribution of all scholarly contributions. For more information please visit <http://www.springernature.com/orcid>

For all corresponding authors listed on the manuscript, please follow the instructions in the link below to link your ORCID to your account on our MTS before submitting the final version of the manuscript. If you do not yet have an ORCID you will be able to create one in minutes.  
<https://www.springernature.com/gp/researchers/orcid/orcid-for-nature-research>

**IMPORTANT:** All authors identified as 'corresponding author' on the manuscript must follow these instructions. Non-corresponding authors do not have to link their ORCIDs but are encouraged to do so. Please note that it will not be possible to add/modify ORCIDs at proof. Thus, if they wish to have their ORCID added to the paper they must also follow the above procedure prior to acceptance.

To support ORCID's aims, we only allow a single ORCID identifier to be attached to one account. If you have any issues attaching an ORCID identifier to your MTS account, please contact the [Platform Support Helpdesk](http://platformsupport.nature.com/).

We hope that you will support this initiative and supply the required information. Should you have any query or comments, please do not hesitate to contact me.

In recognition of the time and expertise our reviewers provide to Nature Structural & Molecular Biology's editorial process, we would like to formally acknowledge their contribution to the external peer review of your manuscript entitled "Discrimination between cyclic-nucleotides in a cyclic-nucleotide gated ion channel". For those reviewers who give their assent, we will be publishing their names alongside the published article.

"Nature Structural & Molecular Biology has now transitioned to a unified Rights Collection system which will allow our Author Services team to quickly and easily collect the rights and permissions required to publish your work. Once your paper is accepted, you will receive an email in approximately 10 business days providing you with a link to complete the grant of rights. If you choose to publish Open Access, our Author Services team will also be in touch at that time regarding any additional information that may be required to arrange payment for your article.

Please note that you will not receive your proofs until the publishing agreement has been

received through our system.

For information regarding our different publishing models please see our <https://www.springernature.com/gp/open-research/transformative-journals> Transformative Journals page. If you have any questions about costs, Open Access requirements, or our legal forms, please contact [ASJournals@springernature.com](mailto:ASJournals@springernature.com).

If you have any questions, please do not hesitate to contact me directly.

Sincerely,  
Katarzyna Ciazynska  
(she/her)  
Associate Editor  
Nature Structural & Molecular Biology  
<https://orcid.org/0000-0002-9899-2428>

Reviewer #1 (Remarks to the Author):

The authors have significantly improved their manuscript and convincingly supported the notion of the deep binding state. Not fully cleaned up, however, is the confusion between pulling velocity and loading rate. Pulling speed is  $\mu\text{m/s}$ , loading rate is  $\text{pN/s}$ . What is experimentally varied is pulling speed, not loading rate.

Reviewer #2 (Remarks to the Author):

I am satisfied with the revisions. I have no additional suggestions.

**Author Rebuttal, first revision:**

---

## Reviewers' Comments:

---

### REVIEWER #1

Remarks to the Author:

The authors have significantly improved their manuscript and convincingly supported the notion of the deep binding state. Not fully cleaned up, however, is the confusion between pulling velocity and loading rate. Pulling speed is  $\mu\text{m/s}$ , loading rate is  $\text{pN/s}$ . What is experimentally varied is pulling speed, not loading rate

We thank the reviewer for their initial comments and constructive suggestions that helped us improve our work.

The reviewer is right that the only parameter that is varied in experiments is the pulling speed. The loading rates is extracted from the slope of the adhesive peak before rupture. Of course, the reviewer and we know that increasing the pulling speed results through the stochasticity of the unbinding process, is a means to increase the loading rate. We regret that we missed to clean the text and clarify this entirely during the revision process and have now done so. (Lines: 114-117, 261, 271, 382, 385)

**Final Decision Letter:**

**Message** 24th Feb 2023

:

Dear Dr. Scheuring,

We are now happy to accept your revised paper "Discrimination between cyclic-nucleotides in a cyclic-nucleotide gated ion channel" for publication as a Article in Nature Structural & Molecular Biology.

Acceptance is conditional on the manuscript's not being published elsewhere and on there being no announcement of this work to the newspapers, magazines, radio or television until the publication date in Nature Structural & Molecular Biology.

Over the next few weeks, your paper will be copyedited to ensure that it conforms to Nature Structural & Molecular Biology style. Once your paper is typeset, you will receive an email with a link to choose the appropriate publishing options for your paper and our Author Services team will be in touch regarding any additional information that may be required.

After the grant of rights is completed, you will receive a link to your electronic proof via email with a request to make any corrections within 48 hours. If, when you receive your proof, you cannot meet this deadline, please inform us at [rjsproduction@springernature.com](mailto:rjsproduction@springernature.com) immediately.

You will not receive your proofs until the publishing agreement has been received through our system.

Due to the importance of these deadlines, we ask that you please let us know now whether you will be difficult to contact over the next month. If this is the case, we ask you provide us with the contact information (email, phone and fax) of someone who will be able to check the proofs on your behalf, and who will be available to address any last-minute problems.

To assist our authors in disseminating their research to the broader community, our SharedIt initiative provides all co-authors with the ability to generate a unique shareable link that will allow anyone (with or without a subscription) to read the published article. Recipients of the link with a subscription will also be able to download and print the PDF.

As soon as your article is published, you can generate your shareable link by entering the DOI of your article here: <a href="http://authors.springernature.com/share">http://authors.springernature.com/share<a>. Corresponding authors will also receive an automated email with the shareable link

Note the policy of the journal on data deposition:  
<http://www.nature.com/authors/policies/availability.html>.

Your paper will be published online soon after we receive proof corrections and will appear in print in the next available issue. You can find out your date of online publication by contacting the production team shortly after sending your proof corrections. Content is published online weekly on Mondays and Thursdays, and the embargo is set at 16:00 London time (GMT)/11:00 am US Eastern time (EST) on the day of publication. Now is the time to inform your Public Relations or Press Office about your paper, as they might be interested in promoting its publication. This will allow them time to prepare an accurate and satisfactory press release. Include your manuscript tracking number (NSMB-A46642B) and our journal name, which they will need when they contact our press office.

About one week before your paper is published online, we shall be distributing a press release to news organizations worldwide, which may very well include details of your work. We are happy for your institution or funding agency to prepare its own press release, but it must mention the embargo date and Nature Structural & Molecular Biology. If you or your Press Office have any enquiries in the meantime, please contact [press@nature.com](mailto:press@nature.com).

You can now use a single sign-on for all your accounts, view the status of all your manuscript submissions and reviews, access usage statistics for your published articles and download a record of your refereeing activity for the Nature journals.

If you have not already done so, we strongly recommend that you upload the step-by-step protocols used in this manuscript to the Protocol Exchange. Protocol Exchange is an open online resource that allows researchers to share their detailed experimental know-how. All uploaded protocols are made freely available, assigned DOIs for ease of citation and fully searchable through nature.com. Protocols can be linked to any publications in which they are used and will be linked to from your article. You can also establish a dedicated page to collect all your lab Protocols. By uploading your Protocols to Protocol Exchange, you are enabling researchers to more readily reproduce or adapt the methodology you use, as well as increasing the visibility of your protocols and papers. Upload your Protocols at [www.nature.com/protocolexchange/](http://www.nature.com/protocolexchange/). Further information can be found at [www.nature.com/protocolexchange/about](http://www.nature.com/protocolexchange/about).

An online order form for reprints of your paper is available at <a href="https://www.nature.com/reprints/author-reprints.html">https://www.nature.com/reprints/author-reprints.html</a>. Please let your coauthors and your institutions' public affairs office know that they are also welcome to order reprints by this method.

Please note that <i>Nature Structural & Molecular Biology</i> is a Transformative Journal (TJ). Authors may publish their research with us through the traditional subscription access route or make their paper immediately open access through payment of an article-processing charge (APC). Authors will not be required to make a final decision about

access to their article until it has been accepted. [Find out more about Transformative Journals](https://www.springernature.com/gp/open-research/transformative-journals)

**Authors may need to take specific actions to achieve [compliance](https://www.springernature.com/gp/open-research/funding/policy-compliance-faqs) with funder and institutional open access mandates.** If your research is supported by a funder that requires immediate open access (e.g. according to [Plan S principles](https://www.springernature.com/gp/open-research/plan-s-compliance)) then you should select the gold OA route, and we will direct you to the compliant route where possible. For authors selecting the subscription publication route, the journal's standard licensing terms will need to be accepted, including [self-archiving policies](https://www.springernature.com/gp/open-research/policies/journal-policies). Those licensing terms will supersede any other terms that the author or any third party may assert apply to any version of the manuscript.

In approximately 10 business days you will receive an email with a link to choose the appropriate publishing options for your paper and our Author Services team will be in touch regarding any additional information that may be required.

You will not receive your proofs until the publishing agreement has been received through our system.

If you have any questions about our publishing options, costs, Open Access requirements, or our legal forms, please contact [ASJournals@springernature.com](mailto:ASJournals@springernature.com)

Sincerely,

Katarzyna Ciazynska  
(she/her)  
Associate Editor  
Nature Structural & Molecular Biology  
<https://orcid.org/0000-0002-9899-2428>

Click here if you would like to recommend Nature Structural & Molecular Biology to your librarian:

<http://www.nature.com/subscriptions/recommend.html#forms>
