# Supplementary material for: Discrimination between cyclic nucleotides in a cyclic nucleotide-gated ion channel
Source: Springer Nature journal article supplement (doi:10.1038/s41594-023-00955-3), 2023-03-27
Supplement: MOESM4 [file 41594_2023_955_MOESM4_ESM.xlsx]

## Sheet: Figure 1e
	Trace 1	Width (µm)	height (nm)			Trace 2	Width (µm)	height (nm)
		0	-0.25934				0.0296	5.07409
		0.02947	-0.25934				0.05921	5.11111
		0.05895	-0.25934				0.08873	5.0963
		0.08834	-0.21619				0.11833	5.0815
		0.11781	-0.21619				0.14794	5.0963
		0.14728	-0.21619				0.17754	5.16292
		0.17676	-0.17303				0.20706	5.19253
		0.20615	-0.08673				0.23667	5.19993
		0.23562	-0.08673				0.26627	5.18513
		0.26509	-0.08673				0.29588	5.14812
		0.29457	-0.15146				0.32548	5.19993
		0.32404	-0.19461				0.355	5.31836
		0.35343	-0.23776				0.38461	5.36278
		0.3829	-0.28091				0.41421	5.35537
		0.41238	-0.30248				0.44381	5.36278
		0.44185	-0.28091				0.47334	5.39978
		0.47124	-0.25934				0.50294	5.38498
		0.50071	-0.21619				0.53254	5.29616
		0.53019	-0.17303				0.56215	5.26655
		0.55966	-0.08673				0.59175	5.25174
		0.58913	-0.02201				0.62127	5.24434
		0.61852	-0.02201				0.65088	5.22954
		0.648	-0.04358				0.68048	5.20733
		0.67747	-0.04358				0.71009	5.19253
		0.70694	-0.12989				0.73961	5.21474
		0.73633	-0.21619				0.76921	5.30356
		0.76581	-0.19461				0.79882	5.34797
		0.79528	-0.08673				0.82842	5.35537
		0.82475	-0.04358				0.85802	5.39238
		0.85423	-0.08673				0.88755	5.42939
		0.88362	-0.08673				0.91715	5.4738
		0.91309	-0.000433665				0.94675	5.4664
		0.94256	0.04272				0.97636	5.19993
		0.97204	0.08587				1.00588	4.67439
		1.00143	0.06429				1.03548	3.89718
		1.0309	-0.02201				1.06509	2.8683
		1.06037	-0.06516				1.09469	2.07628
		1.08985	-0.06516				1.1243	1.49893
		1.11932	-0.10831				1.15382	1.06221
		1.14871	-0.21619				1.18342	0.78834
		1.17818	0.1506				1.21303	0.60329
		1.20766	0.97046				1.24263	0.50706
		1.23713	2.02765				1.27215	0.43305
		1.26652	3.3006				1.30176	0.35162
		1.29599	4.09889				1.33136	0.29241
		1.32547	4.44409				1.36096	0.2702
		1.35494	4.68142				1.39057	0.23319
		1.38441	4.85402				1.42009	0.18878
		1.4138	4.98348				1.44969	0.18138
		1.44328	5.06978				1.4793	0.18138
		1.47275	5.15608				1.5089	0.18878
		1.50223	5.15608				1.53842	0.20358
		1.53162	5.15608				1.56803	0.18878
		1.56109	5.15608				1.59763	0.15917
		1.59056	5.15608				1.62724	0.14436
		1.62004	5.09135				1.65684	0.13696
		1.64951	5.09135				1.68636	0.12956
		1.6789	5.22081				1.71597	0.12216
		1.70837	5.26396				1.74557	0.08515
		1.73785	5.22081				1.77517	0.04814
		1.76732	5.26396				1.80469	0.03334
		1.79671	5.26396				1.8343	0.06294
		1.82618	5.22081				1.8639	0.07774
		1.85566	5.13451				1.89351	0.08515
		1.88513	5.0482				1.92311	0.09255
		1.9146	5.02663				1.95263	0.10736
		1.94399	5.00506				1.98224	0.10736
		1.97347	4.98348				2.01184	0.11476
		2.00294	5.06978				2.04145	0.11476
		2.03241	5.17765				2.07097	0.09255
		2.0618	5.26396				2.10057	0.06294
		2.09128	5.26396				2.13018	0.03334
		2.12075	5.22081				2.15978	0.02594
		2.15022	5.13451				2.18938	0.09996
		2.1797	5.09135				2.2189	0.14436
		2.20909	5.13451				2.24851	0.12216
		2.23856	5.09135				2.27811	0.18138
		2.26803	4.98348				2.30772	0.29241
		2.29751	4.98348				2.33732	0.32941
		2.32698	5.02663				2.36684	0.29241
		2.35637	5.02663				2.39645	0.24799
		2.38584	4.94033				2.42605	0.17397
		2.41532	4.94033				2.45566	0.10736
		2.44479	5.02663				2.48518	0.06294
		2.47418	5.06978				2.51478	0.04074
		2.50365	5.09135				2.54439	0.04074
		2.53313	5.11293				2.57399	0.06294
		2.5626	5.11293				2.60359	0.13696
		2.59207	5.11293				2.63312	0.18878
		2.62146	5.13451				2.66272	0.18878
		2.65094	5.13451				2.69232	0.18878
		2.68041	5.06978				2.72193	0.20358
		2.70988	5.06978				2.75145	0.21839
		2.73927	5.17765				2.78105	0.2628
		2.76875	5.00506				2.81066	0.2554
		2.79822	4.6167				2.84026	0.21098
		2.82769	3.92628				2.86987	0.20358
		2.85717	2.91224				2.89939	0.24799
		2.88656	2.11395				2.92899	0.24059
		2.91603	1.50985				2.9586	0.21098
		2.9455	0.99204				2.9882	0.20358
		2.97498	0.62525				3.01772	0.20358
		3.00437	0.38792				3.04733	0.19618
		3.03384	0.25847				3.07693	0.22579
		3.06331	0.19374				3.10653	0.24059
		3.09279	0.2369				3.13614	0.23319
		3.12226	0.2369				3.16566	0.21839
		3.15165	0.2369				3.19526	0.19618
		3.18112	0.2369				3.22487	0.18138
		3.2106	0.2369				3.25447	0.16657
		3.24007	0.19374				3.28399	0.15177
		3.26946	0.1506				3.3136	0.18138
		3.29893	0.12902				3.3432	0.23319
		3.32841	0.19374				3.37281	0.32201
		3.35788	0.19374				3.40241	0.37383
		3.38735	0.2369				3.43193	0.38863
		3.41674	0.2369				3.46154	0.35903
		3.44622	0.2369				3.49114	0.2628
		3.47569	0.2369				3.52074	0.22579
		3.50516	0.34478				3.55026	0.28501
		3.53455	0.34478				3.57987	0.2776
		3.56403	0.3232				3.60947	0.2554
		3.5935	0.28005				3.63908	0.24059
		3.62297	0.30162				3.66868	0.2554
		3.65245	0.2369				3.6982	0.30721
		3.68184	0.1506				3.72781	0.37383
		3.71131	0.10745				3.75741	0.39603
		3.74078	0.1506				3.78702	0.37383
		3.77026	0.12902				3.81654	0.38863
		3.79965	0.04272				3.84614	0.47745
		3.82912	-0.04358				3.87575	0.51447
		3.85859	-0.12989				3.90535	0.50706
		3.88807	-0.08673				3.93495	0.44785
		3.91754	-0.000433665				3.96447	0.35162
		3.94693	0.08587				3.99408	0.31461
		3.9764	0.10745				4.02368	0.32201
		4.00588	0.10745				4.05329	0.29981
		4.03535	0.1506				4.08281	0.24059
		4.06474	0.1506				4.11241	0.22579
		4.09421	0.1506				4.14202	0.2554
		4.12369	0.19374				4.17162	0.29241
		4.15316	0.2369				4.20123	0.33682
		4.18263	0.21532				4.23075	0.36643
		4.21202	0.1506				4.26035	0.38863
		4.2415	0.12902				4.28996	0.34422
		4.27097	0.12902				4.31956	0.24059
		4.30045	0.10745				4.34908	0.12216
		4.32983	0.10745				4.37868	0.02594
		4.35931	0.12902				4.40829	-0.01848
		4.38878	0.19374				4.43789	0.01853
		4.41826	0.19374				4.4675	0.07774
		4.44773	0.17217				4.49702	0.18878
		4.47712	0.1506				4.52662	0.22579
		4.50659	0.10745				4.55623	0.21839
		4.53607	0.10745				4.58583	0.18878
		4.56554	0.1506				4.61535	0.16657
		4.59493	0.17217				4.64496	0.14436
		4.6244	0.19374				4.67456	0.14436
		4.65388	0.21532				4.70417	0.15177
		4.68335	0.2369				4.73377	0.17397
		4.71282	0.2369				4.76329	0.22579
		4.74221	0.19374				4.79289	0.29981
		4.77169	0.17217				4.8225	0.33682
		4.80116	0.19374				4.8521	0.38123
		4.83063	0.19374				4.88162	0.41824
		4.86002	0.1506				4.91123	0.41083
		4.8895	0.1506				4.94083	0.41824
		4.91897	0.17217				4.97044	0.40343
		4.94844	0.17217				5.00004	0.37383
		4.97792	0.17217				5.02956	0.32201
		5.00731	0.21532				5.05917	0.24799
		5.03678	0.3232				5.08877	0.18878
		5.06625	0.38792				5.11838	0.12216
		5.09573	0.43108				5.1479	0.10736
		5.12512	0.43108				5.1775	0.09996
		5.15459	0.43108				5.20711	0.09996
		5.18406	0.34478				5.23671	0.10736
		5.21354	0.28005				5.26631	0.09996
		5.24301	0.2369				5.29583	0.13696
		5.2724	0.28005				5.32544	0.24059
		5.30187	0.2369				5.35504	0.2628
		5.33135	0.19374				5.38465	0.24059
		5.36082	0.19374				5.41417	0.22579
		5.39021	0.2369				5.44377	0.21098
		5.41968	0.2369				5.47338	0.20358
		5.44916	0.19374				5.50298	0.19618
		5.47863	0.19374				5.53259	0.16657
		5.5081	0.28005				5.56211	0.11476
		5.53749	0.25847				5.59171	0.09996
		5.56697	0.19374				5.62132	0.15917
		5.59644	0.17217				5.65092	0.18878
		5.62591	0.19374				5.68044	0.17397
		5.6553	0.19374				5.71004	0.18878
		5.68478	0.1506				5.73965	0.21098
		5.71425	0.12902				5.76925	0.22579
		5.74372	0.12902				5.79886	0.23319
		5.7732	0.19374				5.82838	0.24059
		5.80259	0.28005				5.85798	0.2628
		5.83206	0.30162				5.88759	0.2554
		5.86153	0.2369				5.91719	0.21839
		5.89101	0.21532				5.94671	0.16657
		5.9204	0.19374				5.97632	0.12216
		5.94987	0.1506				6.00592	0.12956
		5.97934	0.10745				6.03553	0.16657
		6.00882	0.08587				6.06513	0.18138
		6.03829	0.12902				6.09465	0.18878
		6.06768	0.10745				6.12425	0.19618
		6.09715	0.06429				6.15386	0.19618
		6.12663	0.02115				6.18346	0.14436
		6.1561	0.02115				6.21298	0.07774
		6.18549	0.06429				6.24259	0.06294
		6.21496	0.10745				6.27219	0.09996
		6.24444	0.1506				6.3018	0.15917
		6.27391	0.25847				6.3314	0.22579
		6.30338	0.28005				6.36092	0.2554
		6.33277	0.2369				6.39053	0.21839
		6.36225	0.19374				6.42013	0.20358
		6.39172	0.1506				6.44974	0.19618
		6.42119	0.1506				6.47926	0.16657
		6.45058	0.17217				6.50886	0.09996
		6.48006	0.1506				6.53846	0.09255
		6.50953	0.1506				6.56807	0.15177
		6.539	0.1506				6.59767	0.18878
		6.56848	0.19374				6.62719	0.21839
		6.59787	0.19374				6.6568	0.2702
		6.62734	0.2369				6.6864	0.36643
		6.65681	0.2369				6.71601	0.52927
		6.68629	0.1506				6.74553	0.75133
		6.71568	0.1506				6.77513	1.3657
		6.74515	0.1506				6.80474	2.36497
		6.77462	0.1506				6.83434	3.14217
		6.8041	0.1506				6.86395	3.71213
		6.83357	0.1506				6.89347	4.15625
		6.86296	0.19374				6.92307	4.48194
		6.89243	0.19374				6.95267	4.7188
		6.92191	0.17217				6.98228	4.87424
		6.95138	0.12902				7.01188	5.00007
		6.98085	0.06429				7.0414	5.06669
		7.01024	0.43108				7.07101	5.13331
		7.03972	1.20779				7.10061	5.14812
		7.06919	2.0708				7.13022	5.13331
		7.09866	2.97697				7.15974	5.0889
		7.12805	3.62423				7.18934	5.0963
		7.15753	4.05574				7.21895	5.10371
		7.187	4.42252				7.24855	5.13331
		7.21648	4.74615				7.27816	5.12591
		7.24595	4.89718				7.30768	5.13331
		7.27534	4.91875				7.33728	5.15552
		7.30481	4.98348				7.36688	5.15552
		7.33429	5.15608				7.39649	5.14812
		7.36376	5.24238				7.42601	5.17772
		7.39315	5.26396				7.45561	5.28876
		7.42262	5.26396				7.48522	5.32576
		7.4521	5.19923				7.51482	5.28136
		7.48157	5.15608				7.54443	5.26655
		7.51104	5.13451				7.57395	5.30356
		7.54043	5.09135				7.60355	5.29616
		7.56991	4.98348				7.63316	5.28136
		7.59938	4.98348				7.66276	5.25174
		7.62885	5.11293				7.69228	5.22214
		7.65824	5.17765				7.72189	5.21474
		7.68772	5.22081				7.75149	5.22214
		7.71719	5.19923				7.7811	5.19993
		7.74666	5.15608				7.8107	5.16292
		7.77614	5.17765				7.84022	5.16292
		7.80553	5.26396				7.86982	5.19993
		7.835	5.26396				7.89943	5.23694
		7.86447	5.19923				7.92903	5.27395
		7.89395	5.19923				7.95855	5.25174
		7.92334	5.30711				7.98816	5.18513
		7.95281	5.30711				8.01776	4.84463
		7.98228	5.19923				8.04737	4.23027
		8.01176	5.11293				8.07697	3.50487
		8.04123	5.09135				8.10649	2.66104
		8.07062	5.09135				8.1361	1.97266
		8.10009	5.09135				8.1657	1.42491
		8.12957	5.09135				8.19531	1.02521
		8.15904	5.15608				8.22483	0.76614
		8.18843	5.19923				8.25443	0.55148
		8.2179	5.19923				8.28403	0.38863
		8.24738	5.11293				8.31364	0.2628
		8.27685	4.9619				8.34324	0.21839
		8.30632	4.42252				8.37276	0.18138
		8.33571	3.45163				8.40237	0.22579
		8.36519	2.58861				8.43197	0.19618
		8.39466	1.8119				8.46158	0.11476
		8.42413	1.20779				8.4911	0.12956
		8.45352	0.79786				8.5207	0.21098
		8.483	0.51738				8.55031	0.21098
		8.51247	0.34478				8.57991	0.09996
		8.54194	0.17217				8.60952	0.04814
		8.57142	0.06429				8.63904	0.05554
		8.60081	-0.000433665				8.66864	0.06294
		8.63028	-0.000433665				8.69824	0.09255
		8.65975	-0.000433665				8.72785	0.07034
		8.68923	0.02115				8.75737	0.01113
		8.71862	-0.000433665				8.78697	0.03334
		8.74809	-0.08673				8.81658	0.08515
		8.77756	-0.12989				8.84618	0.12956
		8.80704	-0.06516				8.87579	0.14436
		8.83651	-0.02201				8.90531	0.10736
		8.8659	-0.000433665				8.93491	0.04074
		8.89537	0.04272				8.96452	0.02594
		8.92485	-0.000433665				8.99412	0.03334
		8.95432	-0.02201				9.02364	0.03334
		8.98371	0.02115				9.05325	0.01853
		9.01318	-0.000433665				9.08285	0.01853
		9.04266	-0.02201				9.11245	0.03334
		9.07213	-0.04358				9.14206	0.04814
		9.1016	-0.04358				9.17158	0.04074
		9.13099	-0.04358				9.20118	0.01853
		9.16047	-0.000433665				9.23079	-0.02588
		9.18994	0.08587				9.26039	-0.03328
		9.21941	0.12902				9.28991	0.01853
		9.2488	0.1506				9.31952	0.07034
		9.27828	0.1506				9.34912	0.09996
		9.30775	0.19374				9.37873	0.15917
		9.33722	0.2369				9.40833	0.18878
		9.3667	0.2369				9.43785	0.21098
		9.39609	0.12902				9.46746	0.17397
		9.42556	0.08587				9.49706	0.12956
		9.45503	0.04272				9.52666	0.04814
		9.48451	-0.000433665				9.55619	0.03334
		9.5139	-0.000433665				9.58579	0.03334
		9.54337	-0.000433665				9.61539	0.04814
		9.57284	-0.000433665				9.645	0.07034
		9.60232	-0.000433665				9.6746	0.04074
		9.63179	0.02115				9.70412	-0.03328
		9.66118	0.02115				9.73373	-0.05549
		9.69065	-0.000433665				9.76333	-0.07029
		9.72013	-0.000433665				9.79294	-0.07029
		9.7496	-0.04358				9.82246	-0.04808
		9.77899	-0.04358				9.85206	-0.01848
		9.80846	-0.04358				9.88167	-0.01108
		9.83794	-0.04358				9.91127	0.00373
		9.86741	-0.08673				9.94088	0.01113
		9.89688	-0.08673				9.9704	0.01853
		9.92627	-0.08673				10	0.04074
		9.95575	-0.04358				10.0296	0.07774
		9.98522	-0.000433665				10.0592	0.09996
		10.0147	0.04272				10.0887	0.14436
		10.0441	0.02115				10.1183	0.18878
		10.0736	0.02115				10.1479	0.18138
		10.103	0.02115				10.1775	0.10736
		10.1325	-0.000433665				10.2072	0.10736
		10.162	-0.08673				10.2367	0.15177
		10.1914	-0.12989				10.2663	0.17397
		10.2208	-0.04358				10.2959	0.16657
		10.2503	-0.02201				10.3255	0.14436
		10.2798	-0.02201				10.355	0.09996
		10.3092	0.02115				10.3846	0.07774
		10.3386	0.04272				10.4142	0.08515
		10.3681	0.04272				10.4438	0.07034
		10.3976	0.04272				10.4734	0.03334
		10.4271	-0.000433665				10.5029	0.77354
		10.4565	-0.08673				10.5325	2.26874
		10.4859	-0.10831				10.5622	3.41605
		10.5154	-0.08673				10.5917	4.17845
		10.5449	-0.08673				10.6213	4.66698
		10.5743	-0.04358				10.6509	4.83723
		10.6037	-0.04358				10.6805	4.91865
		10.6332	-0.04358				10.7101	4.92606
		10.6627	-0.02201				10.7397	4.93346
		10.6922	-0.02201				10.7692	4.92606
		10.7216	0.56053				10.7988	4.94827
		10.751	1.68244				10.8284	5.02969
		10.7805	2.71806				10.858	5.04449
		10.81	3.75368				10.8875	4.99267
		10.8394	4.40094				10.9171	5.02229
		10.8688	4.703				10.9467	5.0815
		10.8983	4.8756				10.9764	5.12591
		10.9278	4.83245				11.006	5.16292
		10.9573	4.83245				11.0355	5.16292
		10.9866	4.83245				11.0651	5.11851
		11.0161	4.83245				11.0947	5.07409
		11.0456	4.83245				11.1243	5.04449
		11.0751	4.8756				11.1538	5.01488
		11.1045	4.98348				11.1834	4.97047
		11.1339	5.02663				11.213	5.00007
		11.1634	5.0482				11.2426	5.0815
		11.1929	5.02663				11.2722	5.05929
		11.2224	4.98348				11.3018	4.92606
		11.2517	4.98348				11.3314	4.77062
		11.2812	5.02663				11.361	4.59297
		11.3107	4.98348				11.3906	4.3413
		11.3402	4.8756				11.4201	4.03042
		11.3696	4.83245				11.4497	3.51228
		11.399	4.83245				11.4793	2.78688
		11.4285	4.8756				11.5089	2.09849
		11.458	5.02663				11.5385	1.43972
		11.4875	5.06978				11.568	0.92898
		11.5168	5.0482				11.5976	0.55888
		11.5463	5.02663				11.6272	0.29981
		11.5758	5.06978				11.6568	0.15917
		11.6053	5.06978				11.6864	0.06294
		11.6347	5.02663				11.716	0.03334
		11.6641	4.98348				11.7456	-0.00368
		11.6936	4.98348				11.7752	-0.04808
		11.7231	4.98348				11.8048	-0.07769
		11.7525	4.98348				11.8343	-0.0999
		11.7819	5.02663				11.8639	-0.13691
		11.8114	5.06978				11.8935	-0.17392
		11.8409	5.09135				11.9231	-0.17392
		11.8704	5.09135				11.9527	-0.15912
		11.8998	5.11293				11.9822	-0.15171
		11.9292	5.11293				12.0118	-0.15912
		11.9587	5.11293				12.0414	-0.15171
		11.9882	5.06978				12.071	-0.14431
		12.0176	5.02663				12.1006	-0.12951
		12.047	4.94033				12.1302	-0.14431
		12.0765	4.42252				12.1598	-0.13691
		12.106	3.45163				12.1894	-0.12211
		12.1354	2.58861				12.219	-0.1073
		12.1649	1.85505				12.2485	-0.12211
		12.1943	1.29409				12.2781	-0.1073
		12.2238	0.99204				12.3077	-0.06289
		12.2532	0.75471				12.3373	-0.05549
		12.2827	0.60368				12.3668	-0.07769
		12.3121	0.45265				12.3964	-0.07029
		12.3416	0.28005				12.4261	-0.02588
		12.3711	0.19374				12.4557	-0.01848
		12.4005	0.1506				12.4853	-0.04808
		12.43	0.1506				12.5148	-0.06289
		12.4594	0.10745				12.5444	-0.02588
		12.4889	0.10745				12.574	-0.03328
		12.5183	0.08587				12.6036	-0.05549
		12.5478	0.06429				12.6331	-0.03328
		12.5772	0.06429				12.6627	0.03334
		12.6067	0.04272				12.6923	0.01853
		12.6362	0.04272				12.7219	-0.05549
		12.6656	0.1506				12.7515	-0.06289
		12.6951	0.43108				12.7811	-0.02588
		12.7245	0.47423				12.8107	0.04814
		12.754	0.3232				12.8403	0.18138
		12.7834	0.28005				12.8699	0.24059
		12.8129	0.3232				12.8994	0.2628
		12.8423	0.3232				12.929	0.2554
		12.8718	0.2369				12.9586	0.18878
		12.9012	0.19374				12.9882	0.74392
		12.9307	0.19374				13.0178	1.94305
		12.9602	0.1506				13.0473	2.99413
		12.9896	0.12902				13.0769	3.91198
		13.0191	0.1506				13.1065	4.43753
		13.0485	0.19374				13.1361	4.57816
		13.078	0.19374				13.1657	4.7336
		13.1074	0.1506				13.1953	4.90385
		13.1369	0.04272				13.2249	5.00748
		13.1663	-0.10831				13.2545	5.07409
		13.1958	-0.19461				13.2841	5.0815
		13.2253	-0.12989				13.3136	5.0963
		13.2547	-0.17303				13.3432	5.0889
		13.2842	-0.23776				13.3728	5.12591
		13.3136	-0.23776				13.4024	5.0963
		13.3431	-0.12989				13.4319	5.03709
		13.3725	-0.000433665				13.4615	5.05189
		13.402	0.04272				13.4911	5.06669
		13.4314	0.04272				13.5207	5.0889
		13.4609	0.04272				13.5503	5.11851
		13.4904	0.06429				13.5799	5.13331
		13.5198	0.10745				13.6095	5.15552
		13.5493	0.10745				13.6391	5.13331
		13.5787	0.06429				13.6687	5.0815
		13.6082	0.04272				13.6982	5.01488
		13.6376	0.04272				13.7278	4.94827
		13.6671	0.06429				13.7574	4.90385
		13.6965	0.10745				13.787	4.91865
		13.726	0.10745				13.8166	4.91125
		13.7555	0.06429				13.8461	4.87424
		13.7849	0.04272				13.8758	4.85944
		13.8143	-0.000433665				13.9054	4.85944
		13.8438	-0.000433665				13.935	4.85944
		13.8733	-0.000433665				13.9645	4.84463
		13.9027	-0.04358				13.9941	4.86684
		13.9322	-0.12989				14.0237	4.88905
		13.9616	-0.10831				14.0533	4.94086
		13.9911	-0.02201				14.0829	4.99267
		14.0206	0.02115				14.1124	5.03709
		14.05	-0.04358				14.142	5.04449
		14.0794	-0.04358				14.1716	4.80762
		14.1089	0.04272				14.2012	4.33389
		14.1384	0.06429				14.2308	3.58629
		14.1678	-0.000433665				14.2604	2.57962
		14.1973	-0.000433665				14.29	1.81722
		14.2267	-0.000433665				14.3196	1.28428
		14.2562	-0.000433665				14.3492	0.88457
		14.2857	0.04272				14.3787	0.56628
		14.3151	-0.000433665				14.4083	0.33682
		14.3445	-0.08673				14.4379	0.16657
		14.374	-0.15146				14.4675	0.06294
		14.4035	-0.19461				14.497	0.01853
		14.4329	-0.19461				14.5266	0.03334
		14.4623	-0.15146				14.5562	0.05554
		14.4918	-0.12989				14.5858	0.05554
		14.5213	-0.12989				14.6154	0.01853
		14.5508	-0.08673				14.645	-0.02588
		14.5801	-0.04358				14.6746	-0.06289
		14.6096	-0.02201				14.7042	-0.07029
		14.6391	-0.04358				14.7338	-0.07029
		14.6686	-0.04358				14.7633	-0.01848
		14.698	-0.08673				14.7929	0.07774
		14.7274	-0.12989				14.8225	0.12216
		14.7569	-0.19461				14.8521	0.06294
		14.7864	-0.15146				14.8817	0.05554
		14.8158	-0.000433665				14.9112	0.04074
		14.8452	0.06429				14.9408	-0.00368
		14.8747	0.04272				14.9704	-0.0851
		14.9042	0.02115				15	0.16657
		14.9337	-0.04358
		14.9631	-0.12989
		14.9925	-0.21619

## Sheet: Figure 1f
			Bin centers (nm)	Counts
			-2.02703	0
			-1.95946	1
			-1.89189	9
			-1.82432	9
			-1.75676	2
			-1.68919	4
			-1.62162	4
			-1.55405	11
			-1.48649	22
			-1.41892	18
			-1.35135	16
			-1.28378	33
			-1.21622	71
			-1.14865	105
			-1.08108	174
			-1.01351	247
			-0.94595	350
			-0.87838	532
			-0.81081	836
			-0.74324	1300
			-0.67568	2073
			-0.60811	2979
			-0.54054	4184
			-0.47297	5384
			-0.40541	6810
			-0.33784	8159
			-0.27027	10286
			-0.2027	12554
			-0.13514	14174
			-0.06757	15678
			1.11022e-16	16350
			0.06757	15786
			0.13514	14648
			0.2027	13898
			0.27027	12642
			0.33784	11002
			0.40541	9283
			0.47297	7362
			0.54054	5605
			0.60811	4081
			0.67568	3047
			0.74324	2134
			0.81081	1452
			0.87838	1166
			0.94595	829
			1.01351	677
			1.08108	522
			1.14865	413
			1.21622	348
			1.28378	346
			1.35135	301
			1.41892	305
			1.48649	261
			1.55405	276
			1.62162	232
			1.68919	212
			1.75676	224
			1.82432	227
			1.89189	211
			1.95946	227
			2.02703	222
			2.09459	209
			2.16216	210
			2.22973	189
			2.2973	202
			2.36486	204
			2.43243	199
			2.5	195
			2.56757	194
			2.63514	204
			2.7027	194
			2.77027	192
			2.83784	197
			2.90541	214
			2.97297	219
			3.04054	191
			3.10811	194
			3.17568	208
			3.24324	230
			3.31081	244
			3.37838	261
			3.44595	261
			3.51351	278
			3.58108	279
			3.64865	316
			3.71622	312
			3.78378	319
			3.85135	406
			3.91892	427
			3.98649	503
			4.05405	507
			4.12162	594
			4.18919	659
			4.25676	756
			4.32432	965
			4.39189	1207
			4.45946	1402
			4.52703	1667
			4.59459	1909
			4.66216	2195
			4.72973	2470
			4.7973	2846
			4.86486	3061
			4.93243	3148
			5	3201
			5.06757	3120
			5.13514	2907
			5.2027	2850
			5.27027	2236
			5.33784	1712
			5.40541	1225
			5.47297	799
			5.54054	586
			5.60811	431
			5.67568	349
			5.74324	290
			5.81081	156
			5.87838	116
			5.94595	47
			6.01351	36
			6.08108	25
			6.14865	9
			6.21622	12
			6.28378	6
			6.35135	3
			6.41892	5
			6.48649	4
			6.55405	5
			6.62162	7
			6.68919	6
			6.75676	2
			6.82432	1
			6.89189	4
			6.95946	4
			7.02703	6
