# Supplementary material for: Discrimination between cyclic nucleotides in a cyclic nucleotide-gated ion channel
Source: Springer Nature journal article supplement (doi:10.1038/s41594-023-00955-3), 2023-03-27
Supplement: MOESM5 [file 41594_2023_955_MOESM5_ESM.xlsx]

## Sheet: Figure 2c
	cAMP		cAMP experiments normalized rupture frequency	control experiments
		exp.1	1	0.2
		exp.2	1	0.1
		exp.3	1	0.17
		Mean	1	0.16
		S.D.	0	0.05
	cGMP		cGMP experiments normalized rupture frequency	control experiments
		exp.1	1	0.08
		exp.2	1	0.3
		exp.3	1	0.15
		Mean	1	0.18
		S.D.	0	0.11
