# Supplementary material for: Discrimination between cyclic nucleotides in a cyclic nucleotide-gated ion channel
Source: Springer Nature journal article supplement (doi:10.1038/s41594-023-00955-3), 2023-03-27
Supplement: MOESM6 [file 41594_2023_955_MOESM6_ESM.xlsx]

## Sheet: Figure 3b
	0.2 µm/s						0.4 µm/s						2 µm/s
		Bin centers (pN)	Frequency	Cumulative Sum				Bin centers	Frequency	Cumulative Sum				Bin centers	Frequency	Cumulative Sum
		17.8133	0.03279	4				28.8514	0.07042	5				39.0032	0.00752	1
		22.9028	0.05738	11				34.8492	0.1831	18				45.1616	0.06767	10
		27.9922	0.2377	40				40.8469	0.33803	42				51.32	0.15038	30
		33.0817	0.2377	69				46.8447	0.30986	64				57.4784	0.18797	55
		38.1713	0.22131	96				52.8425	0.07042	69				63.6368	0.27068	91
		43.2608	0.13934	113				58.8403	0.01408	70				69.7952	0.15789	112
		48.3503	0.05738	120				64.8381	0.01408	71				75.9536	0.09774	125
		53.4397	0.0082	121										82.112	0.03759	130
		58.5292	0.0082	122										88.2704	0.00752	131
														94.4288	0	131
														100.587	0.01504	133

## Sheet: Figure 3d
	5000 µm/s					50000 µm/s					500000 µm/s
	Total data points N=28	Bin centers (pN)	Frequency			Total data points N=30	Bin centers (pN)	Frequency			Total data points N=30	Bin centers (pN)	Frequency
		144.445	0.001697				187.942	0.002002				218.418	0.004976
		186.536	0.003394				221.249	0.001001				251.91	0.003981
		228.626	0.004243				254.556	0.007006				285.403	0.008957
		270.717	0.007637				287.862	0.007006				318.895	0.005972
		312.808	0.003394				321.169	0.006005				352.387	0.001991
		354.898	0.001697				354.476	0.002002				385.879	0.001991
		396.989	0.001697				387.783	0.001001				419.371	0
							421.09	0.004003				452.863	0.001991

## Sheet: Figure 3f
	0.2 µm/s						0.4 µm/s						2.0 µm/s
		Bin centers	Frequency	Cumulative Sum				Bin centers	Frequency	Cumulative Sum				Bin centers	Frequency	Cumulative Sum
		12.5	0.00365	1				22.8622	0.01948	3				33.8421	0.00787	1
		17.5	0.08029	23				27.9428	0.12338	22				39.2402	0.03937	6
		22.5	0.18978	75				33.0232	0.23377	58				44.6383	0.07087	15
		27.5	0.31022	160				38.1037	0.23377	94				50.0364	0.17323	37
		32.5	0.27372	235				43.1842	0.19481	124				55.4345	0.22047	65
		37.5	0.08029	257				48.2647	0.12338	143				60.8327	0.16535	86
		42.5	0.04015	268				53.3453	0.03247	148				66.2308	0.13386	103
		47.5	0.0073	270				58.4258	0.03896	154				71.6289	0.06299	111
		52.5	0.01095	273										77.027	0.07874	121
		57.5	0.00365	274										82.4251	0.0315	125
														87.8233	0.00787	126
														93.2214	0.00787	127
														98.6195	0	127

## Sheet: Figure 3h
	5000 µm/s					50000 µm/s					500000 µm/s		50000 µm/s
	Total data points N=30	Bin centers (pN)	Frequency			Total data points N=30	Bin centers (pN)	Frequency			Total data points N=28	Bin centers (pN)	Frequency
		114.206	0.006537				178.564	0.006522				162.133	0.002947
		151.131	0.005603				214.343	0.006522				198.487	0.005894
		188.056	0.003735				250.122	0.009316				234.841	0.008842
		224.981	0.005603				285.901	0.002795				271.195	0.00393
		261.907	0.001868				321.68	0.001863				307.549	0.002947
		298.832	0.001868				357.459	0				343.903	0.000982
		335.757	0.000934				393.238	0				380.257	0.001965
		372.682	0.000934				429.016	0.000932

## Sheet: Figure 3i
	cAMP_experiments	loading rate (pN/s)	S.D.	Force (pN)	S.D.					cGMP_experiments	loading rate (pN/s)	S.D.	Force (pN	S.D.
		580.733	288	34.1	9						1258.68	833.5	28.56	5
		1636.8	863	42.3667	7						1872.72	962.5	37.74	7.5
		2102.83	678	49.6	5						5638.56	2742.5	43.86	10
		3701.4	1640	62	11						32267.7	16724	57.12	10
		14324.6	8537.5	74.9167	10						37616.6	16039.5	73.44	12
		32404.3	17935	88.8667	22						70204.6	40477.5	79.56	15
	cAMP_simulations	Loading rate (pN/s)	Force (pN)	S.D.						cGMP_simulations	loading rate (pN/s)	Force (pN)	S.D.
		241744000000	376.004	14.9772							218107000000	295.473	15.5578
		119274000000	326.85	10.014							97410438381	266.896	11.8205
		50386283799	307.023	12.7554							36233856396	228.036	9.67693
		27367540137	295.798	11.8635							23581298573	248.229	11.6448
		13265711278	297.014	10.9121							10061842400	212.186	11.0219
		5815957693	313.03	16.1279							4988399602	244.323	11.0433
		2900058300	304.758	12.0013							2503863208	237.001	10.9678
		1431639841	291.182	14.6769							1156393493	214.018	10.9378
		5.4774e+08	253.944	11.0868							4.76317e+08	223.814	10.7141
		2.76871e+08	262.673	12.8971							1.84669e+08	193.184	13.7798

## Sheet: Figure 3j
	cAMP						cGMP
		time	binding probability	S.D.				time	binding probability	S.D.
		0.02	0.12	0.04				0.02	0.054	0.015
		0.05	0.25	0.08				0.05	0.17	0.06
		0.2	0.47	0.11				0.2	0.28	0.1
		0.6	0.56	0.14				0.6	0.35	0.15
		0.8	0.66	0.16				0.8	0.42	0.15
		1	0.73	0.17				1	0.44	0.18
