# Supplementary material for: Discrimination between cyclic nucleotides in a cyclic nucleotide-gated ion channel
Source: Springer Nature journal article supplement (doi:10.1038/s41594-023-00955-3), 2023-03-27
Supplement: MOESM7 [file 41594_2023_955_MOESM7_ESM.xlsx]

## Sheet: b
		cAMP													cGMP
			COM distance (nm)	Average energy of res A370 (kcal/mol)	A379	R377	E368	G367	K419	M369	T378	Y367				COM distance (nm)	Average energy of res A379 (kcal/mol)	R417	R418	R377	E421	E423	E368	G367	K419	F365	T378
			0	0	0	0	0	0	0	0	0	0				0	0	0	0	0	0	0	0	0	0	0	0
			0.081	0	0	0	0	0	0	0	0	0				0.081	0	0	0	0	0	0	0	0	0	0	0
			0.162	-2.02922	-0.264503	-2.79768	-0.674998	-3.59669	-0.010384	-1.32698	-4.47308	-1.62014				0.162	0	0	0	0	0	0	0	0	0	0	0
			0.242	-2.1634	-0.210125	-2.88298	-0.548025	-3.38263	-0.019638	-1.54337	-4.7267	-0.484073				0.242	-1.11675	-0.009484	-0.012582	-2.4166	-0.005858	0.000499	-0.428006	-3.00502	-0.022282	-1.58408	-6.00986
			0.323	-1.9242	-0.193044	-2.85445	-0.481146	-2.89966	-0.033155	-1.47664	-4.86813	-0.071091				0.323	-1.12277	-0.013801	-0.0164	-2.50795	-0.006123	-0.003764	-0.272998	-2.4646	-0.037104	-0.431571	-5.97869
			0.404	-1.50774	-0.220142	-2.68609	-0.651553	-2.51516	-0.057938	-1.25346	-4.87431	-0.031242				0.404	-1.04678	-0.0053	-0.030282	-2.52351	-0.066954	-0.022337	-0.485476	-1.28629	-0.081254	-0.016952	-5.97386
			0.485	-1.28148	-0.159318	-2.53612	-1.24544	-1.82961	-0.027744	-1.17578	-4.25691	-0.030739				0.485	-0.852923	-0.000113	-0.049809	-2.07949	-0.069015	-0.046971	-0.747763	-0.895512	-0.111738	-0.035002	-5.28142
			0.566	-0.684413	-0.121424	-1.60287	-0.526036	-0.465616	-0.090737	-0.84318	-2.77644	-0.019182				0.566	-0.692173	-0.000669	-0.064492	-1.8011	-0.152936	-0.113691	-0.595769	-0.838902	-0.127399	-0.001108	-4.46934
			0.646	-0.292519	-0.182585	-1.1729	-0.319627	-0.05761	-0.102132	-0.39118	-2.1827	-2.2e-05				0.646	-0.662928	-0.049067	-0.086969	-0.963902	-0.097634	-0.017497	-0.147023	-0.443304	-0.146311	-0.012208	-2.36841
			0.727	-0.282206	-0.295746	-1.1109	-0.415984	-0.007182	-0.019733	-0.483093	-1.91892	0				0.727	-0.398059	-0.093826	-0.235704	-0.492416	-0.135779	-0.290496	-0.157814	-0.314791	-0.22674	-0.143914	-2.03919
			0.808	-0.143056	-0.168197	-0.533258	-0.054322	-0.001161	-0.013522	-0.287308	-1.18081	0				0.808	-0.769711	-0.099231	-0.072589	-0.785782	-0.116828	0.115118	-0.220109	-0.200238	-0.287187	-0.123686	-2.11489
			0.889	-0.200375	-0.018211	-0.131458	-0.34135	-0.00115	-0.108767	-0.233633	-0.740247	-6.7e-05				0.889	-0.538734	-0.095586	-0.086887	-0.817569	-0.095055	-0.027494	-0.078266	-0.180215	-0.236778	-0.12811	-2.10522
			0.97	-0.085417	-0.031733	-0.0747	-0.018675	-0.00015	-0.113533	-0.222717	-0.5369	0				0.97	-0.330976	-0.112223	-0.087231	-0.491056	0.091273	-0.138348	-0.1122	-0.174838	-0.258237	-0.087357	-1.54344
			1.051	-0.092586	-6.7e-05	-0.024725	-0.090683	-0.000183	0	-0.216544	-0.403889	0				1.051	-0.153832	-0.152641	-0.107188	-0.422043	-0.012321	-0.148538	-0.101046	-0.074659	-0.23312	-0.091288	-0.679267
			1.131	-0.1109	-3.3e-05	-0.00685	0.012167	-3.3e-05	-0.097667	-0.1943	-0.325383	0				1.131	-0.153254	-0.132202	-0.061844	-0.223418	-0.236536	-0.162106	0.023373	-0.000607	-0.292311	-0.02712	-0.832135
			1.212	-0.002	0	-0.010267	-0.007433	0	-6.7e-05	-0.130633	-0.143633	0				1.212	-0.016244	-0.107402	-0.294521	-0.01867	-0.09271	-0.122871	0.033598	-8.2e-05	-0.162017	-0.000129	-0.616171
			1.293	0	0	0	0	0	0	0	-0.1225	0				1.293	-0.032771	-0.119993	-0.146548	0	-0.034167	-0.068725	0.073419	0	-0.232393	-3.3e-05	-0.183346
			1.374	0	0	0	0	0	0	0	0	0				1.374	-0.003052	-0.24858	-0.226301	0	-0.153108	-0.110575	0.040857	0	-0.155467	-0.003095	-0.226423
			1.455	0	0	0	0	0	-0.1087	0	-0.110733	0				1.455	0	-0.220747	-0.23676	0	0.028067	-0.136483	0.007054	0	-0.281994	-0.000222	-0.007183
			1.535	0	0	0	0	0	0	0	0	0				1.535	0	-0.242755	-0.232464	0	-0.038439	-0.100201	-1.6e-05	0	-0.259403	-0.000181	-0.001362
			1.616	0	0	0	0	0	0	0	0	0				1.616	0	-0.244171	-0.256147	0	-0.015094	-3e-06	-8e-06	0	-0.252857	0	-1e-06
			1.697	0	0	0	0	0	-0.004867	0	0	0				1.697	0	-0.240581	-0.208066	0	-0.07295	-0.166767	0	0	-0.246475	0	-2e-06
			1.778	0	0	0	0	0	0	0	0	0				1.778	0	-0.241075	-0.29291	0	-0.055904	-0.07125	0	0	-0.278807	0	0
			1.859	0	0	0	0	0	0	0	0	0				1.859	0	-0.256764	-0.142554	0	-0.094156	-0.017367	0	0	-0.212905	0	0
			1.939	0	0	0	0	0	0	0	0	0				1.939	0	-0.212764	-0.0457	0	-0.023132	0.022056	0	0	-0.170531	0	0
			2.02	0	0	0	0	0	-0.000433	0	0	0				2.02	0	-0.185522	-0.181878	0	-0.162937	0.123367	0	0	-0.252361	0	0
