# Supplementary material for: Discrimination between cyclic nucleotides in a cyclic nucleotide-gated ion channel
Source: Springer Nature journal article supplement (doi:10.1038/s41594-023-00955-3), 2023-03-27
Supplement: MOESM8 [file 41594_2023_955_MOESM8_ESM.xlsx]

## Sheet: Figure 5a
		cAMP-0.02s	cAMP-1s	cGMP-0.02s	cAMP-1s
		9	13	7	7.5
		7	14.5	9	7.5
		5	16	9.5	9.4
		11	17.5	10.5	12.5
		10	21.5	12	12

## Sheet: Figure 5b 
	Grey crosses
		loading rate (pN/s)	force( pN)
		1901.99	25.4064			Dashed line
		2001.01	46.7865				loading rate(pN/s)	force (pN)	S.D.
		1783.27	54.3803				900	36	11
		955.659	30.9418				2700	41	10
		8083.3	75.9794				3100	45	11
		13552.6	30.236				25800	74	12
		4552.52	59.7175				5800	62	10
		1962.89	31.3173
		2653.67	58.3858
		1850.58	81.6365
		2545.04	64.1333			Grey line
		1833.63	41.7901				loading rate(pN/s)	force (pN)	S.D.
		1173.43	23.8105				900	51	11
		11206.1	63.1527				2700	56	10
		10214.7	63.9455				3100	63	13
		15709.9	58.0416				25800	95	15
		2428.3	30.535				5800	76	12
		4401.3	55.6216
		2773.07	60.8892
		3330.26	46.2093
		5337.4	49.7281
		4442.62	72.9335
		5267.08	33.2992
		3901.17	40.3888
		3000.22	50.2844
		5387.92	35.674
		4920.19	43.1878
		2101.64	30.1525
		13971.7	65.4197
		1825.54	37.9932
		1168.42	55.1522
		2238.94	42.3672
		1261.96	46.9082
		1384.99	57.0854
		3894.59	44.8081
		795.483	31.3243
		3503.38	54.0986
		4570.22	84.6371
		5908.4	44.8394
		2952.54	48.7893
		2259.62	55.6946
		2478.32	44.8185
		647.458	53.3789
		2218.37	48.0278
		1446.18	49.5994
		1765.68	46.5988
		2616.8	37.5168
		3807.26	40.5175
		8158.66	50.5695
		2833.31	56.8907
		2925.99	46.338
		6235.62	52.3497
		3253.83	60.4233
		10441.9	52.0194
		3100.29	44.5856
		4880.62	76.7409
		4838.08	58.3962
		4361.28	56.9741
		3247.11	32.4926
		2867.51	39.8847
		3292.89	43.0661
		899.501	49.4325
		1017.78	47.9652
		1119.95	66.369
		2160.11	44.4847
		1124.1	41.9639
		1101.56	51.4353
		2694.19	53.3928
		2630.06	63.5596
		8301.31	91.2747
		3931.15	43.4834
		5065.23	67.1998
		6074.23	66.0858
		841.092	34.503
		317.881	30.499
		3431.62	53.0395
		474.548	37.2611
		1438.11	37.2828
		5699.84	43.7659
		2641.82	30.8516
		2405.42	47.6358
		-14.7702	43.0174
		227.513	56.8922
		2841.22	53.0849
		2771.25	50.6621
		3384.75	76.5708
		408.298	46.8181
		7598.52	61.5409
		2186.39	70.6826
		8436.13	51.0645
		2228.84	49.6952
		1948.37	39.3984
		1722.37	53.1823
		2745.25	34.1375
		7889.97	27.2606
		4355.5	48.1182
		3362.21	50.6427
		3099.96	50.2187
		1556.99	41.2198
		10068	59.8384
		261.664	67.7709
		1074.42	36.6273
		6417.25	42.9136
		917.976	43.8589
		4322.55	39.937
		1743.01	52.2521
		726.883	48.129
		6080.51	54.4824
		908.457	41.5551
		-67.171	36.9583
		3634.53	85.1241
		969.14	44.7004
		3803	71.9351
		2500.69	74.3881
		2786.58	50.8049
		-217.219	45.6868
		1852.08	49.3426
		493.84	52.9984
		3054.92	70.2348
		3303.3	82.1994
		4406.1	89.0113
		3518.75	28.7186
		9576.4	46.9025
		3723.55	51.588
		5211.77	50.885
		904.538	55.4991
		3101.2	31.706
		7051.58	48.1961
		1916.1	55.4039
		6873.47	38.3925
		1010.08	48.2112
		1205.53	33.9384
		499.177	45.9053
		1462.31	54.1773
		2022.89	62.2937
		1731.6	29.77
		1389.56	54.5321
		14269.1	35.0568
		369.13	47.0626
		2538.2	52.6523
		1724.46	53.1109
		7144.29	24.972
		2190.89	43.6837
		2306.33	41.1181
		389.447	63.8988
		3209.11	26.96
		11083	33.9428
		9915.68	61.6707
		2476.81	36.2942
		3784.5	48.0447
		5771.68	67.5827
		1924.36	48.9792
		1655.23	52.6307
		3778.41	49.2734
		1065.79	62.8583
		2850.65	39.3702
		2225.06	52.5852
		7108.21	49.0203
		7573.14	46.8982
		5065.2	37.9166
		1100.76	50.3117
		1368.22	48.804
		5358.25	42.7362
		1569.33	31.2128
		4072.44	51.296
		6469.41	52.1439
		7243.11	33.2505
		31988.9	50.1019
		6593.62	43.9952
		4553.26	49.5719
		1413.67	37.8473
		2651.71	43.5128
		2202.95	28.1021
		1684.66	51.8757
		4679.17	63.3818
		1349.17	55.0816
		2018.27	57.0046
		9642.16	85.2214
		9271.3	48.765
		4348.31	44.9015
		4863.88	40.5427
		7260.47	41.4837
		2057.1	32.5237
		1069.92	43.5301
		11684.2	39.4524
		3040.88	55.4363
		7279.79	57.0566
		1455.29	25.9627
		2228.04	42.8227
		4628.23	34.0423
		4562.25	52.4403
		1378.72	48.2696
		5831.07	60.2321
		279.668	41.9012
		5310.28	35.7858
		2594.07	49.5524
		3040.8	71.9415
		6518.76	53.2969
		14688.5	99.0919
		4143.95	38.916
		3813.8	38.1156
		10274.9	41.0532
		5410.55	31.5697
		7388.97	61.2921
		6828.68	36.4002
		9103.44	39.2707
		1658.98	41.8276
		1766.94	52.9508
		6523.06	37.8084
		9439.77	33.4301
		15838.7	55.7522
		7272.75	28.6213
		2593.05	39.3594
		2439	32.8374
		2753.38	38.386
		1366.8	29.2162
		1160.09	44.43
		7612.81	48.8775
		1833.77	42.6518
		871.674	59.8211
		1314.95	71.2904
		5654.22	31.3945
		64.1232	50.3095
		4289.77	30.0879
		5011.88	33.9752
		4222.66	41.276
		2623.89	45.7106
		1271.41	47.519
		1412.81	45.0227
		767.684	31.52
		3100.88	27.6003
		5473.4	41.7606
		6417.27	59.2306
		7198.31	21.9889
		4890.02	36.8242
		6444.38	63.1243
		2263.8	51.2224
		6460.99	79.0498
		6227.38	47.5342
		5206.46	35.7858
		2103.23	58.3307
		6875.68	37.0881
		1267.14	40.4973
		25370.2	34.9984
		2544.39	46.7554
		4460.41	36.3244
		6705.77	92.3146
		5869.11	58.1901
		2704.87	58.9537
		3078.85	38.9225
		2222.99	23.077
		2428.92	30.2004
		2116.21	43.1169
		6720.92	51.813
		2130.99	31.2366
		4341.7	57.381
		13959.7	31.2388
		11883.1	46.6754
		3352.87	63.4986
		3814.02	68.567
		2025.48	77.1765
		7298.03	65.5861
		9126.8	49.3577
		7054.68	43.8091
		2933.4	59.0186
		9869.38	43.7399
		5590.65	46.4461
		3000.81	87.6572
		6724.11	55.7349
		14673.8	43.7897
		3090.9	42.416
		3229.84	35.0763
		2512.24	42.5372
		9231.5	52.3776
		2303.5	31.7212
		12192.7	60.8919
		10995.5	44.6441
		2606.15	39.7185
		2418.13	89.219
		1793.07	61.3137
		4420.42	71.7339
		15797.9	83.4584
		6895.7	91.4168
		5568	52.715
		774.56	61.7312
		8555.47	54.9345
		3722.77	69.3868
		5163.84	58.0689
		1790.23	40.2442
		5988.08	57.9132
		7176.14	36.5732
		6772.63	37.8668
		3272.29	36.2617
		3120.32	34.6328
		590.592	51.0342
		611.831	38.5893
		377.348	53.682
		2113.93	80.1768
		2252.9	68.3506
		-309.043	54.4369
		8904.51	71.3099
		738.241	52.9898
		6934.88	43.1039
		1254.81	49.5935
		4221.3	75.725
		2075.54	46.2687
		1096.7	44.7436
		10001.1	55.4861
		956.126	56.7559
		4150.16	59.9985
		8681.01	51.071
		7421.76	51.0126
		1935.99	40.3285
		2054.56	50.1084
		441.517	59.2457
		4826.58	52.3732
		3854.78	52.0639
		10266.1	77.3193
		3093.22	41.5724
		3329.38	51.2787
		3186.52	71.9351
		8900.1	54.411
		4982.41	46.6948
		3661.73	29.8889
		5595.47	44.6549
		3107.83	66.1247
		6873.72	67.838
		1681.84	56.5936
		2420.44	60.9547
		1252.36	54.7852
		2927.6	51.8779
		2448.57	39.5649
		7441.01	102.752
		9874.23	45.1828
		3646.52	49.6325
		7184.14	58.1209
		368.365	46.4266
		3600.96	52.7302
		3405.44	32.0219
		1054.51	39.3508
		6234.13	66.9835
		2316.74	49.574
		3668.95	53.7339
		4763.07	53.8918
		11441.7	50.4199
		11237.3	63.8144
		726.725	58.9321
		6203.76	48.2891
		25550	62.934
		1454.19	48.3367
		2009.09	54.1925
		2671.58	69.7416
		1175.82	47.4109
		7242.81	80.6809
		3161.78	69.8649
		2597.02	31.4594
		2925.41	75.0522
		10709.6	39.5649
		3568.55	39.9305
		7034.6	74.691
		3745.68	53.2904
		3965.6	32.7249
		1676.31	49.4486
		483.381	83.0193
		3769.65	54.4045
		4605.03	55.9404
		1122.44	37.9836
		2776.09	49.7709
		2947.85	66.7434
		9736.56	56.4768
		20581.9	57.3573
		5483.24	85.4594
		10449.2	38.5158
		245.185	86.6816
		7625.2	59.5161
		11590	47.2919
		4087.89	59.1268
		1380.59	54.3288
		10671.8	62.7609
		4291.22	49.2755
		631.659	32.9001
		7062.82	50.8893
		5808.6	39.1063
		6173.31	52.4143
		1775.01	50.4696
		4764.73	53.7447
		838.102	57.9954
		1237.2	46.3595
		6095.83	66.0122
		11177.2	37.2308
		-129.442	39.2751
		3964.65	24.1478
		827.929	46.3617
		6045.81	78.0937
		3138.53	46.4244
		5215.03	74.0334
		2598.89	30.8948
		812.415	47.5774
		2183.66	45.4964
		960.443	32.2144
		2903.25	81.345
		6413.21	53.2666
		3943.15	37.4753
		5662.97	46.2687
		4626.12	33.2116
		5356.52	67.7168
		2975.08	52.2434
		4751.33	97.9064
		10478.5	54.5148
		-1565.8	32.7746
		1399.21	28.193
		5714.82	38.3211
		15625.1	62.616
		2045.44	59.0921
		3477.77	47.3849
		1547.87	48.9684
		4189.66	40.852
		1840.77	40.547
		1754.8	45.0724
		1060.84	62.0363
		2415.52	44.4646
		2579.75	41.0078
		2694.04	55.67
		308.236	23.3193
		5899.41	70.6761
		3517.97	40.3545
		2125.77	64.5867
		2635.46	55.5488
		7051.65	89.1996
		3741.19	50.0586
		1016.78	68.3852
		8058.3	87.6615
		964.528	65.3438
		401.138	49.8683
		7397.68	109.884
		16371.8	107.898
		1961.83	34.9443
		4416.68	44.0016
		1460.87	36.8934
		2644.73	36.2487
		2085.42	42.4658
		857.136	61.0888
		2655.24	49.6606
		3652.24	38.7429
		2155.43	41.3928
		2140.67	36.7095
		3146.35	110.232
		9969.93	57.3399
		4253.47	61.9432
		2756.68	43.2099
		1825.46	49.0981
		856.695	38.9376
		6719.92	56.9852
		610.985	60.0396
		1859.62	66.3713
		1241.8	51.4171
		12355.9	98.4992
		6165.08	53.4375
		2925.5	52.9011
		1064.65	48.2112
		2786.22	55.0837
		7043.33	77.7368
		4239.72	56.3167
		3067.16	85.2106
		1075.85	60.2992
		3360.89	62.3586
		909.738	55.3087
		2639.73	50.2079
		4007.88	61.2964
		1679.76	52.1375
		1287.43	31.9526
		8125.51	59.5421
		2752.63	36.4283
		1975.22	60.243
		1428.46	62.0189
		2152.84	57.3789
		5866.91	71.8442
		6726.87	68.1278
		4947.42	38.665
		4292.58	69.6442
		2931.66	41.3842
		3931.7	36.1298
		3246.57	41.6719
		885.96	45.5094
		1101.42	32.4696
		5682.43	58.1922
		3259.74	45.8101
		2895.79	43.6577
		4728.92	58.3502
		2755.86	61.0066
		2236.49	42.7773
		5432.23	50.8287
		2214.54	62.5273
		1754.06	44.4148
		6284.49	80.5208
		5713.22	61.7507
		1178.41	61.2899
		9907.89	85.7298
		2893.83	67.7038
		8227.2	75.8721
		1722.5	62.8583
		3222.88	53.0892
		3527.87	65.2789
		1713.6	48.7672
		4649	71.1606
		4310.46	63.6457
		3664.82	87.7459
		9134.41	78.0158
		5608.98	44.8085
		3033.14	52.8773
		4893.18	72.8977
		1553.77	92.9419
		5671.53	64.9047
		1796.1	67.176
		4514.36	87.8584
		2176.72	52.4252
		3447.65	66.6547
		2599.1	61.6837
		1283.12	45.8843
		422.838	44.0973
		4431.83	49.4083
		3187.44	56.3756
		1622.12	33.6678
		1267.44	47.5333
		1476.26	36.2115
		611.238	53.2203
		344.688	27.2312
		1477.55	38.3126
		803.131	52.6159
		449.894	38.6315
		930.881	39.017
		7503.06	65.4915
		571.292	27.0861
		978.303	32.5114
		125.274	59.7188
		815.712	55.0074
		967.344	32.8564
		369.885	46.7052
		185.487	51.8973
		664.349	72.0542
		710.862	58.7385
		418.164	47.8664
		1272.56	38.7148
		924.872	23.1147
		782.209	38.8909
		125.51	34.1818
		354.737	48.7016
		-80.2733	59.281
		774.599	28.2401
		1057.98	43.6856
		1473.55	55.7165
		2112.68	25.537
		1128.69	37.2561
		1218.03	48.0996
		377.374	42.0628
		532.74	59.4214
		1286.56	23.7524
		793.76	48.6802
		898.074	34.5411
		2695.98	49.1323
		2380.53	59.2167
		1533.45	60.7468
		681.451	33.625
		1104.56	19.1028
		3155.5	74.3172
		337.713	34.0295
		779.639	31.2836
		656.942	49.2227
		1176.85	71.2309
		983.274	53.2322
		4000.95	27.3716
		709.858	46.2507
		276.353	39.5809
		1835.43	40.6493
		222.725	49.08
		460.809	39.1978
		848.156	42.5648
		337.848	30.7482
		782.46	46.1175
		1634.15	56.5731
		2004.72	99.0737
		1140.05	37.349
		1101.01	53.7272
		-348.173	51.2572
		1713.7	36.014
		1154.46	37.7059
		370.037	41.4655
		3473.05	31.3763
		-180.12	55.1763
		523.218	39.7285
		2585.46	45.3346
		985.857	44.1758
		1626.7	29.3419
		1641.21	48.8516
		511.121	26.4032
		3387.02	89.4747
		3149.81	41.0087
		1023.02	57.4202
		313.476	44.6588
		2157.39	39.2335
		2537.07	48.4899
		757.743	34.0724
		794.305	65.8842
		2726.59	47.5666
		2562.09	22.2771
		1240.86	33.3442
		1788.22	33.2895
		2530.06	42.3578
		1328.93	35.5048
		788.98	37.4917
		565.049	48.804
		1313.08	45.0229
		774.975	28.4186
		452.784	65.5891
		1090.29	33.1301
		1623.2	66.6813
		511.83	39.3715
		1417.93	49.4559
		1447.15	34.4864
		1085.52	30.0129
		501.854	33.7202
		1798.75	53.7438
		746.715	31.512
		385.542	32.5304
		1092.42	62.8098
		903.564	48.1639
		1079.18	53.9604
		1633.09	41.2894
		4108.44	45.0919
		-835.449	37.525
		1309.7	30.3555
		2077.79	42.7171
		2528.35	28.7018
		858.643	33.8963
		597.701	55.2786
		2806.53	46.7695
		1345.78	23.0671
		1173.94	28.5423
		128.095	28.4472
		1106.11	57.8366
		934.117	38.8409
		3508.1	40.3709
		-225.348	37.9081
		667.931	51.093
		1247.2	30.0034
		1635.13	34.9266
		1098.66	71.9638
		4476.27	51.2858
		1129.66	80.2469
		602.287	65.8556
		1620.79	33.9224
		558.642	44.4708
		723.694	23.336
		1677.17	38.0128
		787.868	27.5025
		476.787	47.3905
		532.351	34.2484
		2056.26	40.6803
		875.901	61.1703
		402.455	57.6415
		986.186	36.4114
		891.481	49.6178
		287.807	48.0211
		1132.07	32.4686
		1067.18	78.429
		1355.7	40.4495
		1479.26	46.7766
		1570.39	47.8878
		595.451	51.45
		357.136	51.5333
		1492.49	68.4754
		-33.1369	64.1304
		688.59	83.9043
		431.893	45.7629
		1020.56	62.0888
		464.72	75.2333
		2528.4	45.2513
		1245.34	17.7869
		3858.07	44.0949
		719.338	35.8213
		1072.87	50.5505
		841	56.5326
		5188.52	37.011
		584.146	59.8973
		2109.21	42.66
		1297.12	102.929
		869.481	74.479
		464.915	33.6036
		1004.18	30.1747
		803.443	49.594
		1207.55	89.7579
		963.58	74.0626
		1438.61	57.168
		1531.46	29.1206
		1884.66	37.8867
		1578.86	52.3709
		-3081.84	43.4738
		921.281	82.8144
		200.366	55.9378
		2218.24	47.8236
		1943.76	46.8718
		100.006	46.246
		2133.01	46.76
		753.477	60.7206
		1450.24	49.7486
		1675.02	85.746
		623.936	44.6612
		820.454	38.7624
		678.816	57.049
		2525.05	55.3809
		1277.22	73.9769
		1111.16	51.2668
		1954.44	47.262
		1352.08	59.143
		256.834	33.3513
		189.591	56.4565
		623.365	57.839
		1520.6	56.5445
		1853.21	67.9282
		1115.72	50.9479
		1845.97	47.6285
		1994.04	129.874
		1826.7	44.6041
		777.783	50.4553
		1334.47	44.0116
		501.888	50.6481
		747.619	23.7524
		1500.63	42.1865
		954.672	44.6707
		29.4484	41.6059
		1033.36	35.3906
		1552.12	68.5064
		1282.67	49.4107
		3458.08	37.882
		862.464	62.0341
		1489.02	65.1132
		604.203	42.8861
		404.502	36.4043
		2837.4	75.2404
		959.44	55.5808
		3726.72	67.0216
		2435.4	61.7533
		1104.54	43.7784
		3435.37	40.6184
		101.767	56.0353
		2056.21	54.8765
		1307.67	43.3787
		1444.2	43.5999
		1172.45	52.328
		1699.13	43.4834
		711.412	58.7313
		196.249	47.9164
		168.305	37.0087
		1702.75	39.2835
		908.479	45.1014
		1063.73	37.9748
		612.891	42.4483
		465.997	53.7224
		1161.27	44.6921
		1466.13	36.3614
		907.977	58.3958
		1017.64	45.1014
		6343.63	43.5309
		3854.65	26.4793
		1567.16	34.4888
		742.968	40.6303
		573.646	29.2633
		490.268	38.0485
		716.508	42.9027
		788.478	41.939
		806.744	31.9022
		1459.56	27.0313
		2816.31	32.4852
		1604.65	73.3606
		873.063	35.8046
		3087.31	37.337
		511.502	22.9552
		1587.23	29.6417
		923.098	31.4525
		218.844	44.1211
		3149.5	82.4361
		1278.78	54.1341
		278.315	34.8195
		1063.01	40.7041
		4138.08	32.1782
		464.231	51.895
		822.28	25.6988
		916.068	47.9307
		330.832	26.7981
		1450.84	45.5583
		1083.89	31.098
		2405.81	47.193
		2329.49	40.1949
		121.842	43.7403
		611.195	37.3585
		2125.78	104.028
		415.936	70.2553
		2036.33	45.8819
		3571.35	74.31
		2535.24	70.9335
		1814.73	49.1085
		8311.62	71.6426
		1775.03	32.8374
		2515.02	42.1127
		233.488	35.1193
		981.933	40.785
		1240.82	38.7695
		1633.29	46.4244
		2056.38	31.4834
		6442.05	44.4209
		13689.6	34.0771
		3276.05	94.8144
		2053.77	39.155
		527.068	47.1383
		3377.72	63.8008
		6056.46	74.0335
		5397.26	38.102
		3433.22	45.406
		4491.95	64.3788
		5036.1	94.5018
		5058.81	51.6515
		3367.56	67.2828
		17556.3	65.6049
		2624.25	54.9697
		1934.72	60.8626
		12245	81.1306
		2280.09	100.587
		4423.47	71.4325
		3653.13	61.4552
		4080.79	60.967
		4757.47	54.2256
		4983.75	41.3229
		3434.1	59.4235
		1949.96	55.5322
		11229	67.4034
		5587.49	39.584
		8817.03	112.512
		8891.99	82.2201
		6009.9	54.8402
		7242.06	95.2667
		3640.11	84.2432
		3119.88	37.7533
		3514.51	67.6167
		5845.27	61.7816
		8848.93	116.415
		2801.56	58.0058
		2348.95	50.2715
		9406.8	46.9514
		2432.32	39.102
		3395.94	62.3186
		2380.76	30.5236
		780.317	52.1335
		929.28	57.9052
		2066.26	41.538
		13250.3	74.6784
		493.346	58.1436
		2051.97	58.271
		28823.7	89.0925
		4218.34	49.7969
		13184.1	42.2581
		10817	78.1845
		2311.8	43.3419
		4473.81	53.0979
		3830.49	45.6132
		5844.47	122.322
		2174.59	115.729
		2430.41	62.497
		7169.33	82.2167
		9374.15	81.9723
		20570.3	83.6661
		2483.01	63.4012
		4965.09	78.3771
		5441.15	53.5825
		10299.2	44.3694
		5942.53	69.0429
		4926.41	44.6701
		3191.56	46.2773
		8040.67	44.1423
		1935.89	46.803
		698.213	52.9681
		2857.6	40.4518
		8584.87	85.2582
		5536.13	100.675
		5505.76	53.4483
		5305.65	48.3259
		3349.71	41.7498
		5771.2	83.5687
		2220.22	56.1437
		2292.85	44.4776
		4052.48	100.801
		1562.42	48.6244
		2783.6	43.2791
		1798.8	44.8561
		3368.02	77.8038
		7969.01	58.9126
		2362.15	96.1045
		2338.19	60.4679
		5659.41	42.7275
		4687.31	61.3808
		17248.8	71.948
		2276.34	58.1338
		2450.65	39.4697
		1180.44	63.5072
		2618.62	49.1133
		13820.9	56.1956
		1363.02	51.6529
		2696.74	76.9602
		1611.1	40.9472
		4223.72	59.4339
		2883.87	52.86
		7740.38	71.126
		3255.64	41.2522
		2497.63	51.4149
		4075.53	65.6992
		6793.35	65.8653
		1413.69	49.892
		3840.21	62.4295
		6137.63	22.769
		6838.82	63.2697
		5365.15	61.057
		2631.91	59.6156
		12169	72.8101
		6369.76	51.1824
		3643.37	73.416
		1612.81	35.1092
		2480.74	41.1759
		656.009	42.2648
		1135.22	42.726
		3538.58	70.5355
		4726.89	41.925
		5040.77	42.264
		876.944	44.0064
		5032	67.2154
		2251.23	43.6994
		4224.51	29.9102
		3493.65	75.4825
		6633.27	37.56
		9164.22	46.3505
		3857.57	53.9908
		6028.31	69.8019
		3444.94	53.7272
		13992.9	79.8221
		2377.32	59.442
		5174.47	57.2514
		2485.43	88.3033
		2782.09	51.1057
		2790.2	71.9181
		5316.11	73.4021
		3090.72	44.2071
		1245.71	52.417
		2279.94	65.7351
		1562.2	58.2759
		6146.14	57.1706
		5147.2	65.0857
		5645.02	54.9258
		9596.07	58.5711
		5147.62	48.9664
		2233.73	49.2436
		6726.35	56.2234
		4467.45	50.5947
		5301.17	63.8698
		4690.46	64.5486
		1502.1	59.0756
		3762.51	53.1485
		5446.7	36.9143
		4693.51	53.0269
		3283.75	37.8264
		1789.2	57.7001
		10227.9	59.1423
		4405.96	49.6413
		5721.02	51.7107
		6008.47	39.8866
		4727.76	82.1469
		5271.83	60.7106
		10948	40.1137
		3613.23	31.3305
		4511.14	62.2156
		6184.9	49.8291
		10063.5	59.8529
		4737.29	59.6619
		1343.65	46.7571
		642.075	47.8952
		3424.9	59.276
		7318.22	46.5938
		1794.87	79.4247
		4948.5	64.5369
		14229.7	84.1409
		3824.83	26.3824
		2362.59	36.5884
		13616	63.5483
		4981.91	102.019
		3572.04	40.7374
		3325.6	52.542
		6562.17	59.6091
		11217.6	41.5334
		6828.89	57.1366
		6975.76	49.9613
		3975.17	38.7191
		5465.61	37.2568
		8683.72	114.479
		3263.26	43.7031
		2660.19	45.6197
		2496.86	45.7625
		4968.85	64.5585
		2334.15	76.3783
		2295.55	63.0356
		7869.37	80.1725
		2880.41	48.4319
		5262.53	71.2472
		1972.84	78.2776
		2503.96	63.345
		2567.92	38.254
		3436.72	35.8118
		2272.4	64.4634
		2750.98	36.1406
		2667.91	41.62
		7368.88	42.3122
		3898.34	64.3271
		2807.6	44.7869
		4284.86	79.4803
		4607.54	44.0341
		1941.3	39.9651
		9532.34	110.987
		2718.74	30.5422
		9119.21	46.0307
		1678.41	65.3221
		4098.79	71.7836
		4861.03	95.6069
		6507.01	35.5176
		3198.53	49.6628
		5292.72	49.1328
		2575.36	53.5176
		556.377	29.6748
		3221.06	52.9011
		4579.7	93.8353
		2376.02	94.2614
		2927.03	43.3873
		5598.5	52.0639
		3611.05	44.6398
		913.144	53.3294
		2120.01	54.7657
		11338.8	59.2933
		5228.71	92.6564
		3754.17	60.3403
		11628.4	68.6362
		10216	33.8671
		1505.91	35.7426
		7220.9	77.038
		3938.47	67.5805
		2701.1	53.3013
		6295.85	61.4738
		3156.67	73.9187
		24869.8	101.906
		4304.51	48.0706
		4431.48	61.7183
		2528.37	51.0083
		3205.72	58.9645
		16329.7	68.2641
		5994.31	46.459
		2584.37	84.0468
		6303.18	55.9036
		1857.95	67.7298
		2217.72	51.4344
		3674.98	46.299
		938.731	43.5301
		2301.45	41.5529
		7148.05	52.7777
		4060.11	89.6755
		2846.7	42.2819
		8029.71	69.6875
		1870.24	87.4236
		415.6	58.6573
		2128.89	53.2191
		3624.05	44.5143
		2604.7	73.724
		6198.33	67.6584
		4141.12	50.0305
		1508.99	39.4741
		1339.91	62.2136
		1310.8	48.9705
		1222.22	34.4771
		1517.88	41.1852
		7595.88	82.1518
		6165.04	66.8148
		585.811	58.9602
		1238.25	76.1901
		3638.32	44.0838
		2757.03	53.4765
		3708.52	91.3303
		3329.74	56.1696
		4281.2	88.2304
		2072.87	37.3022
		2106.63	61.8026
		1518.68	56.7278
		3220.96	56.5331
		2278.12	89.6062
		1316.91	51.5296
		2243.77	66.3129
		721.723	41.3474
		3844.23	52.5203
		5745.74	66.6958
		1228.6	57.6882
		765.465	53.55
		547.267	66.2523
		3583.58	57.8916
		3343.51	88.2586
		1316.17	27.0162
		1617.43	47.2984
		1915.42	84.8191
		4037.75	88.9724
		7705.01	66.7455
		3947.42	46.8657
		2955.84	68.1668
		4234.57	56.7169
		3106.75	64.1021
		3590.9	67.2085
		3178.41	54.7463
		4066.53	38.8749
		4922.57	52.4403
		2046.5	40.8369
		3458.22	94.5946
		7479.06	70.9703
		2297.84	64.8311
		5612.05	57.7683
		2384.85	41.0705
		5736.81	81.451
		1885.36	62.9643
		1999.34	36.8696
		3702.21	47.5082
		3119.55	62.9729
		2180.45	75.6514
		939.376	77.0618
		12777.7	45.5094
		1090.3	54.6208
		1246.22	58.2874
		1999.89	61.6123
		2840.94	53.6582
		3129.29	55.5099
		7655.07	69.045
		1694.89	46.5261
		3331.99	47.2681
		4043.09	49.5373
		2025.51	59.3539
		2592.63	61.2445
		4430.57	88.6631
		2379.5	54.0065
		1941.86	55.2546
		3926.1	90.0172
		9572.45	73.9468
		5268.82	129.21
		2042	44.8648
		3218.48	59.4318
		16091	52.105
		2101.02	42.9958
		6994.34	60.1737
		4578.79	54.9193
		3757.05	39.3291
		1538.83	56.2908
		3815.7	42.6215
		3914.76	44.9491
		5453.92	79.5517
		9016.26	73.8581
		3000.79	43.3808
		663.353	57.2145
		4621.31	47.426
		2451.17	58.3934
		2441.57	63.027
		2755.16	85.1306
		3092.68	72.982
		2879.19	69.9168
		2842.93	105.369
		2957.41	52.7064
		4571.79	68.7595
		10645.3	67.5459
		2000.32	52.6826
		29930.4	93.4567
		3285.11	53.6041
		28378.1	77.4101
		4177.68	45.1828
		3825.67	47.8111
		2051.64	64.9522
		4507.6	45.0421
		3099.67	53.02
		1861.92	54.0778
		985.377	53.8702
		3417.86	54.8717
		4183.85	90.2098
		5636.96	54.6403
		7609.9	59.607
		5241.14	49.7709
		1621.98	62.6095
		1115.55	55.5921
		820.783	93.5411
		6583.43	77.5875
		3087.79	56.2064
		22939.7	58.8477
		4243.61	59.5313
		12967.9	67.5178
		5461.41	57.1431
		3322.75	62.5338
		1879.34	42.6561
		10764.8	58.3848
		3083.57	81.2325
		3332.75	75.8526
		4957.11	64.3076
		3447.65	53.8918
		1768.09	62.8518
		1208.84	52.8383
		3303.63	67.1003
		18407.6	88.847
		4538.11	79.5798
		2565.4	70.2045
		8687.26	121.769
		308.769	55.2027
		1070.19	86.6621
		8133.63	69.7892
		4537.85	75.4286
		5187.89	68.6448
		13979.9	90.4412
		16223.4	67.2907
		20966.3	77.8125
		1993.82	65.0171
		6890.92	62.8994
		8517.99	79.1212
		6287.82	77.4058
		3559.59	73.9706
		2892.85	66.5444
		16949.1	123.527
		4584.56	56.4876
		11551.5	81.4445
		2215.61	70.808
		3441.46	68.342
		6605.7	78.1867
		10059.3	80.6852
		4780.56	62.0254
		14259.2	60.9893
		12914	69.1899
		3331.8	75.4632
		18547.5	94.3242
		5091.72	62.7436
		17272.2	110.996
		18918.1	185.012
		12781.5	141.919
		9619.99	62.1314
		5925.24	91.313
		5615.06	82.1735
		8670.78	79.238
		9678.05	62.3088
		8709.32	80.1206
		40356.2	76.7179
		25757	60.7643
		6280.01	80.5251
		8995.15	63.2303
		12080.1	75.3356
		21389.7	71.4808
		19349.5	85.3599
		12601.6	59.0532
		10220.6	67.7687
		8518.01	70.3581
		13861.7	44.523
		12464.2	67.7947
		8361.65	69.9233
		2914.65	41.4858
		2580.48	54.6186
		7697.51	95.9487
		4807.39	68.4437
		3261.76	70.901
		7947.86	75.3854
		8291.81	43.0585
		7057.48	64.273
		12887.2	60.031
		5763.39	79.5041
		11269.2	51.0256
		3295.85	64.4439
		5182.25	58.8174
		8256.87	57.8786
		6434.85	71.9783
		2921.62	52.2218
		7741.42	71.987
		61.7098	92.6693
		1519.01	88.1201
		5081.1	50.3052
		7076.45	63.1352
		4474.84	82.2968
		783.929	78.7837
		4917.97	53.6603
		5991.48	74.241
		1417.98	51.1121
		8366.07	56.7645
		19395.2	95.9206
		17921.5	75.1366
		5698.26	81.4012
		5287.51	79.2445
		8241.62	87.4019
		3122.49	60.4074
		5398.89	74.0701
		6510.39	86.9758
		43370.9	79.7723
		20625.9	87.3024
		25219.5	56.1156
		4303.62	47.8716
		28087.6	73.4731
		6182.92	67.8012
		22680.3	68.8309
		3134.43	83.1015
		840.492	55.2784
		2341.99	68.5561
		5296.83	60.1002
		6110.78	86.5064
		15059.9	45.3126
		5682.83	53.9048
		6890.27	60.4917
		5213.53	59.3777
		8603.18	90.4585
		10541.2	83.7115
		14695.9	103.503
		5807.11	83.2443
		12134.5	39.7466
		2583.51	58.8953
		10367.7	58.7352
		11623	47.2876
		36734.6	79.5863
		2911.19	60.2257
		7953.7	64.6234
		5513.98	106.886
		6715.5	55.0643
		7128.41	50.6297
		5134.79	82.8441
		4266.7	49.7103
		14724.4	75.6796
		2675.94	62.6766
		29724.3	111.911
		16534.5	60.9936
		1865.11	93.6731
		9184.86	64.4158
		7727.02	102.287
		1852.83	68.2403
		5649.59	84.8559
		6587.83	46.9198
		8600.1	61.6685
		8134.48	89.1022
		7347.85	121.464
		6098.75	57.0955
		5989.6	85.1414
		7068.93	59.9552
		3565.62	80.4472
		6660.38	67.6151
		7244.21	70.7085
		5837.11	80.9015
		9610.77	65.6423
		16438.8	63.6673
		17722.6	73.2849
		11186.7	56.1545
		7363.04	100.812
		8489.85	88.5181
		1204.9	70.4554
		6872.53	77.4253
		4086.39	91.6634
		7653.51	95.0532
		16394.4	77.6243
		6688.1	121.896
		9869.15	67.6173
		6171.37	101.72
		2172.5	67.9829
		4373.9	64.0329
		4153.95	90.8263
		4788.16	63.5245
		6126.44	125.978
		936.464	52.4403
		13681.4	77.196
		4576.08	65.6337
		8253.82	64.6278
		4891.3	72.5083
		14224.9	60.6323
		15764.2	84.354
		8343.57	63.5656
		3833.13	64.366
		4621.78	44.1271
		4194.79	91.6591
		650.918	73.2957
		13147.5	68.0348
		16493.2	95.3301
		11464.4	95.6589
		913.331	99.6002
		4392.27	56.5569
		23059.1	81.3471
		4357.85	98.3456
		8234.39	74.9527
		12411.4	80.9989
		13218	70.3321
		4202.1	70.6285
		7720.46	49.1566
		1644.8	86.9693
		4827.64	100.55
		3149.01	75.6687
		5793.53	86.0413
		2795.46	67.5675
		3779.61	69.9536
		34360.7	71.3575
		34134	81.1654
		17607.9	90.4758
		17384.2	69.5015
		7894.6	50.7703
		3575.55	67.6195
		11813.2	93.1063
		9624.34	77.7432
		23317.1	99.6997
		17229.9	71.5089
		13640.4	90.9431
		8421.92	73.0837
		2221.43	57.2015
		860.657	54.0432
		870.493	55.4515
		10917.8	66.2891
		8672.4	49.6
		1728.72	59.2003
		10123.9	67.057
		6522.37	54.4824
		686.401	80.0687
		-308.412	78.23
		10043.6	72.4694
		-748.664	82.4049
		3940.96	51.8324
		5871.83	39.4979
		32080.3	78.9438
		10471	76.7222
		9444.19	46.273
		5130.7	77.568
		4939.06	62.4321
		4197.65	68.6708
		13974.7	77.8341
		12680.7	77.7649
		4758.48	62.7047
		13772.6	66.5054
		2669.43	52.6501
		3042.06	72.8998
		4064.11	75.2794
		1987.07	61.5928
		2529.34	75.7271
		13413.9	65.5515
		17174.6	93.4243
		2412.12	95.7346
		1202.37	57.1864
		4204.46	67.8877
		3575.6	37.0059
		9501.81	92.4573
		2034.47	50.9974
		10235.8	98.2763
		17583.1	72.2768
		6791.93	65.4606
		9880.03	57.4438
		6259.74	72.0064
		17202.1	74.9852
		29285.6	70.8015
		4731.91	57.9478
		6615.5	77.7432
		3529.04	58.5405
		16623	62.7263
		1096.79	62.4386
		5673.19	61.6837
		11252.9	83.7872
		13244.4	77.2738
		9870.25	86.0261
		-2260.96	57.5044
		2836.89	65.8738
		645.962	97.5473
		10477.6	59.4101
		5954.1	58.7655
		8925	51.3003
		23131.3	98.0903
		2163.46	44.0601
		-1672.91	93.2015
		10145.2	56.7559
		21081.6	72.1535
		15973.5	67.0808
		6762.75	70.5787
		4296.48	57.8353
		1606.62	94.3545
		5656.53	84.1982
		12840.3	57.6644
		20227.8	60.1002
		1323.38	75.8786
		10453.5	58.5059
		3878.81	96.085
		7891.51	65.0193
		11630.5	93.4156
		3179.23	55.4904
		6323.29	52.0639
		1765.25	41.6546
		5430.61	61.6144
		1897.57	83.0885
		8560.19	102.559
		4612.46	80.1076
		3155.7	66.0014
		6830.28	59.7649
		5279.77	65.6596
		3309.54	94.6422
		4272.02	75.0825
		3381.36	55.5813
		7831.3	100.66
		9676.9	99.9225
		10458	55.0729
		3778.46	68.2143
		3553.94	67.5762
		4443.67	100.422
		6607.65	65.1513
		9220.36	64.0761
		16028.3	86.965
		1688.29	63.12
		3730.94	56.148
		16364.5	77.4123
		5275.7	72.1643
		5564.16	113.451
		7583.9	72.623
		10476.2	112.755
		2716.01	63.358
		3371.46	73.3649
		5286.45	79.3159
		11030.1	100.122
		4107.25	68.011
		4574.19	74.148
		3464.52	64.4525
		4237.95	64.0069
		8127.77	119.748
		6710.87	98.5381
		1903.34	61.9346
		11519.1	38.797
		6443.55	52.5441
		8460.66	62.484
		3917.99	59.1008
		1258.08	46.1692
		1881.27	53.0135
		9136.99	72.6338
		8772.81	60.8292
		3737.69	62.2136
		4296.61	59.9531
		2784.15	64.5694
		2135.95	78.6583
		1107.51	62.4884
		8553.92	83.5406
		7362.32	76.3826
		2505.57	54.7917
		15393.1	78.8378
		10009.5	53.6582
		8528.96	74.5958
		7835.98	77.0207
		4401.98	72.3374
		3749.86	68.7032
		5127.41	50.9477
		6131.94	58.4086
		7809.61	73.5618
		9620.33	67.5697
		-386.657	70.8188
		5641.95	65.85
		4157.13	93.924
		3618.69	69.9968
		6517.27	65.4108
		18302.1	68.5778
		11377.7	65.4822
		17769.7	102.216
		12018.3	110.04
		1181.89	58.6941
		5323.44	61.9281
		1877.27	54.1081
		8734.14	68.1603
		8653.25	109.754
		3974.08	86.3138
		8667.7	73.7976
		4806.8	45.9399
		29402.6	52.4468
		3905.44	44.8496
		28916.1	65.5147
		9006.96	100.829
		7848.72	79.5603
		2779.76	60.0721
		2865.66	69.1251
		9258.13	63.4293
		7191.49	65.8175
		1840.29	67.0765
		3405.94	70.1266
		820.913	63.1871
		5366.77	81.1568
		72.7657	62.59
		2924.65	54.8415
		2217.82	88.7237
		25603.9	78.0656
		2889.78	105.296
		4614.15	98.2049
		5447.02	59.3496
		10120.7	107.234
		9006.5	75.3875
		5899.78	48.6071
		1777.4	78.8789
		3678.65	64.3033
		5708.84	72.8371
		6149.26	81.9226
		2800.74	87.1467
		7132.22	88.7799
		7636.9	70.9681
		14308.7	74.864
		6100.96	66.5725
		6079.78	81.0681
		1757.22	70.3819
		7222.04	58.6681
		6702.2	76.8066
		12418	75.3637
		5690.64	68.5107
		716.491	85.2755
		4818.05	96.9698
		340.178	98.5035
		2133.33	47.8781
		8189.85	49.2734
		13540.2	91.2632
		8730.68	79.2726
		2746.74	61.5041
		10827.9	68.6189
		933.756	79.9843
		12118.7	75.6103
		22616	69.2743
		5020.46	75.4113
		11350.1	160.062
		15649.4	71.0654
		13993	60.4831
		5511.34	72.8371
		11332.1	62.7955
		8578.45	88.7604
		3676.19	80.404
		3483.83	69.9081
		5732.09	57.5822
		8791.12	80.5489
		557.558	56.4422
		4444.51	63.1654
		5609.78	92.2324
		5931.19	107.204
		4753.33	63.862
		5266.01	126.337
		6075.78	57.9197
		4503.16	72.0865
		1852.8	59.568
		12799.6	63.0573
		2017.51	84.6568
		3387.44	98.7025
		6371.1	61.2856
		8371.45	81.8317
		7213.1	111.141
		3964.97	88.5657
		4912.65	86.4004
		4192.11	73.3281
		5345.53	67.2085
		5527.5	89.643
		5415.03	86.4674
		7487.64	75.102
		1709.43	102.966
		15453.4	64.5715
		13904.6	73.4817
		4629.01	86.7184
		1521.31	72.6684
		8042.67	56.4054
		17448.2	54.5451
		4693.78	100.132
		9504.99	97.039
		1470.41	72.3655
		26.1851	77.5312
		6631.16	81.3882
		2934.81	46.0524
		10224.4	61.9908
		2895.57	90.5559
		6377.7	90.1427
		4002.57	52.4727
		14855.1	70.1937
		32402.1	94.9986
		11290.3	107.158
		27388.1	78.8931
		53300.5	82.4153
		15813.8	77.0851
		18103.4	108.594
		23818.3	79.8423
		17108.1	85.5377
		20401.9	99.5326
		29292.3	59.0568
		40472.8	55.4721
		34461.2	70.9099
		9309.25	103.757
		48482.6	80.9202
		7392.8	112.512
		10611.8	79.8354
		27658.9	104.487
		5406.8	88.66
		31292.4	80.2422
		13602.4	68.5143
		8428.94	101.33
		50759.8	120.217
		43592.9	90.1586
		72913.4	95.5827
		67524.7	93.2775
		46904.5	101.514
		9552.92	75.5552
		14493.3	79.0357
		10919	88.7156
		23932.1	66.5498
		8786.24	88.7956
		57105.4	96.4798
		37971.7	63.0032
		80881.3	124.049
		28875.9	111.233
		46075	110.492
		21244	150.596
		15090.2	126.26
		23256.5	124.779
		66755.5	94.2267
		20657.2	117.863
		10928.1	108.927
		45690.2	83.82
		27134.2	117.081
		119301	93.7121
		20579.9	117.818
		47335	104.234
		26824.3	106.518
		9719.4	77.5997
		8372.69	90.781
		32036.6	75.7221
		24582	106.08
		36919.8	142.529
		48270	113.249
		28713.2	75.9829
		9914.39	72.6519
		40155.5	78.4029
		12768.7	129.727
		31438.6	77.1477
		18577.4	66.9914
		11960.9	69.4635
		81985.6	87.7977
		61605.1	80.2422
		33607.9	83.9278
		21074	76.348
		26790.4	74.1296
		1037.34	95.9965
		62046.1	147.835
		34747.6	131.89
		20711	87.6482
		20415.6	85.0474
		42729.1	137.519
		22065.9	54.3525
		40664.1	87.2171
		22735	79.3347
		22519.2	77.8778
		30309.6	86.1149
		43336.2	75.0649
		7995.5	81.8034
		32681.2	78.4481
		27938.2	99.8421
		5721.15	90.329
		35650.2	85.941
		39947	117.05
		27033.7	89.7622
		27395.6	113.176
		10492.8	93.879
		7187.31	92.7907
		84930.6	126.149
		43924.4	82.0954
		7297.18	70.75
		133527	144.149
		86794.3	122.978
		25802.1	146.719
		26972.1	86.0279
		42637.8	83.9278
		15406.6	77.5128
		83378.5	158.76
		57005.3	100.016
		102211	117.168
		31115.4	90.5167
		125183	103.156
		19106.3	135.662
		67501.2	113.27
		76257.6	103.983
		24284.1	95.6071
		47838	108.128
		53308.9	103.823
		80227.6	90.1899
		112016	112.512
		67162.5	118.809
		36372.7	136.149
		37375.5	110.37
		12754.7	108.799
		28923	116.549
		26651.1	94.9986
		20799.6	70.5692
		27743.3	120.996
		20762.8	104.543
		19189.1	66.6263
		23560.2	52.6244
		20321.3	74.7312
		31990.8	79.2339
		23393	91.8589
		22538.7	76.0385
		17640.2	50.0375
		65128.2	75.0024
		32515.9	114.042
		10757.1	66.1221
		20012.6	82.0016
		9628.44	100.809
		29288.1	90.0265
		36477.8	128.267
		41056.6	95.0542
		88522.3	87.5439
		53788.8	109.268
		36631.2	86.5356
		33855.4	65.5971
		84585.7	89.8213
		39406.4	80.1622
		7913.93	129.518
		31861.4	134.675
		20744.2	96.1217
		55049.1	61.077
		19446.2	103.037
		24205.6	113.708
		24502	130.304
		35626	212.386
		21446.1	91.8867
		51164.8	93.9346
		4919.61	70.2111
		37060.2	87.9542
		38168.6	89.4389
		6605.6	81.779
		11651.6	56.849
		11720.5	142.442
		31684.9	136.695
		36630.8	150.04
		6956.64	101.129
		38120.6	91.8728
		13743.1	145.902
		18047.2	87.0189
		19229.1	93.048
		42440.1	104.15
		30221.2	60.8927
		13301.6	61.9323
		21819.1	130.558
		37275.5	66.0004
		46536.4	100.398
		21742.2	67.2069
		18844.9	114.362
		17779	91.16
		48500.6	81.3444
		33303.5	108.016
		71541.4	62.5686
		23018.4	78.2916
		5285.37	61.9428
		13014	106.82
		48645.1	94.032
		19923.3	70.8995
		44560.9	149.215
		42598.3	86.2818
		13277.5	88.3367
		10382.9	76.5601
		21751.3	87.45
		28866.7	93.3957
		13745.7	97.1057
		31053.2	106.295
		54669.4	96.0626
		61264.9	91.9284
		21745.9	69.7034
		54918.9	96.4555
		34453.9	76.7304
		9794.5	72.6554
		-311.215	78.4098
		23202.7	64.481
		45949.3	73.7472
		36946.5	98.4373
		11430.1	88.8304
		36007.3	78.5037
		25150.4	86.7199
		29163.5	97.6307
		50643.1	87.909
		61286.9	90.2386
		15882.8	72.492
		10606.7	118.044
		26410.1	112.384
		3750.69	86.1983
		33251.2	72.2973
		424528	124.943
		93783	126.545
		27078.9	121.017
		29339.1	81.2957
		23464.2	50.872
		22227.4	106.087
		22656.2	94.9742
		12708.4	83.9661
		32787.3	95.4471
		4026.16	90.3186
		10204.2	78.987
		3055.07	103.163
		9856.53	91.3895
		27821.7	90.6106
		59737.4	96.9214
		10458.9	66.4837
		37748.3	133.04
		10990	110.436
		23067.1	80.7081

## Sheet: Figure 5c
		time(s)	state 2 probability	S.D.
		0.05	0.21	0.102
		0.1	0.38	0.06
		0.2	0.42	0.037
		0.6	0.58	0.07
		0.8	0.51	0.05
		1	0.52	0.05
