# Supplementary material for: Discrimination between cyclic nucleotides in a cyclic nucleotide-gated ion channel
Source: Springer Nature journal article supplement (doi:10.1038/s41594-023-00955-3), 2023-03-27
Supplement: MOESM9 [file 41594_2023_955_MOESM9_ESM.xlsx]

## Sheet: 1a
Sample Information	Sample Information		Sample Information	Sample Information		Sample Information	Sample Information		Sample Information	Sample Information		Sample Information	Sample Information		Sample Information	Sample Information		Sample Information	Sample Information		Sample Information	Sample Information		Sample Information	Sample Information		Sample Information	Sample Information		Sample Information	Sample Information		Sample Information	Sample Information		Sample Information	Sample Information		Sample Information	Sample Information		Sample Information	Sample Information		Sample Information	Sample Information
Merge-Set Name:	Experiment 1 (#01)		Merge-Set Name:	Experiment 1 (#01)		Merge-Set Name:	Experiment 1 (#01)		Merge-Set Name:	Experiment 1 (#01)		Merge-Set Name:	Experiment 1 (#01)		Merge-Set Name:	Experiment 1 (#01)		Merge-Set Name:	Experiment 1 (#01)		Merge-Set Name:	Experiment 1 (#01)		Merge-Set Name:	Experiment 1 (#01)		Merge-Set Name:	Experiment 1 (#01)		Merge-Set Name:	Experiment 1 (#01)		Merge-Set Name:	Experiment 1 (#01)		Merge-Set Name:	Experiment 1 (#01)		Merge-Set Name:	Experiment 1 (#01)		Merge-Set Name:	Experiment 1 (#01)		Merge-Set Name:	Experiment 1 (#01)
Run Name:	Experiment 1 (#01)		Run Name:	Experiment 1 (#01)		Run Name:	Experiment 1 (#01)		Run Name:	Experiment 1 (#01)		Run Name:	Experiment 1 (#01)		Run Name:	Experiment 1 (#01)		Run Name:	Experiment 1 (#01)		Run Name:	Experiment 1 (#01)		Run Name:	Experiment 1 (#01)		Run Name:	Experiment 1 (#01)		Run Name:	Experiment 1 (#01)		Run Name:	Experiment 1 (#01)		Run Name:	Experiment 1 (#01)		Run Name:	Experiment 1 (#01)		Run Name:	Experiment 1 (#01)		Run Name:	Experiment 1 (#01)
Date of Measurement:	2022-11-23 10:25:47		Date of Measurement:	2022-11-23 10:26:28		Date of Measurement:	2022-11-23 10:27:08		Date of Measurement:	2022-11-23 10:27:48		Date of Measurement:	2022-11-23 10:28:29		Date of Measurement:	2022-11-23 10:29:09		Date of Measurement:	2022-11-23 10:29:50		Date of Measurement:	2022-11-23 10:30:30		Date of Measurement:	2022-11-23 10:31:11		Date of Measurement:	2022-11-23 10:31:51		Date of Measurement:	2022-11-23 10:32:32		Date of Measurement:	2022-11-23 10:33:12		Date of Measurement:	2022-11-23 10:33:53		Date of Measurement:	2022-11-23 10:34:33		Date of Measurement:	2022-11-23 10:35:14		Date of Measurement:	2022-11-23 10:35:54
Capillary Type:	Monolith NT.115 Premium Capillary		Capillary Type:	Monolith NT.115 Premium Capillary		Capillary Type:	Monolith NT.115 Premium Capillary		Capillary Type:	Monolith NT.115 Premium Capillary		Capillary Type:	Monolith NT.115 Premium Capillary		Capillary Type:	Monolith NT.115 Premium Capillary		Capillary Type:	Monolith NT.115 Premium Capillary		Capillary Type:	Monolith NT.115 Premium Capillary		Capillary Type:	Monolith NT.115 Premium Capillary		Capillary Type:	Monolith NT.115 Premium Capillary		Capillary Type:	Monolith NT.115 Premium Capillary		Capillary Type:	Monolith NT.115 Premium Capillary		Capillary Type:	Monolith NT.115 Premium Capillary		Capillary Type:	Monolith NT.115 Premium Capillary		Capillary Type:	Monolith NT.115 Premium Capillary		Capillary Type:	Monolith NT.115 Premium Capillary
Capillary Position:	1		Capillary Position:	2		Capillary Position:	3		Capillary Position:	4		Capillary Position:	5		Capillary Position:	6		Capillary Position:	7		Capillary Position:	8		Capillary Position:	9		Capillary Position:	10		Capillary Position:	11		Capillary Position:	12		Capillary Position:	13		Capillary Position:	14		Capillary Position:	15		Capillary Position:	16
Ligand:	cAMP		Ligand:	cAMP		Ligand:	cAMP		Ligand:	cAMP		Ligand:	cAMP		Ligand:	cAMP		Ligand:	cAMP		Ligand:	cAMP		Ligand:	cAMP		Ligand:	cAMP		Ligand:	cAMP		Ligand:	cAMP		Ligand:	cAMP		Ligand:	cAMP		Ligand:	cAMP		Ligand:	cAMP
Ligand Concentration:	0.0001		Ligand Concentration:	5e-05		Ligand Concentration:	2.5e-05		Ligand Concentration:	1.25e-05		Ligand Concentration:	6.25e-06		Ligand Concentration:	3.125e-06		Ligand Concentration:	1.5625e-06		Ligand Concentration:	7.8125e-07		Ligand Concentration:	3.90625e-07		Ligand Concentration:	1.95313e-07		Ligand Concentration:	9.76563e-08		Ligand Concentration:	4.88281e-08		Ligand Concentration:	2.44141e-08		Ligand Concentration:	1.2207e-08		Ligand Concentration:	6.10352e-09		Ligand Concentration:	3.05176e-09
Target:	CNBD		Target:	CNBD		Target:	CNBD		Target:	CNBD		Target:	CNBD		Target:	CNBD		Target:	CNBD		Target:	CNBD		Target:	CNBD		Target:	CNBD		Target:	CNBD		Target:	CNBD		Target:	CNBD		Target:	CNBD		Target:	CNBD		Target:	CNBD
TargetConcentration:	5e-08		TargetConcentration:	5e-08		TargetConcentration:	5e-08		TargetConcentration:	5e-08		TargetConcentration:	5e-08		TargetConcentration:	5e-08		TargetConcentration:	5e-08		TargetConcentration:	5e-08		TargetConcentration:	5e-08		TargetConcentration:	5e-08		TargetConcentration:	5e-08		TargetConcentration:	5e-08		TargetConcentration:	5e-08		TargetConcentration:	5e-08		TargetConcentration:	5e-08		TargetConcentration:	5e-08
Measurement Settings	Measurement Settings		Measurement Settings	Measurement Settings		Measurement Settings	Measurement Settings		Measurement Settings	Measurement Settings		Measurement Settings	Measurement Settings		Measurement Settings	Measurement Settings		Measurement Settings	Measurement Settings		Measurement Settings	Measurement Settings		Measurement Settings	Measurement Settings		Measurement Settings	Measurement Settings		Measurement Settings	Measurement Settings		Measurement Settings	Measurement Settings		Measurement Settings	Measurement Settings		Measurement Settings	Measurement Settings		Measurement Settings	Measurement Settings		Measurement Settings	Measurement Settings
MST-Power:	Medium		MST-Power:	Medium		MST-Power:	Medium		MST-Power:	Medium		MST-Power:	Medium		MST-Power:	Medium		MST-Power:	Medium		MST-Power:	Medium		MST-Power:	Medium		MST-Power:	Medium		MST-Power:	Medium		MST-Power:	Medium		MST-Power:	Medium		MST-Power:	Medium		MST-Power:	Medium		MST-Power:	Medium
Excitation-Power:	60		Excitation-Power:	60		Excitation-Power:	60		Excitation-Power:	60		Excitation-Power:	60		Excitation-Power:	60		Excitation-Power:	60		Excitation-Power:	60		Excitation-Power:	60		Excitation-Power:	60		Excitation-Power:	60		Excitation-Power:	60		Excitation-Power:	60		Excitation-Power:	60		Excitation-Power:	60		Excitation-Power:	60
Excitation type:	Nano - RED		Excitation type:	Nano - RED		Excitation type:	Nano - RED		Excitation type:	Nano - RED		Excitation type:	Nano - RED		Excitation type:	Nano - RED		Excitation type:	Nano - RED		Excitation type:	Nano - RED		Excitation type:	Nano - RED		Excitation type:	Nano - RED		Excitation type:	Nano - RED		Excitation type:	Nano - RED		Excitation type:	Nano - RED		Excitation type:	Nano - RED		Excitation type:	Nano - RED		Excitation type:	Nano - RED
Thermostat Setpoint:	25		Thermostat Setpoint:	25		Thermostat Setpoint:	25		Thermostat Setpoint:	25		Thermostat Setpoint:	25		Thermostat Setpoint:	25		Thermostat Setpoint:	25		Thermostat Setpoint:	25		Thermostat Setpoint:	25		Thermostat Setpoint:	25		Thermostat Setpoint:	25		Thermostat Setpoint:	25		Thermostat Setpoint:	25		Thermostat Setpoint:	25		Thermostat Setpoint:	25		Thermostat Setpoint:	25
Included	Included		Included	Included		Included	Included		Included	Included		Included	Included		Included	Included		Included	Included		Included	Included		Included	Included		Included	Included		Included	Included		Included	Included		Included	Included		Included	Included		Included	Included		Included	Included
Time [s]	Normalized Fluorescence [-]		Time [s]	Normalized Fluorescence [-]		Time [s]	Normalized Fluorescence [-]		Time [s]	Normalized Fluorescence [-]		Time [s]	Normalized Fluorescence [-]		Time [s]	Normalized Fluorescence [-]		Time [s]	Normalized Fluorescence [-]		Time [s]	Normalized Fluorescence [-]		Time [s]	Normalized Fluorescence [-]		Time [s]	Normalized Fluorescence [-]		Time [s]	Normalized Fluorescence [-]		Time [s]	Normalized Fluorescence [-]		Time [s]	Normalized Fluorescence [-]		Time [s]	Normalized Fluorescence [-]		Time [s]	Normalized Fluorescence [-]		Time [s]	Normalized Fluorescence [-]
-3.57675	0.99946		-3.57675	1.00111		-3.57675	1.00079		-3.57675	1.00008		-3.57675	1.00045		-3.57675	1.00018		-3.57675	1.00099		-3.57675	0.998688		-3.57675	0.999601		-3.57675	0.998972		-3.57675	1.0011		-3.57675	1.00178		-3.57675	0.999332		-3.57675	1.00014		-3.57675	1.00045		-3.57675	0.999582
-3.50223	0.999864		-3.50223	0.999932		-3.50223	0.999401		-3.50223	0.999732		-3.50223	0.999458		-3.50223	1.00058		-3.50223	0.998963		-3.50223	0.999305		-3.50223	1.00044		-3.50223	1		-3.50223	1.00055		-3.50223	1.00099		-3.50223	1.0002		-3.50223	1.00042		-3.50223	1.00154		-3.50223	1.00002
-3.42772	0.999723		-3.42772	0.999133		-3.42772	0.999401		-3.42772	1.0015		-3.42772	1.00048		-3.42772	0.998984		-3.42772	0.999971		-3.42772	1.00023		-3.42772	1.0011		-3.42772	0.9997		-3.42772	0.998566		-3.42772	1.00021		-3.42772	1.0005		-3.42772	0.998767		-3.42772	0.998863		-3.42772	1.00015
-3.3532	1.00085		-3.3532	1.00061		-3.3532	1.00158		-3.3532	0.999859		-3.3532	0.998989		-3.3532	1.00087		-3.3532	1.00031		-3.3532	0.999589		-3.3532	1.00056		-3.3532	1.00035		-3.3532	0.999684		-3.3532	0.999439		-3.3532	1.00025		-3.3532	0.999764		-3.3532	0.998792		-3.3532	0.999997
-3.27869	0.9992		-3.27869	1.0007		-3.27869	0.999247		-3.27869	0.999196		-3.27869	0.999113		-3.27869	1.00066		-3.27869	0.999677		-3.27869	0.998704		-3.27869	0.999296		-3.27869	0.999837		-3.27869	1.00102		-3.27869	0.9999		-3.27869	0.999809		-3.27869	1.00011		-3.27869	1.00088		-3.27869	0.999344
-3.20417	0.999567		-3.20417	1.00045		-3.20417	1.00061		-3.20417	0.999443		-3.20417	0.99865		-3.20417	0.99938		-3.20417	1.00003		-3.20417	1.00144		-3.20417	1.00027		-3.20417	0.99983		-3.20417	0.999972		-3.20417	0.999549		-3.20417	0.999566		-3.20417	0.999309		-3.20417	1.00154		-3.20417	1.00133
-3.12966	1.00005		-3.12966	0.99838		-3.12966	0.999694		-3.12966	0.99919		-3.12966	0.999745		-3.12966	1.00088		-3.12966	0.99963		-3.12966	0.998987		-3.12966	0.999465		-3.12966	0.999659		-3.12966	0.998859		-3.12966	0.999961		-3.12966	0.999543		-3.12966	1.00082		-3.12966	1.00045		-3.12966	0.999308
-3.05514	0.999711		-3.05514	0.999714		-3.05514	0.9997		-3.05514	0.999452		-3.05514	0.999745		-3.05514	0.998678		-3.05514	0.999586		-3.05514	1.00011		-3.05514	1.00043		-3.05514	1.00058		-3.05514	0.998617		-3.05514	0.998853		-3.05514	0.999478		-3.05514	1.00109		-3.05514	1.00081		-3.05514	0.999658
-2.98062	0.998864		-2.98062	1.00036		-2.98062	0.999514		-2.98062	1.00038		-2.98062	0.999683		-2.98062	0.99995		-2.98062	1.00098		-2.98062	1.0002		-2.98062	0.998043		-2.98062	0.998934		-2.98062	0.999814		-2.98062	1.00079		-2.98062	0.999011		-2.98062	0.999722		-2.98062	1.00106		-2.98062	1.00101
-2.90611	0.99983		-2.90611	0.999917		-2.90611	1.00244		-2.90611	0.999829		-2.90611	1.00022		-2.90611	1.00039		-2.90611	0.999323		-2.90611	0.99975		-2.90611	1.00048		-2.90611	0.999255		-2.90611	0.999935		-2.90611	0.999175		-2.90611	1.00074		-2.90611	1.00045		-2.90611	1.00029		-2.90611	0.999064
-2.83159	1.00038		-2.83159	0.999512		-2.83159	1.00006		-2.83159	0.999359		-2.83159	0.999401		-2.83159	1.00044		-2.83159	0.999611		-2.83159	0.999162		-2.83159	1.00034		-2.83159	0.999455		-2.83159	0.999667		-2.83159	0.997649		-2.83159	1.00017		-2.83159	1.00046		-2.83159	0.999565		-2.83159	1.00033
-2.75708	1.00025		-2.75708	0.999064		-2.75708	1.00029		-2.75708	0.99916		-2.75708	0.999994		-2.75708	0.998341		-2.75708	0.999386		-2.75708	1.00033		-2.75708	0.999967		-2.75708	1.00101		-2.75708	1.00042		-2.75708	0.999971		-2.75708	0.999718		-2.75708	0.999474		-2.75708	0.999122		-2.75708	1.0007
-2.68256	1.00048		-2.68256	0.998873		-2.68256	0.998797		-2.68256	1.00002		-2.68256	0.999645		-2.68256	0.999365		-2.68256	0.999786		-2.68256	1.00022		-2.68256	0.999336		-2.68256	0.999261		-2.68256	1.00007		-2.68256	0.999343		-2.68256	1.0002		-2.68256	0.999477		-2.68256	0.998322		-2.68256	0.999799
-2.60805	1.00014		-2.60805	0.999602		-2.60805	0.998794		-2.60805	1.00039		-2.60805	1.00101		-2.60805	0.999614		-2.60805	0.999933		-2.60805	1.00103		-2.60805	0.998292		-2.60805	1.00007		-2.60805	0.999118		-2.60805	1.0006		-2.60805	1.00007		-2.60805	0.999447		-2.60805	0.999333		-2.60805	1.00023
-2.53353	0.999286		-2.53353	1.00008		-2.53353	1.00062		-2.53353	0.999973		-2.53353	0.998894		-2.53353	0.999554		-2.53353	0.999993		-2.53353	1.00087		-2.53353	0.998908		-2.53353	1.00008		-2.53353	0.99967		-2.53353	0.998989		-2.53353	1.0002		-2.53353	0.999084		-2.53353	0.999646		-2.53353	0.998972
-2.45901	1.00038		-2.45901	1.00068		-2.45901	0.999721		-2.45901	0.999817		-2.45901	0.999352		-2.45901	0.998849		-2.45901	1.00024		-2.45901	0.99942		-2.45901	0.999176		-2.45901	0.998495		-2.45901	0.999963		-2.45901	0.999542		-2.45901	0.999312		-2.45901	1.00029		-2.45901	0.999607		-2.45901	1.0003
-2.3845	0.999747		-2.3845	0.998147		-2.3845	0.999053		-2.3845	0.998329		-2.3845	0.998999		-2.3845	0.999182		-2.3845	1.00044		-2.3845	0.999529		-2.3845	0.998905		-2.3845	0.999357		-2.3845	0.99989		-2.3845	1.00019		-2.3845	0.999066		-2.3845	0.999935		-2.3845	0.999512		-2.3845	1.00237
-2.30998	1.0002		-2.30998	0.999972		-2.30998	0.99921		-2.30998	1.00015		-2.30998	0.99991		-2.30998	1.00055		-2.30998	0.998725		-2.30998	1.00006		-2.30998	1.00053		-2.30998	0.999961		-2.30998	0.999487		-2.30998	1.00045		-2.30998	1.0005		-2.30998	0.998953		-2.30998	0.999452		-2.30998	1.00073
-2.23547	0.997968		-2.23547	0.999369		-2.23547	0.999227		-2.23547	0.999907		-2.23547	0.998904		-2.23547	1.00089		-2.23547	1.00007		-2.23547	1.00055		-2.23547	0.99893		-2.23547	0.999993		-2.23547	0.999391		-2.23547	0.998721		-2.23547	1.00014		-2.23547	0.998986		-2.23547	0.998852		-2.23547	0.999975
-2.16095	0.998308		-2.16095	0.999763		-2.16095	0.999035		-2.16095	1.00087		-2.16095	0.999821		-2.16095	0.999671		-2.16095	0.999564		-2.16095	0.999383		-2.16095	0.999801		-2.16095	1.00026		-2.16095	0.999783		-2.16095	1.00073		-2.16095	0.999087		-2.16095	1.00046		-2.16095	1.00067		-2.16095	1.00092
-2.08644	0.998708		-2.08644	0.999702		-2.08644	0.999831		-2.08644	0.998555		-2.08644	0.999444		-2.08644	0.999179		-2.08644	0.998788		-2.08644	1.00079		-2.08644	0.999539		-2.08644	0.999881		-2.08644	0.999532		-2.08644	0.998342		-2.08644	0.998727		-2.08644	1.00043		-2.08644	0.999321		-2.08644	0.999604
-2.01192	1.00031		-2.01192	0.999179		-2.01192	0.999233		-2.01192	0.999645		-2.01192	0.999558		-2.01192	0.99845		-2.01192	0.999761		-2.01192	0.998122		-2.01192	0.999102		-2.01192	0.999614		-2.01192	0.998595		-2.01192	0.999468		-2.01192	1.00083		-2.01192	1.00014		-2.01192	0.999925		-2.01192	0.998616
-1.93741	1.0005		-1.93741	0.998138		-1.93741	0.998757		-1.93741	0.998648		-1.93741	0.999512		-1.93741	0.999227		-1.93741	0.999398		-1.93741	0.999554		-1.93741	0.999647		-1.93741	1.00046		-1.93741	1.00063		-1.93741	0.999948		-1.93741	0.998543		-1.93741	1.00084		-1.93741	1.00198		-1.93741	0.998689
-1.86289	0.999115		-1.86289	0.998737		-1.86289	1.00077		-1.86289	0.998811		-1.86289	1.00063		-1.86289	1.00018		-1.86289	0.999908		-1.86289	0.9999		-1.86289	1.00038		-1.86289	1.00037		-1.86289	0.998327		-1.86289	1.00013		-1.86289	1.00019		-1.86289	0.999584		-1.86289	1.00055		-1.86289	0.999951
-1.78837	0.999108		-1.78837	1.00112		-1.78837	0.99943		-1.78837	0.998796		-1.78837	0.998929		-1.78837	1.00106		-1.78837	0.999962		-1.78837	0.999196		-1.78837	1.00094		-1.78837	1.0005		-1.78837	1.00079		-1.78837	0.998461		-1.78837	0.999923		-1.78837	1.00035		-1.78837	0.999699		-1.78837	1.00048
-1.71386	0.998506		-1.71386	1.00046		-1.71386	1.00026		-1.71386	0.999235		-1.71386	0.999685		-1.71386	1.00005		-1.71386	0.999642		-1.71386	0.998994		-1.71386	0.999182		-1.71386	0.998469		-1.71386	0.999741		-1.71386	1.0001		-1.71386	1.00084		-1.71386	1.0013		-1.71386	0.997594		-1.71386	1.00002
-1.63934	0.999616		-1.63934	0.998649		-1.63934	1.00059		-1.63934	0.999202		-1.63934	1.00087		-1.63934	0.998362		-1.63934	0.999223		-1.63934	0.999364		-1.63934	0.999324		-1.63934	0.998946		-1.63934	0.99869		-1.63934	1.00039		-1.63934	0.999984		-1.63934	0.999234		-1.63934	1.00057		-1.63934	1.00028
-1.56483	1.00028		-1.56483	0.998822		-1.56483	0.999105		-1.56483	0.999374		-1.56483	0.99952		-1.56483	0.999704		-1.56483	0.998766		-1.56483	1.00067		-1.56483	0.999456		-1.56483	0.998902		-1.56483	0.999113		-1.56483	0.999137		-1.56483	0.999072		-1.56483	1.00055		-1.56483	0.999949		-1.56483	1.00028
-1.49031	1.00038		-1.49031	0.999624		-1.49031	0.999935		-1.49031	0.998416		-1.49031	1.00034		-1.49031	0.998089		-1.49031	0.999329		-1.49031	0.998467		-1.49031	1.00013		-1.49031	1.00104		-1.49031	1.00034		-1.49031	1.00132		-1.49031	0.999791		-1.49031	0.998746		-1.49031	0.999113		-1.49031	1.00033
-1.4158	0.999341		-1.4158	0.998622		-1.4158	0.999567		-1.4158	0.998133		-1.4158	1.00078		-1.4158	0.999017		-1.4158	0.999069		-1.4158	0.999797		-1.4158	0.999087		-1.4158	0.998737		-1.4158	0.999946		-1.4158	0.999639		-1.4158	0.999587		-1.4158	0.999102		-1.4158	1.00006		-1.4158	1.00031
-1.34128	1.00095		-1.34128	0.999388		-1.34128	0.999654		-1.34128	0.999567		-1.34128	0.998557		-1.34128	0.999662		-1.34128	0.999135		-1.34128	1.00006		-1.34128	0.997821		-1.34128	0.998638		-1.34128	1.00008		-1.34128	0.999665		-1.34128	1.00004		-1.34128	0.999791		-1.34128	0.999256		-1.34128	0.999469
-1.26677	0.998479		-1.26677	1.00021		-1.26677	0.999857		-1.26677	0.998651		-1.26677	0.999016		-1.26677	0.999011		-1.26677	0.998706		-1.26677	1.0004		-1.26677	0.998905		-1.26677	0.999846		-1.26677	0.999428		-1.26677	0.99894		-1.26677	1.00154		-1.26677	0.999908		-1.26677	0.999842		-1.26677	0.999546
-1.19225	0.999512		-1.19225	0.997793		-1.19225	0.99941		-1.19225	0.997992		-1.19225	0.997581		-1.19225	0.999863		-1.19225	0.999398		-1.19225	1.00046		-1.19225	0.999712		-1.19225	0.998501		-1.19225	0.999912		-1.19225	0.999452		-1.19225	0.998739		-1.19225	0.999704		-1.19225	1.00039		-1.19225	1.00094
-1.11773	0.998497		-1.11773	0.999385		-1.11773	1.00044		-1.11773	0.999458		-1.11773	0.998514		-1.11773	0.999149		-1.11773	0.999508		-1.11773	0.998991		-1.11773	1.00009		-1.11773	1.00027		-1.11773	0.998471		-1.11773	0.999739		-1.11773	0.998862		-1.11773	1.00032		-1.11773	0.998724		-1.11773	0.999579
-1.04322	0.99938		-1.04322	0.999012		-1.04322	0.999137		-1.04322	0.997904		-1.04322	0.999563		-1.04322	0.99938		-1.04322	1.00006		-1.04322	1.00073		-1.04322	0.998262		-1.04322	0.999102		-1.04322	0.9998		-1.04322	0.999346		-1.04322	0.999359		-1.04322	1.00026		-1.04322	0.999547		-1.04322	1.0005
-0.968703	0.9988		-0.968703	0.99953		-0.968703	0.99851		-0.968703	0.998928		-0.968703	0.999531		-0.968703	0.998906		-0.968703	1.00077		-0.968703	0.99909		-0.968703	0.999955		-0.968703	0.999239		-0.968703	0.999273		-0.968703	0.998866		-0.968703	0.999791		-0.968703	0.998587		-0.968703	0.999095		-0.968703	0.999335
-0.894187	0.998418		-0.894187	0.999554		-0.894187	0.999973		-0.894187	0.999139		-0.894187	0.999051		-0.894187	0.999767		-0.894187	0.999536		-0.894187	0.997651		-0.894187	0.998927		-0.894187	0.999999		-0.894187	1.00029		-0.894187	0.999088		-0.894187	0.999572		-0.894187	0.999405		-0.894187	0.999544		-0.894187	0.999503
-0.819672	0.998916		-0.819672	1.00058		-0.819672	1.0005		-0.819672	0.99863		-0.819672	0.999485		-0.819672	0.999095		-0.819672	0.999339		-0.819672	0.998692		-0.819672	0.999127		-0.819672	0.999191		-0.819672	0.999341		-0.819672	0.998696		-0.819672	0.998718		-0.819672	0.999384		-0.819672	1.00119		-0.819672	1.00023
-0.745156	0.999255		-0.745156	0.998873		-0.745156	0.999433		-0.745156	0.998853		-0.745156	0.998479		-0.745156	0.998558		-0.745156	1.0002		-0.745156	0.99961		-0.745156	0.999096		-0.745156	0.999159		-0.745156	0.998848		-0.745156	0.999855		-0.745156	0.999858		-0.745156	0.998749		-0.745156	1.00045		-0.745156	0.999759
-0.67064	0.998739		-0.67064	0.999826		-0.67064	0.998757		-0.67064	0.997962		-0.67064	0.999094		-0.67064	0.999068		-0.67064	0.998647		-0.67064	0.999657		-0.67064	0.998982		-0.67064	0.99777		-0.67064	0.998744		-0.67064	1.00053		-0.67064	1.00041		-0.67064	0.99977		-0.67064	0.999384		-0.67064	1.00217
-0.596125	0.99986		-0.596125	0.999148		-0.596125	0.998852		-0.596125	0.999612		-0.596125	0.999403		-0.596125	0.999149		-0.596125	0.999727		-0.596125	0.999685		-0.596125	0.998776		-0.596125	0.999303		-0.596125	0.999397		-0.596125	0.998226		-0.596125	0.998701		-0.596125	1.00121		-0.596125	0.999771		-0.596125	1.00084
-0.521609	0.99839		-0.521609	0.99881		-0.521609	1.00085		-0.521609	1.00053		-0.521609	0.998097		-0.521609	0.99992		-0.521609	0.999827		-0.521609	0.997972		-0.521609	0.998345		-0.521609	0.998396		-0.521609	1.00033		-0.521609	0.998795		-0.521609	0.999657		-0.521609	1.00004		-0.521609	1.00077		-0.521609	1.00019
-0.447094	0.999454		-0.447094	0.998468		-0.447094	1.00082		-0.447094	0.999031		-0.447094	0.999097		-0.447094	0.999923		-0.447094	0.999552		-0.447094	0.999757		-0.447094	0.997356		-0.447094	0.998317		-0.447094	0.999918		-0.447094	0.997417		-0.447094	0.999604		-0.447094	0.998476		-0.447094	0.999655		-0.447094	1.00126
-0.372578	0.998494		-0.372578	0.99913		-0.372578	0.999982		-0.372578	0.999148		-0.372578	0.999639		-0.372578	0.998921		-0.372578	1.0002		-0.372578	0.999346		-0.372578	0.999084		-0.372578	0.998272		-0.372578	0.99869		-0.372578	0.999497		-0.372578	0.999783		-0.372578	1.00003		-0.372578	1.00123		-0.372578	1.00057
-0.298063	0.9981		-0.298063	0.999227		-0.298063	0.999302		-0.298063	0.996971		-0.298063	0.999279		-0.298063	1.00009		-0.298063	0.999567		-0.298063	0.999567		-0.298063	1.00012		-0.298063	0.999627		-0.298063	0.99855		-0.298063	0.999565		-0.298063	0.999414		-0.298063	0.999707		-0.298063	0.998079		-0.298063	0.999658
-0.223547	0.999426		-0.223547	0.999984		-0.223547	1.00045		-0.223547	0.999317		-0.223547	0.998083		-0.223547	0.999602		-0.223547	0.998453		-0.223547	0.998268		-0.223547	1.00002		-0.223547	0.999776		-0.223547	0.999251		-0.223547	1.00038		-0.223547	1.00011		-0.223547	1.00011		-0.223547	1.00004		-0.223547	1.00076
-0.149031	0.997886		-0.149031	0.998525		-0.149031	1.00035		-0.149031	0.99876		-0.149031	0.99881		-0.149031	0.999035		-0.149031	0.999273		-0.149031	0.999648		-0.149031	0.9988		-0.149031	0.999306		-0.149031	0.999786		-0.149031	1.00038		-0.149031	0.998192		-0.149031	0.999474		-0.149031	1.00183		-0.149031	1.00022
-0.0745156	0.999099		-0.0745156	0.998589		-0.0745156	0.998582		-0.0745156	0.99866		-0.0745156	0.997953		-0.0745156	1.00021		-0.0745156	0.999373		-0.0745156	0.99971		-0.0745156	0.999869		-0.0745156	0.999379		-0.0745156	0.998161		-0.0745156	0.999288		-0.0745156	0.998803		-0.0745156	1.00023		-0.0745156	1.00034		-0.0745156	0.998921
0	0.999417		0	0.998089		0	0.998591		0	0.998163		0	0.996912		0	0.997096		0	0.997301		0	0.997978		0	0.997766		0	0.9981		0	0.998048		0	0.999111		0	0.999385		0	0.999462		0	0.999063		0	0.999957
0.0745156	0.98183		0.0745156	0.980794		0.0745156	0.980874		0.0745156	0.980247		0.0745156	0.98084		0.0745156	0.980567		0.0745156	0.980346		0.0745156	0.979924		0.0745156	0.980708		0.0745156	0.980213		0.0745156	0.981542		0.0745156	0.981326		0.0745156	0.97933		0.0745156	0.981096		0.0745156	0.98087		0.0745156	0.979673
0.149031	0.971376		0.149031	0.96943		0.149031	0.970473		0.149031	0.970271		0.149031	0.969979		0.149031	0.969795		0.149031	0.971443		0.149031	0.971481		0.149031	0.9691		0.149031	0.968799		0.149031	0.97176		0.149031	0.970198		0.149031	0.970025		0.149031	0.97054		0.149031	0.970945		0.149031	0.970592
0.223547	0.96393		0.223547	0.961737		0.223547	0.963653		0.223547	0.962659		0.223547	0.963428		0.223547	0.96287		0.223547	0.96325		0.223547	0.962568		0.223547	0.962822		0.223547	0.96243		0.223547	0.964188		0.223547	0.965671		0.223547	0.964128		0.223547	0.962134		0.223547	0.963808		0.223547	0.96405
0.298062	0.959024		0.298062	0.958817		0.298062	0.959001		0.298062	0.958253		0.298062	0.957965		0.298062	0.95917		0.298062	0.957537		0.298062	0.958345		0.298062	0.957406		0.298062	0.957612		0.298062	0.958441		0.298062	0.958443		0.298062	0.95817		0.298062	0.958005		0.298062	0.957819		0.298062	0.957228
0.372578	0.953947		0.372578	0.955086		0.372578	0.953966		0.372578	0.953372		0.372578	0.955712		0.372578	0.954391		0.372578	0.952397		0.372578	0.954109		0.372578	0.952095		0.372578	0.951735		0.372578	0.954029		0.372578	0.953237		0.372578	0.953174		0.372578	0.954909		0.372578	0.954126		0.372578	0.954176
0.447093	0.949253		0.447093	0.950247		0.447093	0.950825		0.447093	0.948669		0.447093	0.950043		0.447093	0.950507		0.447093	0.948988		0.447093	0.949852		0.447093	0.948499		0.447093	0.949805		0.447093	0.949831		0.447093	0.949557		0.447093	0.949526		0.447093	0.950626		0.447093	0.949707		0.447093	0.951125
0.521609	0.946431		0.521609	0.946588		0.521609	0.946772		0.521609	0.946805		0.521609	0.946589		0.521609	0.946389		0.521609	0.946101		0.521609	0.944816		0.521609	0.945688		0.521609	0.9445		0.521609	0.945869		0.521609	0.945027		0.521609	0.945371		0.521609	0.94526		0.521609	0.9455		0.521609	0.945796
0.596125	0.9421		0.596125	0.94302		0.596125	0.943003		0.596125	0.942643		0.596125	0.942476		0.596125	0.944904		0.596125	0.942207		0.596125	0.943134		0.596125	0.941981		0.596125	0.941711		0.596125	0.942357		0.596125	0.942274		0.596125	0.944003		0.596125	0.944008		0.596125	0.943121		0.596125	0.942025
0.67064	0.941541		0.67064	0.941386		0.67064	0.941194		0.67064	0.939777		0.67064	0.941042		0.67064	0.941575		0.67064	0.939609		0.67064	0.939858		0.67064	0.939459		0.67064	0.938382		0.67064	0.940147		0.67064	0.938951		0.67064	0.939232		0.67064	0.940256		0.67064	0.939749		0.67064	0.940141
0.745156	0.939224		0.745156	0.939222		0.745156	0.939051		0.745156	0.938148		0.745156	0.9382		0.745156	0.937709		0.745156	0.936353		0.745156	0.935482		0.745156	0.935813		0.745156	0.935412		0.745156	0.937314		0.745156	0.93737		0.745156	0.937197		0.745156	0.937175		0.745156	0.937804		0.745156	0.938654
0.819672	0.936063		0.819672	0.935136		0.819672	0.935692		0.819672	0.933845		0.819672	0.937108		0.819672	0.93598		0.819672	0.933761		0.819672	0.934438		0.819672	0.933224		0.819672	0.932941		0.819672	0.933671		0.819672	0.933629		0.819672	0.936203		0.819672	0.93524		0.819672	0.934191		0.819672	0.935075
0.894187	0.933016		0.894187	0.933187		0.894187	0.933764		0.894187	0.933062		0.894187	0.93354		0.894187	0.933288		0.894187	0.932393		0.894187	0.931586		0.894187	0.930391		0.894187	0.931138		0.894187	0.932471		0.894187	0.933272		0.894187	0.932002		0.894187	0.933863		0.894187	0.93362		0.894187	0.930688
0.968703	0.92959		0.968703	0.928896		0.968703	0.931304		0.968703	0.931171		0.968703	0.931406		0.968703	0.93155		0.968703	0.929463		0.968703	0.9283		0.968703	0.928615		0.968703	0.928285		0.968703	0.930593		0.968703	0.92944		0.968703	0.929298		0.968703	0.930117		0.968703	0.93136		0.968703	0.930609
1.04322	0.929073		1.04322	0.928784		1.04322	0.929002		1.04322	0.927446		1.04322	0.928787		1.04322	0.928204		1.04322	0.927303		1.04322	0.926509		1.04322	0.926927		1.04322	0.927388		1.04322	0.92874		1.04322	0.929012		1.04322	0.927009		1.04322	0.928455		1.04322	0.929017		1.04322	0.927012
1.11773	0.927548		1.11773	0.926493		1.11773	0.926595		1.11773	0.925669		1.11773	0.9268		1.11773	0.925097		1.11773	0.925963		1.11773	0.923469		1.11773	0.923787		1.11773	0.922224		1.11773	0.926246		1.11773	0.925915		1.11773	0.92605		1.11773	0.924735		1.11773	0.926507		1.11773	0.925997
1.19225	0.926233		1.19225	0.92491		1.19225	0.926098		1.19225	0.923089		1.19225	0.926022		1.19225	0.926508		1.19225	0.921555		1.19225	0.922221		1.19225	0.920289		1.19225	0.92285		1.19225	0.922408		1.19225	0.923751		1.19225	0.92358		1.19225	0.923538		1.19225	0.925029		1.19225	0.923381
1.26677	0.923461		1.26677	0.922483		1.26677	0.922225		1.26677	0.922688		1.26677	0.924387		1.26677	0.921135		1.26677	0.919717		1.26677	0.919464		1.26677	0.91988		1.26677	0.9203		1.26677	0.921951		1.26677	0.921314		1.26677	0.921832		1.26677	0.922073		1.26677	0.920628		1.26677	0.920482
1.34128	0.92171		1.34128	0.921445		1.34128	0.921833		1.34128	0.921255		1.34128	0.921196		1.34128	0.92151		1.34128	0.918271		1.34128	0.916294		1.34128	0.918045		1.34128	0.919731		1.34128	0.920307		1.34128	0.92002		1.34128	0.919841		1.34128	0.91972		1.34128	0.920263		1.34128	0.921168
1.4158	0.920545		1.4158	0.918737		1.4158	0.918415		1.4158	0.919283		1.4158	0.918522		1.4158	0.919379		1.4158	0.916602		1.4158	0.91602		1.4158	0.913989		1.4158	0.916996		1.4158	0.917747		1.4158	0.917299		1.4158	0.918189		1.4158	0.918854		1.4158	0.918696		1.4158	0.917815
1.49031	0.918253		1.49031	0.915904		1.49031	0.917951		1.49031	0.916982		1.49031	0.918246		1.49031	0.918206		1.49031	0.9154		1.49031	0.913908		1.49031	0.913146		1.49031	0.915065		1.49031	0.91815		1.49031	0.916011		1.49031	0.917733		1.49031	0.917369		1.49031	0.916971		1.49031	0.918156
1.56483	0.915306		1.56483	0.915017		1.56483	0.915721		1.56483	0.915736		1.56483	0.916006		1.56483	0.916486		1.56483	0.915404		1.56483	0.913531		1.56483	0.912933		1.56483	0.912022		1.56483	0.914737		1.56483	0.914604		1.56483	0.91364		1.56483	0.914704		1.56483	0.915178		1.56483	0.914574
1.63934	0.915398		1.63934	0.913438		1.63934	0.915965		1.63934	0.914902		1.63934	0.915334		1.63934	0.9141		1.63934	0.912608		1.63934	0.911317		1.63934	0.910649		1.63934	0.911357		1.63934	0.914312		1.63934	0.912408		1.63934	0.91288		1.63934	0.911991		1.63934	0.913956		1.63934	0.913669
1.71386	0.913402		1.71386	0.914179		1.71386	0.913102		1.71386	0.911978		1.71386	0.912628		1.71386	0.911984		1.71386	0.909111		1.71386	0.908754		1.71386	0.909109		1.71386	0.910531		1.71386	0.91251		1.71386	0.91114		1.71386	0.912149		1.71386	0.91161		1.71386	0.911514		1.71386	0.911648
1.78837	0.910107		1.78837	0.910684		1.78837	0.911308		1.78837	0.910316		1.78837	0.911107		1.78837	0.910822		1.78837	0.908745		1.78837	0.9082		1.78837	0.906172		1.78837	0.907242		1.78837	0.910012		1.78837	0.911114		1.78837	0.909694		1.78837	0.910071		1.78837	0.91056		1.78837	0.910944
1.86289	0.910837		1.86289	0.910227		1.86289	0.911177		1.86289	0.909728		1.86289	0.91057		1.86289	0.90912		1.86289	0.907565		1.86289	0.906399		1.86289	0.905759		1.86289	0.906476		1.86289	0.909559		1.86289	0.909858		1.86289	0.908059		1.86289	0.909227		1.86289	0.909373		1.86289	0.907941
1.93741	0.909838		1.93741	0.908081		1.93741	0.909586		1.93741	0.907446		1.93741	0.90858		1.93741	0.907857		1.93741	0.905455		1.93741	0.903961		1.93741	0.904605		1.93741	0.905738		1.93741	0.907957		1.93741	0.906491		1.93741	0.907612		1.93741	0.907041		1.93741	0.908264		1.93741	0.907569
2.01192	0.907686		2.01192	0.905808		2.01192	0.907806		2.01192	0.906657		2.01192	0.907192		2.01192	0.906545		2.01192	0.903902		2.01192	0.903447		2.01192	0.902717		2.01192	0.905665		2.01192	0.905907		2.01192	0.90651		2.01192	0.90549		2.01192	0.906052		2.01192	0.905532		2.01192	0.90581
2.08644	0.907023		2.08644	0.905469		2.08644	0.906819		2.08644	0.906175		2.08644	0.906525		2.08644	0.905609		2.08644	0.902738		2.08644	0.900171		2.08644	0.900319		2.08644	0.903929		2.08644	0.904029		2.08644	0.903448		2.08644	0.905256		2.08644	0.903501		2.08644	0.904369		2.08644	0.904161
2.16095	0.904397		2.16095	0.903711		2.16095	0.904856		2.16095	0.903899		2.16095	0.904532		2.16095	0.904471		2.16095	0.900587		2.16095	0.900136		2.16095	0.900322		2.16095	0.901467		2.16095	0.904828		2.16095	0.902418		2.16095	0.904841		2.16095	0.903678		2.16095	0.903831		2.16095	0.903341
2.23547	0.904232		2.23547	0.903239		2.23547	0.903909		2.23547	0.903525		2.23547	0.903364		2.23547	0.902445		2.23547	0.899231		2.23547	0.899174		2.23547	0.898804		2.23547	0.900338		2.23547	0.90321		2.23547	0.90123		2.23547	0.902183		2.23547	0.902743		2.23547	0.903043		2.23547	0.901341
2.30998	0.903003		2.30998	0.901762		2.30998	0.902295		2.30998	0.900035		2.30998	0.902955		2.30998	0.901359		2.30998	0.898386		2.30998	0.89757		2.30998	0.897548		2.30998	0.898306		2.30998	0.902277		2.30998	0.900486		2.30998	0.899731		2.30998	0.900288		2.30998	0.901125		2.30998	0.899527
2.3845	0.900769		2.3845	0.901811		2.3845	0.901946		2.3845	0.900364		2.3845	0.899641		2.3845	0.899585		2.3845	0.898035		2.3845	0.89573		2.3845	0.895903		2.3845	0.897012		2.3845	0.899445		2.3845	0.898728		2.3845	0.89962		2.3845	0.899551		2.3845	0.899912		2.3845	0.899713
2.45901	0.89991		2.45901	0.899014		2.45901	0.90057		2.45901	0.89912		2.45901	0.89895		2.45901	0.899426		2.45901	0.896542		2.45901	0.894014		2.45901	0.896224		2.45901	0.896468		2.45901	0.900965		2.45901	0.897875		2.45901	0.897903		2.45901	0.899105		2.45901	0.898609		2.45901	0.897573
2.53353	0.8984		2.53353	0.898557		2.53353	0.89848		2.53353	0.898162		2.53353	0.900127		2.53353	0.897988		2.53353	0.896029		2.53353	0.893518		2.53353	0.894084		2.53353	0.89532		2.53353	0.898701		2.53353	0.897958		2.53353	0.896369		2.53353	0.896859		2.53353	0.89766		2.53353	0.896269
2.60805	0.898944		2.60805	0.89758		2.60805	0.897315		2.60805	0.896365		2.60805	0.898359		2.60805	0.895104		2.60805	0.894817		2.60805	0.892425		2.60805	0.893031		2.60805	0.893027		2.60805	0.89677		2.60805	0.894922		2.60805	0.895378		2.60805	0.895065		2.60805	0.896067		2.60805	0.895092
2.68256	0.897165		2.68256	0.896742		2.68256	0.897278		2.68256	0.896585		2.68256	0.896534		2.68256	0.896019		2.68256	0.892388		2.68256	0.890155		2.68256	0.891895		2.68256	0.892741		2.68256	0.895503		2.68256	0.89394		2.68256	0.894977		2.68256	0.893397		2.68256	0.895754		2.68256	0.893696
2.75708	0.897049		2.75708	0.895122		2.75708	0.896351		2.75708	0.895401		2.75708	0.895461		2.75708	0.895272		2.75708	0.892185		2.75708	0.889385		2.75708	0.890143		2.75708	0.891418		2.75708	0.894568		2.75708	0.894243		2.75708	0.893764		2.75708	0.893688		2.75708	0.894871		2.75708	0.894104
2.83159	0.895264		2.83159	0.89429		2.83159	0.895623		2.83159	0.894591		2.83159	0.894685		2.83159	0.893621		2.83159	0.891108		2.83159	0.889002		2.83159	0.88856		2.83159	0.890515		2.83159	0.894576		2.83159	0.893663		2.83159	0.892679		2.83159	0.893086		2.83159	0.891526		2.83159	0.893494
2.90611	0.893299		2.90611	0.8937		2.90611	0.893689		2.90611	0.893477		2.90611	0.893457		2.90611	0.89263		2.90611	0.888697		2.90611	0.887523		2.90611	0.887772		2.90611	0.890833		2.90611	0.892816		2.90611	0.891297		2.90611	0.89144		2.90611	0.89208		2.90611	0.891523		2.90611	0.891995
2.98062	0.892911		2.98062	0.892992		2.98062	0.892629		2.98062	0.890153		2.98062	0.891315		2.98062	0.891448		2.98062	0.889195		2.98062	0.886947		2.98062	0.887082		2.98062	0.889148		2.98062	0.891949		2.98062	0.890344		2.98062	0.890148		2.98062	0.890061		2.98062	0.890586		2.98062	0.889519
3.05514	0.892281		3.05514	0.892381		3.05514	0.891694		3.05514	0.89027		3.05514	0.892299		3.05514	0.890016		3.05514	0.887213		3.05514	0.886137		3.05514	0.886285		3.05514	0.887367		3.05514	0.891279		3.05514	0.888647		3.05514	0.889472		3.05514	0.88863		3.05514	0.889614		3.05514	0.889544
3.12966	0.890322		3.12966	0.888988		3.12966	0.889148		3.12966	0.889066		3.12966	0.890865		3.12966	0.890217		3.12966	0.88593		3.12966	0.883593		3.12966	0.885352		3.12966	0.887332		3.12966	0.890643		3.12966	0.887752		3.12966	0.888133		3.12966	0.889298		3.12966	0.889647		3.12966	0.887129
3.20417	0.889484		3.20417	0.890099		3.20417	0.889519		3.20417	0.887765		3.20417	0.888967		3.20417	0.888548		3.20417	0.88634		3.20417	0.884371		3.20417	0.884459		3.20417	0.886028		3.20417	0.888987		3.20417	0.886149		3.20417	0.887332		3.20417	0.887657		3.20417	0.886964		3.20417	0.887011
3.27869	0.890444		3.27869	0.888138		3.27869	0.889807		3.27869	0.889108		3.27869	0.887894		3.27869	0.88862		3.27869	0.884772		3.27869	0.882637		3.27869	0.882153		3.27869	0.88489		3.27869	0.888905		3.27869	0.885888		3.27869	0.885347		3.27869	0.886492		3.27869	0.887654		3.27869	0.887084
3.3532	0.88802		3.3532	0.886752		3.3532	0.886627		3.3532	0.887316		3.3532	0.887173		3.3532	0.885166		3.3532	0.883141		3.3532	0.88283		3.3532	0.881965		3.3532	0.882794		3.3532	0.888714		3.3532	0.88385		3.3532	0.884745		3.3532	0.886926		3.3532	0.88728		3.3532	0.885572
3.42772	0.886348		3.42772	0.886174		3.42772	0.887034		3.42772	0.885419		3.42772	0.887883		3.42772	0.885268		3.42772	0.881913		3.42772	0.880158		3.42772	0.882011		3.42772	0.883166		3.42772	0.886199		3.42772	0.884114		3.42772	0.884429		3.42772	0.884656		3.42772	0.885498		3.42772	0.884703
3.50223	0.887124		3.50223	0.8848		3.50223	0.886764		3.50223	0.885329		3.50223	0.886047		3.50223	0.885478		3.50223	0.882658		3.50223	0.882437		3.50223	0.880278		3.50223	0.882104		3.50223	0.885732		3.50223	0.883335		3.50223	0.885362		3.50223	0.883845		3.50223	0.88419		3.50223	0.883676
3.57675	0.885058		3.57675	0.884058		3.57675	0.88591		3.57675	0.885281		3.57675	0.885858		3.57675	0.884271		3.57675	0.878573		3.57675	0.879432		3.57675	0.879249		3.57675	0.881732		3.57675	0.885349		3.57675	0.882233		3.57675	0.880632		3.57675	0.882889		3.57675	0.88312		3.57675	0.884441
3.65126	0.885306		3.65126	0.883798		3.65126	0.884508		3.65126	0.883176		3.65126	0.884892		3.65126	0.88239		3.65126	0.878542		3.65126	0.879905		3.65126	0.877605		3.65126	0.880507		3.65126	0.883893		3.65126	0.881725		3.65126	0.882438		3.65126	0.882725		3.65126	0.882778		3.65126	0.883124
3.72578	0.882766		3.72578	0.882784		3.72578	0.884705		3.72578	0.882577		3.72578	0.883973		3.72578	0.881822		3.72578	0.879872		3.72578	0.877666		3.72578	0.878239		3.72578	0.880314		3.72578	0.883265		3.72578	0.880508		3.72578	0.881862		3.72578	0.881323		3.72578	0.881906		3.72578	0.881828
3.8003	0.882787		3.8003	0.881204		3.8003	0.882583		3.8003	0.881577		3.8003	0.882818		3.8003	0.88127		3.8003	0.878254		3.8003	0.877819		3.8003	0.875056		3.8003	0.877133		3.8003	0.882753		3.8003	0.87912		3.8003	0.881202		3.8003	0.881027		3.8003	0.881026		3.8003	0.881301
3.87481	0.881641		3.87481	0.881522		3.87481	0.881941		3.87481	0.880487		3.87481	0.881677		3.87481	0.881264		3.87481	0.876031		3.87481	0.874474		3.87481	0.876115		3.87481	0.878084		3.87481	0.8813		3.87481	0.878338		3.87481	0.880845		3.87481	0.879002		3.87481	0.880206		3.87481	0.879883
3.94933	0.880959		3.94933	0.879743		3.94933	0.882269		3.94933	0.880231		3.94933	0.881802		3.94933	0.879358		3.94933	0.875746		3.94933	0.875025		3.94933	0.875222		3.94933	0.877032		3.94933	0.880824		3.94933	0.876638		3.94933	0.879363		3.94933	0.879164		3.94933	0.878829		3.94933	0.880109
4.02384	0.881305		4.02384	0.879943		4.02384	0.880173		4.02384	0.879776		4.02384	0.880986		4.02384	0.880222		4.02384	0.875668		4.02384	0.87406		4.02384	0.87415		4.02384	0.877086		4.02384	0.880354		4.02384	0.876612		4.02384	0.87758		4.02384	0.878395		4.02384	0.878552		4.02384	0.879624
4.09836	0.880972		4.09836	0.877652		4.09836	0.879052		4.09836	0.878379		4.09836	0.880012		4.09836	0.878037		4.09836	0.874986		4.09836	0.873234		4.09836	0.873479		4.09836	0.87574		4.09836	0.879723		4.09836	0.876197		4.09836	0.876846		4.09836	0.877385		4.09836	0.876236		4.09836	0.878344
4.17287	0.878682		4.17287	0.878938		4.17287	0.879299		4.17287	0.877437		4.17287	0.878738		4.17287	0.876456		4.17287	0.872916		4.17287	0.87343		4.17287	0.871829		4.17287	0.874564		4.17287	0.879393		4.17287	0.87488		4.17287	0.876217		4.17287	0.875816		4.17287	0.877687		4.17287	0.876088
4.24739	0.878991		4.24739	0.877748		4.24739	0.87895		4.24739	0.876792		4.24739	0.877157		4.24739	0.877608		4.24739	0.871523		4.24739	0.870917		4.24739	0.870973		4.24739	0.873158		4.24739	0.877222		4.24739	0.875176		4.24739	0.876118		4.24739	0.875972		4.24739	0.876364		4.24739	0.875881
4.3219	0.877123		4.3219	0.877322		4.3219	0.876517		4.3219	0.876952		4.3219	0.87732		4.3219	0.875696		4.3219	0.870716		4.3219	0.870677		4.3219	0.87073		4.3219	0.873724		4.3219	0.876116		4.3219	0.874516		4.3219	0.874612		4.3219	0.874996		4.3219	0.875727		4.3219	0.87607
4.39642	0.876546		4.39642	0.875119		4.39642	0.877269		4.39642	0.876596		4.39642	0.876748		4.39642	0.874745		4.39642	0.872059		4.39642	0.86964		4.39642	0.870172		4.39642	0.872401		4.39642	0.877484		4.39642	0.873073		4.39642	0.87527		4.39642	0.874259		4.39642	0.874871		4.39642	0.874189
4.47094	0.876646		4.47094	0.874898		4.47094	0.877173		4.47094	0.873974		4.47094	0.875015		4.47094	0.873874		4.47094	0.87111		4.47094	0.869762		4.47094	0.868525		4.47094	0.872335		4.47094	0.874956		4.47094	0.873257		4.47094	0.874495		4.47094	0.872971		4.47094	0.874428		4.47094	0.874683
4.54545	0.874975		4.54545	0.874014		4.54545	0.875757		4.54545	0.87429		4.54545	0.875411		4.54545	0.873856		4.54545	0.869855		4.54545	0.869438		4.54545	0.868236		4.54545	0.871683		4.54545	0.873872		4.54545	0.871187		4.54545	0.873241		4.54545	0.872729		4.54545	0.874169		4.54545	0.872607
4.61997	0.874547		4.61997	0.874374		4.61997	0.874766		4.61997	0.873314		4.61997	0.875522		4.61997	0.872197		4.61997	0.869216		4.61997	0.867435		4.61997	0.869024		4.61997	0.868608		4.61997	0.874767		4.61997	0.871351		4.61997	0.871195		4.61997	0.87192		4.61997	0.873568		4.61997	0.872436
4.69448	0.874669		4.69448	0.873826		4.69448	0.87411		4.69448	0.87441		4.69448	0.87437		4.69448	0.870627		4.69448	0.868459		4.69448	0.866423		4.69448	0.868223		4.69448	0.869778		4.69448	0.873421		4.69448	0.870131		4.69448	0.871996		4.69448	0.870839		4.69448	0.872531		4.69448	0.870939
4.769	0.874663		4.769	0.871666		4.769	0.873486		4.769	0.872902		4.769	0.873256		4.769	0.871764		4.769	0.86874		4.769	0.86628		4.769	0.866705		4.769	0.868633		4.769	0.873201		4.769	0.869931		4.769	0.87085		4.769	0.871486		4.769	0.871427		4.769	0.869616
4.84351	0.873975		4.84351	0.872168		4.84351	0.873228		4.84351	0.873239		4.84351	0.872955		4.84351	0.871146		4.84351	0.866026		4.84351	0.865691		4.84351	0.86499		4.84351	0.868045		4.84351	0.870929		4.84351	0.869709		4.84351	0.870511		4.84351	0.869079		4.84351	0.870735		4.84351	0.869863
4.91803	0.872074		4.91803	0.871318		4.91803	0.871628		4.91803	0.87043		4.91803	0.871824		4.91803	0.868742		4.91803	0.865663		4.91803	0.863181		4.91803	0.866521		4.91803	0.867743		4.91803	0.872177		4.91803	0.867085		4.91803	0.868116		4.91803	0.869294		4.91803	0.870696		4.91803	0.871049
4.99255	0.871517		4.99255	0.869199		4.99255	0.872049		4.99255	0.870767		4.99255	0.871098		4.99255	0.869504		4.99255	0.866076		4.99255	0.86377		4.99255	0.864627		4.99255	0.866868		4.99255	0.871005		4.99255	0.868051		4.99255	0.870034		4.99255	0.86968		4.99255	0.870797		4.99255	0.868199
5.06706	0.870888		5.06706	0.870942		5.06706	0.870321		5.06706	0.870469		5.06706	0.871019		5.06706	0.868766		5.06706	0.866092		5.06706	0.863505		5.06706	0.863583		5.06706	0.866703		5.06706	0.870504		5.06706	0.867336		5.06706	0.869067		5.06706	0.867746		5.06706	0.870336		5.06706	0.866946
5.14158	0.871239		5.14158	0.869054		5.14158	0.869029		5.14158	0.870065		5.14158	0.870821		5.14158	0.86858		5.14158	0.865106		5.14158	0.862636		5.14158	0.862466		5.14158	0.865224		5.14158	0.869915		5.14158	0.866212		5.14158	0.867926		5.14158	0.868096		5.14158	0.86909		5.14158	0.867882
5.21609	0.870839		5.21609	0.869275		5.21609	0.870658		5.21609	0.867849		5.21609	0.869813		5.21609	0.867965		5.21609	0.864739		5.21609	0.861633		5.21609	0.862626		5.21609	0.865097		5.21609	0.868541		5.21609	0.865713		5.21609	0.866585		5.21609	0.867605		5.21609	0.868302		5.21609	0.867144
5.29061	0.86788		5.29061	0.86784		5.29061	0.869009		5.29061	0.867494		5.29061	0.869354		5.29061	0.8684		5.29061	0.863468		5.29061	0.86182		5.29061	0.862321		5.29061	0.863955		5.29061	0.868789		5.29061	0.864635		5.29061	0.865865		5.29061	0.866461		5.29061	0.867719		5.29061	0.866937
5.36512	0.869039		5.36512	0.86866		5.36512	0.867865		5.36512	0.869198		5.36512	0.868528		5.36512	0.866596		5.36512	0.862038		5.36512	0.861094		5.36512	0.861308		5.36512	0.863726		5.36512	0.868789		5.36512	0.863801		5.36512	0.86552		5.36512	0.866416		5.36512	0.866444		5.36512	0.865788
5.43964	0.868516		5.43964	0.867326		5.43964	0.867499		5.43964	0.866383		5.43964	0.867286		5.43964	0.865563		5.43964	0.861944		5.43964	0.860593		5.43964	0.861		5.43964	0.862642		5.43964	0.867967		5.43964	0.863347		5.43964	0.864699		5.43964	0.86665		5.43964	0.866417		5.43964	0.8653
5.51415	0.865915		5.51415	0.865677		5.51415	0.867394		5.51415	0.86525		5.51415	0.865065		5.51415	0.865912		5.51415	0.860379		5.51415	0.859777		5.51415	0.859713		5.51415	0.862088		5.51415	0.866905		5.51415	0.861801		5.51415	0.864988		5.51415	0.864566		5.51415	0.866637		5.51415	0.86516
5.58867	0.868488		5.58867	0.865316		5.58867	0.867185		5.58867	0.866807		5.58867	0.865816		5.58867	0.863934		5.58867	0.860783		5.58867	0.858762		5.58867	0.859682		5.58867	0.861904		5.58867	0.866362		5.58867	0.862925		5.58867	0.863904		5.58867	0.863727		5.58867	0.865486		5.58867	0.863425
5.66319	0.866658		5.66319	0.865897		5.66319	0.866709		5.66319	0.864386		5.66319	0.865765		5.66319	0.864372		5.66319	0.860814		5.66319	0.857042		5.66319	0.85821		5.66319	0.861573		5.66319	0.865272		5.66319	0.86203		5.66319	0.864146		5.66319	0.865617		5.66319	0.865894		5.66319	0.863382
5.7377	0.867205		5.7377	0.864935		5.7377	0.866224		5.7377	0.864103		5.7377	0.866052		5.7377	0.864897		5.7377	0.86025		5.7377	0.858024		5.7377	0.857425		5.7377	0.861112		5.7377	0.865734		5.7377	0.861846		5.7377	0.864117		5.7377	0.864012		5.7377	0.863631		5.7377	0.864458
5.81222	0.866798		5.81222	0.863162		5.81222	0.865806		5.81222	0.86482		5.81222	0.865401		5.81222	0.863904		5.81222	0.858582		5.81222	0.857021		5.81222	0.857487		5.81222	0.860581		5.81222	0.86496		5.81222	0.86081		5.81222	0.86243		5.81222	0.861862		5.81222	0.862956		5.81222	0.862453
5.88673	0.865878		5.88673	0.863386		5.88673	0.864688		5.88673	0.864997		5.88673	0.864463		5.88673	0.86312		5.88673	0.857286		5.88673	0.856432		5.88673	0.85923		5.88673	0.861322		5.88673	0.863357		5.88673	0.860523		5.88673	0.862375		5.88673	0.862904		5.88673	0.865135		5.88673	0.862587
5.96125	0.864194		5.96125	0.863594		5.96125	0.863631		5.96125	0.864157		5.96125	0.864428		5.96125	0.8624		5.96125	0.857317		5.96125	0.85547		5.96125	0.857194		5.96125	0.858161		5.96125	0.864537		5.96125	0.859258		5.96125	0.862851		5.96125	0.862233		5.96125	0.862727		5.96125	0.862684
6.03576	0.864714		6.03576	0.862735		6.03576	0.865333		6.03576	0.863829		6.03576	0.86349		6.03576	0.861893		6.03576	0.855007		6.03576	0.856342		6.03576	0.85555		6.03576	0.858186		6.03576	0.863442		6.03576	0.858527		6.03576	0.862196		6.03576	0.861344		6.03576	0.864282		6.03576	0.860209
6.11028	0.86394		6.11028	0.861751		6.11028	0.86344		6.11028	0.862339		6.11028	0.863845		6.11028	0.861587		6.11028	0.855339		6.11028	0.854532		6.11028	0.855498		6.11028	0.857595		6.11028	0.862397		6.11028	0.858495		6.11028	0.861866		6.11028	0.860727		6.11028	0.862584		6.11028	0.861358
6.18479	0.863797		6.18479	0.860907		6.18479	0.863817		6.18479	0.862899		6.18479	0.863631		6.18479	0.861265		6.18479	0.856732		6.18479	0.854127		6.18479	0.855427		6.18479	0.857232		6.18479	0.863017		6.18479	0.858917		6.18479	0.860597		6.18479	0.861047		6.18479	0.861671		6.18479	0.861041
6.25931	0.863586		6.25931	0.86071		6.25931	0.863495		6.25931	0.862128		6.25931	0.861798		6.25931	0.86074		6.25931	0.856415		6.25931	0.854595		6.25931	0.855569		6.25931	0.856975		6.25931	0.862456		6.25931	0.857944		6.25931	0.860393		6.25931	0.859649		6.25931	0.861606		6.25931	0.860444
6.33383	0.863115		6.33383	0.862003		6.33383	0.863289		6.33383	0.861513		6.33383	0.862476		6.33383	0.859308		6.33383	0.855235		6.33383	0.851969		6.33383	0.853814		6.33383	0.855181		6.33383	0.862316		6.33383	0.85731		6.33383	0.859858		6.33383	0.859406		6.33383	0.860571		6.33383	0.859304
6.40834	0.862482		6.40834	0.860308		6.40834	0.861613		6.40834	0.860547		6.40834	0.861085		6.40834	0.85908		6.40834	0.85182		6.40834	0.852935		6.40834	0.852773		6.40834	0.855108		6.40834	0.859258		6.40834	0.857033		6.40834	0.858811		6.40834	0.858616		6.40834	0.860381		6.40834	0.859041
6.48286	0.862103		6.48286	0.860819		6.48286	0.862223		6.48286	0.860634		6.48286	0.861104		6.48286	0.858927		6.48286	0.853135		6.48286	0.852006		6.48286	0.853734		6.48286	0.855029		6.48286	0.860851		6.48286	0.856907		6.48286	0.857943		6.48286	0.857684		6.48286	0.859706		6.48286	0.858352
6.55737	0.863304		6.55737	0.859521		6.55737	0.860832		6.55737	0.859144		6.55737	0.860041		6.55737	0.85739		6.55737	0.852602		6.55737	0.851586		6.55737	0.853112		6.55737	0.854828		6.55737	0.86048		6.55737	0.855832		6.55737	0.857168		6.55737	0.857286		6.55737	0.860006		6.55737	0.858154
6.63189	0.860819		6.63189	0.858456		6.63189	0.860124		6.63189	0.859981		6.63189	0.859849		6.63189	0.858147		6.63189	0.851322		6.63189	0.851505		6.63189	0.852363		6.63189	0.85424		6.63189	0.860049		6.63189	0.855613		6.63189	0.858229		6.63189	0.857064		6.63189	0.858709		6.63189	0.855965
6.7064	0.860856		6.7064	0.859712		6.7064	0.861581		6.7064	0.859345		6.7064	0.860844		6.7064	0.856916		6.7064	0.851886		6.7064	0.850994		6.7064	0.852		6.7064	0.854921		6.7064	0.85854		6.7064	0.853878		6.7064	0.856247		6.7064	0.857184		6.7064	0.858555		6.7064	0.857045
6.78092	0.860199		6.78092	0.858468		6.78092	0.858475		6.78092	0.860065		6.78092	0.85887		6.78092	0.857006		6.78092	0.851629		6.78092	0.850063		6.78092	0.850892		6.78092	0.851655		6.78092	0.858816		6.78092	0.85542		6.78092	0.854961		6.78092	0.857007		6.78092	0.85802		6.78092	0.857258
6.85544	0.860373		6.85544	0.856867		6.85544	0.858951		6.85544	0.857626		6.85544	0.859158		6.85544	0.856469		6.85544	0.851407		6.85544	0.849129		6.85544	0.850836		6.85544	0.852564		6.85544	0.857951		6.85544	0.85438		6.85544	0.856937		6.85544	0.857049		6.85544	0.859025		6.85544	0.856194
6.92995	0.858952		6.92995	0.858193		6.92995	0.857868		6.92995	0.85678		6.92995	0.858669		6.92995	0.855358		6.92995	0.84956		6.92995	0.848229		6.92995	0.850587		6.92995	0.853518		6.92995	0.857357		6.92995	0.852944		6.92995	0.856022		6.92995	0.855807		6.92995	0.858159		6.92995	0.857078
7.00447	0.857965		7.00447	0.856915		7.00447	0.859061		7.00447	0.857177		7.00447	0.857829		7.00447	0.855334		7.00447	0.848307		7.00447	0.847603		7.00447	0.849491		7.00447	0.852739		7.00447	0.856484		7.00447	0.853086		7.00447	0.856619		7.00447	0.855175		7.00447	0.856839		7.00447	0.855755
7.07898	0.859016		7.07898	0.85786		7.07898	0.856753		7.07898	0.857051		7.07898	0.857197		7.07898	0.854632		7.07898	0.850555		7.07898	0.847899		7.07898	0.850633		7.07898	0.851868		7.07898	0.856279		7.07898	0.853272		7.07898	0.85513		7.07898	0.854759		7.07898	0.857252		7.07898	0.856807
7.1535	0.859022		7.1535	0.855659		7.1535	0.858315		7.1535	0.856322		7.1535	0.856707		7.1535	0.855229		7.1535	0.848908		7.1535	0.847674		7.1535	0.84902		7.1535	0.851292		7.1535	0.856295		7.1535	0.853179		7.1535	0.853885		7.1535	0.85469		7.1535	0.857288		7.1535	0.855054
7.22801	0.858389		7.22801	0.854095		7.22801	0.857191		7.22801	0.85637		7.22801	0.856522		7.22801	0.853125		7.22801	0.849381		7.22801	0.847435		7.22801	0.847086		7.22801	0.850758		7.22801	0.857506		7.22801	0.852426		7.22801	0.854873		7.22801	0.85374		7.22801	0.855668		7.22801	0.854896
7.30253	0.857732		7.30253	0.855272		7.30253	0.856146		7.30253	0.855106		7.30253	0.856449		7.30253	0.854452		7.30253	0.848699		7.30253	0.847307		7.30253	0.847887		7.30253	0.850309		7.30253	0.854975		7.30253	0.851177		7.30253	0.854262		7.30253	0.853357		7.30253	0.856001		7.30253	0.854207
7.37704	0.857668		7.37704	0.854634		7.37704	0.856152		7.37704	0.856202		7.37704	0.855755		7.37704	0.852492		7.37704	0.846902		7.37704	0.845905		7.37704	0.847083		7.37704	0.849654		7.37704	0.855794		7.37704	0.850413		7.37704	0.853926		7.37704	0.855073		7.37704	0.856637		7.37704	0.851524
7.45156	0.858032		7.45156	0.854703		7.45156	0.856227		7.45156	0.855356		7.45156	0.856322		7.45156	0.853032		7.45156	0.847381		7.45156	0.845326		7.45156	0.847132		7.45156	0.850325		7.45156	0.854704		7.45156	0.849979		7.45156	0.85145		7.45156	0.852168		7.45156	0.856673		7.45156	0.854179
7.52608	0.8575		7.52608	0.85378		7.52608	0.855969		7.52608	0.854097		7.52608	0.855874		7.52608	0.852918		7.52608	0.846883		7.52608	0.844803		7.52608	0.846378		7.52608	0.850112		7.52608	0.854902		7.52608	0.849097		7.52608	0.852774		7.52608	0.852689		7.52608	0.854841		7.52608	0.852981
7.60059	0.855831		7.60059	0.854773		7.60059	0.855533		7.60059	0.853501		7.60059	0.854492		7.60059	0.851333		7.60059	0.846892		7.60059	0.845093		7.60059	0.847089		7.60059	0.8485		7.60059	0.854944		7.60059	0.850339		7.60059	0.852251		7.60059	0.852587		7.60059	0.854014		7.60059	0.85331
7.67511	0.855614		7.67511	0.853514		7.67511	0.856131		7.67511	0.854672		7.67511	0.854177		7.67511	0.851529		7.67511	0.846476		7.67511	0.844516		7.67511	0.84554		7.67511	0.848249		7.67511	0.855411		7.67511	0.848768		7.67511	0.852885		7.67511	0.851695		7.67511	0.852385		7.67511	0.852512
7.74962	0.857103		7.74962	0.852385		7.74962	0.855321		7.74962	0.852715		7.74962	0.853787		7.74962	0.851415		7.74962	0.845609		7.74962	0.844946		7.74962	0.846843		7.74962	0.848401		7.74962	0.85413		7.74962	0.849016		7.74962	0.852233		7.74962	0.852414		7.74962	0.853223		7.74962	0.8531
7.82414	0.855773		7.82414	0.85217		7.82414	0.854323		7.82414	0.85304		7.82414	0.854722		7.82414	0.850364		7.82414	0.845252		7.82414	0.843949		7.82414	0.845322		7.82414	0.847956		7.82414	0.854792		7.82414	0.848839		7.82414	0.850959		7.82414	0.852012		7.82414	0.853342		7.82414	0.851097
7.89865	0.856332		7.89865	0.851535		7.89865	0.854209		7.89865	0.851781		7.89865	0.853567		7.89865	0.851306		7.89865	0.844808		7.89865	0.843959		7.89865	0.844149		7.89865	0.84663		7.89865	0.853843		7.89865	0.849557		7.89865	0.850093		7.89865	0.85215		7.89865	0.853651		7.89865	0.852356
7.97317	0.854667		7.97317	0.852064		7.97317	0.855327		7.97317	0.851784		7.97317	0.853174		7.97317	0.850613		7.97317	0.844845		7.97317	0.841657		7.97317	0.843912		7.97317	0.847619		7.97317	0.852381		7.97317	0.847068		7.97317	0.848532		7.97317	0.850905		7.97317	0.852631		7.97317	0.851311
8.04768	0.855119		8.04768	0.852167		8.04768	0.852398		8.04768	0.853862		8.04768	0.852407		8.04768	0.849617		8.04768	0.845581		8.04768	0.842965		8.04768	0.84458		8.04768	0.847311		8.04768	0.855242		8.04768	0.848662		8.04768	0.849281		8.04768	0.850946		8.04768	0.853143		8.04768	0.851289
8.1222	0.854932		8.1222	0.851323		8.1222	0.853771		8.1222	0.851803		8.1222	0.853033		8.1222	0.85019		8.1222	0.842842		8.1222	0.842458		8.1222	0.843364		8.1222	0.846547		8.1222	0.853894		8.1222	0.846711		8.1222	0.8504		8.1222	0.851441		8.1222	0.852185		8.1222	0.849229
8.19672	0.854428		8.19672	0.851426		8.19672	0.853637		8.19672	0.852354		8.19672	0.852423		8.19672	0.849809		8.19672	0.843868		8.19672	0.841368		8.19672	0.842754		8.19672	0.844976		8.19672	0.85397		8.19672	0.847139		8.19672	0.849529		8.19672	0.850087		8.19672	0.85317		8.19672	0.851109
8.27123	0.855574		8.27123	0.850899		8.27123	0.852987		8.27123	0.851498		8.27123	0.851905		8.27123	0.850067		8.27123	0.842663		8.27123	0.841411		8.27123	0.842751		8.27123	0.846834		8.27123	0.850731		8.27123	0.847046		8.27123	0.848857		8.27123	0.84865		8.27123	0.851543		8.27123	0.850311
8.34575	0.853471		8.34575	0.851523		8.34575	0.8524		8.34575	0.850435		8.34575	0.85271		8.34575	0.848515		8.34575	0.842097		8.34575	0.840527		8.34575	0.842751		8.34575	0.844919		8.34575	0.851959		8.34575	0.846431		8.34575	0.850982		8.34575	0.849207		8.34575	0.850844		8.34575	0.850122
8.42026	0.85385		8.42026	0.851398		8.42026	0.850679		8.42026	0.850737		8.42026	0.851572		8.42026	0.848689		8.42026	0.842585		8.42026	0.84143		8.42026	0.842098		8.42026	0.844801		8.42026	0.851585		8.42026	0.847554		8.42026	0.848523		8.42026	0.848164		8.42026	0.850654		8.42026	0.847979
8.49478	0.85426		8.49478	0.849906		8.49478	0.852313		8.49478	0.850282		8.49478	0.850061		8.49478	0.848035		8.49478	0.841599		8.49478	0.840461		8.49478	0.841455		8.49478	0.84393		8.49478	0.8509		8.49478	0.84664		8.49478	0.848135		8.49478	0.849335		8.49478	0.851064		8.49478	0.849918
8.56929	0.853982		8.56929	0.850288		8.56929	0.852008		8.56929	0.850222		8.56929	0.850552		8.56929	0.848413		8.56929	0.840995		8.56929	0.838752		8.56929	0.842086		8.56929	0.844913		8.56929	0.850799		8.56929	0.845162		8.56929	0.849287		8.56929	0.848147		8.56929	0.850389		8.56929	0.849597
8.64381	0.854123		8.64381	0.848759		8.64381	0.852525		8.64381	0.849183		8.64381	0.849994		8.64381	0.84684		8.64381	0.84179		8.64381	0.838833		8.64381	0.840137		8.64381	0.84503		8.64381	0.851227		8.64381	0.845297		8.64381	0.849187		8.64381	0.84726		8.64381	0.850229		8.64381	0.849933
8.71833	0.852548		8.71833	0.850651		8.71833	0.850896		8.71833	0.849884		8.71833	0.850433		8.71833	0.846129		8.71833	0.841464		8.71833	0.839692		8.71833	0.840759		8.71833	0.843237		8.71833	0.850272		8.71833	0.845368		8.71833	0.847836		8.71833	0.847467		8.71833	0.851487		8.71833	0.848348
8.79284	0.851084		8.79284	0.849068		8.79284	0.85058		8.79284	0.849466		8.79284	0.848042		8.79284	0.846888		8.79284	0.840444		8.79284	0.839527		8.79284	0.840251		8.79284	0.844652		8.79284	0.849946		8.79284	0.844016		8.79284	0.846948		8.79284	0.848431		8.79284	0.850419		8.79284	0.848268
8.86736	0.852249		8.86736	0.849325		8.86736	0.85047		8.86736	0.848225		8.86736	0.849413		8.86736	0.846708		8.86736	0.839551		8.86736	0.837942		8.86736	0.84002		8.86736	0.843386		8.86736	0.849797		8.86736	0.843291		8.86736	0.84779		8.86736	0.847497		8.86736	0.84967		8.86736	0.848659
8.94187	0.852912		8.94187	0.848463		8.94187	0.850696		8.94187	0.848981		8.94187	0.84921		8.94187	0.846768		8.94187	0.840397		8.94187	0.837032		8.94187	0.841304		8.94187	0.843358		8.94187	0.850087		8.94187	0.846015		8.94187	0.847766		8.94187	0.848859		8.94187	0.849099		8.94187	0.847399
9.01639	0.851433		9.01639	0.849074		9.01639	0.849575		9.01639	0.847852		9.01639	0.849823		9.01639	0.846084		9.01639	0.839041		9.01639	0.837727		9.01639	0.838751		9.01639	0.843141		9.01639	0.849321		9.01639	0.842699		9.01639	0.8471		9.01639	0.846691		9.01639	0.846985		9.01639	0.848585
9.0909	0.851631		9.0909	0.848953		9.0909	0.849256		9.0909	0.84831		9.0909	0.849074		9.0909	0.845106		9.0909	0.838769		9.0909	0.837562		9.0909	0.840014		9.0909	0.844013		9.0909	0.84934		9.0909	0.844383		9.0909	0.84655		9.0909	0.848674		9.0909	0.848787		9.0909	0.846397
9.16542	0.851726		9.16542	0.849129		9.16542	0.849671		9.16542	0.846662		9.16542	0.849969		9.16542	0.845466		9.16542	0.83828		9.16542	0.837521		9.16542	0.838634		9.16542	0.842909		9.16542	0.85016		9.16542	0.843407		9.16542	0.846492		9.16542	0.845874		9.16542	0.847193		9.16542	0.847805
9.23993	0.85146		9.23993	0.847921		9.23993	0.847421		9.23993	0.847204		9.23993	0.848174		9.23993	0.844766		9.23993	0.838847		9.23993	0.836553		9.23993	0.838046		9.23993	0.841036		9.23993	0.849557		9.23993	0.844389		9.23993	0.846772		9.23993	0.845152		9.23993	0.846756		9.23993	0.846927
9.31445	0.852087		9.31445	0.847776		9.31445	0.848542		9.31445	0.845925		9.31445	0.846751		9.31445	0.843515		9.31445	0.838509		9.31445	0.837699		9.31445	0.838351		9.31445	0.841392		9.31445	0.849146		9.31445	0.842744		9.31445	0.845752		9.31445	0.846041		9.31445	0.847026		9.31445	0.846671
9.38897	0.851931		9.38897	0.848651		9.38897	0.849866		9.38897	0.847165		9.38897	0.847787		9.38897	0.845523		9.38897	0.837989		9.38897	0.835824		9.38897	0.83755		9.38897	0.84186		9.38897	0.848197		9.38897	0.842876		9.38897	0.846688		9.38897	0.847018		9.38897	0.847993		9.38897	0.844059
9.46348	0.850158		9.46348	0.848206		9.46348	0.849302		9.46348	0.845798		9.46348	0.847854		9.46348	0.842882		9.46348	0.837451		9.46348	0.836226		9.46348	0.838342		9.46348	0.840477		9.46348	0.847589		9.46348	0.84286		9.46348	0.84558		9.46348	0.845963		9.46348	0.846875		9.46348	0.845897
9.538	0.849776		9.538	0.846668		9.538	0.847845		9.538	0.847882		9.538	0.845794		9.538	0.844361		9.538	0.837711		9.538	0.835902		9.538	0.837529		9.538	0.840299		9.538	0.848622		9.538	0.841266		9.538	0.844366		9.538	0.844448		9.538	0.846235		9.538	0.846964
9.61251	0.848685		9.61251	0.846699		9.61251	0.847717		9.61251	0.846099		9.61251	0.847044		9.61251	0.845412		9.61251	0.837667		9.61251	0.835503		9.61251	0.838299		9.61251	0.84054		9.61251	0.848772		9.61251	0.840661		9.61251	0.844948		9.61251	0.84361		9.61251	0.845694		9.61251	0.845534
9.68703	0.849342		9.68703	0.846581		9.68703	0.846942		9.68703	0.846909		9.68703	0.847152		9.68703	0.843704		9.68703	0.836443		9.68703	0.83431		9.68703	0.836879		9.68703	0.840244		9.68703	0.848087		9.68703	0.841556		9.68703	0.844705		9.68703	0.845436		9.68703	0.847217		9.68703	0.844247
9.76154	0.849914		9.76154	0.846853		9.76154	0.846724		9.76154	0.845889		9.76154	0.846534		9.76154	0.843779		9.76154	0.838453		9.76154	0.83451		9.76154	0.837295		9.76154	0.84062		9.76154	0.846637		9.76154	0.840989		9.76154	0.843288		9.76154	0.844766		9.76154	0.846024		9.76154	0.845052
9.83606	0.850219		9.83606	0.845437		9.83606	0.846811		9.83606	0.844497		9.83606	0.845959		9.83606	0.842578		9.83606	0.836502		9.83606	0.835634		9.83606	0.837276		9.83606	0.839484		9.83606	0.84769		9.83606	0.84127		9.83606	0.844016		9.83606	0.844496		9.83606	0.846146		9.83606	0.84525
9.91057	0.849492		9.91057	0.846193		9.91057	0.847554		9.91057	0.84528		9.91057	0.84732		9.91057	0.841717		9.91057	0.835785		9.91057	0.83484		9.91057	0.836704		9.91057	0.838002		9.91057	0.848253		9.91057	0.839982		9.91057	0.843744		9.91057	0.84437		9.91057	0.844808		9.91057	0.845415
9.98509	0.849058		9.98509	0.846136		9.98509	0.848332		9.98509	0.845139		9.98509	0.845387		9.98509	0.842437		9.98509	0.836102		9.98509	0.8336		9.98509	0.834856		9.98509	0.839742		9.98509	0.847665		9.98509	0.840893		9.98509	0.84277		9.98509	0.843676		9.98509	0.846098		9.98509	0.844324
10.0596	0.848529		10.0596	0.844807		10.0596	0.846079		10.0596	0.843793		10.0596	0.845531		10.0596	0.841609		10.0596	0.835231		10.0596	0.834538		10.0596	0.836048		10.0596	0.839869		10.0596	0.846837		10.0596	0.841163		10.0596	0.843785		10.0596	0.843095		10.0596	0.845025		10.0596	0.844418
10.1341	0.849015		10.1341	0.844411		10.1341	0.846953		10.1341	0.843471		10.1341	0.845867		10.1341	0.841816		10.1341	0.835682		10.1341	0.834102		10.1341	0.835718		10.1341	0.840534		10.1341	0.847082		10.1341	0.839982		10.1341	0.843548		10.1341	0.844847		10.1341	0.844683		10.1341	0.842553
10.2086	0.849201		10.2086	0.843963		10.2086	0.844811		10.2086	0.845277		10.2086	0.846073		10.2086	0.841597		10.2086	0.835416		10.2086	0.834105		10.2086	0.837631		10.2086	0.839252		10.2086	0.846297		10.2086	0.840091		10.2086	0.842592		10.2086	0.843355		10.2086	0.844145		10.2086	0.843226
10.2832	0.849764		10.2832	0.844305		10.2832	0.845911		10.2832	0.844663		10.2832	0.845279		10.2832	0.841126		10.2832	0.833619		10.2832	0.832946		10.2832	0.83505		10.2832	0.838254		10.2832	0.84644		10.2832	0.838729		10.2832	0.842168		10.2832	0.84293		10.2832	0.844415		10.2832	0.842973
10.3577	0.849981		10.3577	0.845769		10.3577	0.845803		10.3577	0.842965		10.3577	0.844693		10.3577	0.840438		10.3577	0.834198		10.3577	0.833329		10.3577	0.834764		10.3577	0.840505		10.3577	0.846981		10.3577	0.841038		10.3577	0.84168		10.3577	0.842559		10.3577	0.844189		10.3577	0.843284
10.4322	0.85083		10.4322	0.843321		10.4322	0.845118		10.4322	0.842417		10.4322	0.843712		10.4322	0.84166		10.4322	0.833722		10.4322	0.833691		10.4322	0.834416		10.4322	0.83756		10.4322	0.846429		10.4322	0.839627		10.4322	0.841683		10.4322	0.842885		10.4322	0.844552		10.4322	0.843869
10.5067	0.848743		10.5067	0.845101		10.5067	0.845902		10.5067	0.843013		10.5067	0.844362		10.5067	0.842461		10.5067	0.833726		10.5067	0.832056		10.5067	0.83392		10.5067	0.838168		10.5067	0.84693		10.5067	0.838034		10.5067	0.843188		10.5067	0.841906		10.5067	0.844472		10.5067	0.841571
10.5812	0.847095		10.5812	0.843833		10.5812	0.844642		10.5812	0.842676		10.5812	0.843918		10.5812	0.840519		10.5812	0.832639		10.5812	0.831654		10.5812	0.834976		10.5812	0.837646		10.5812	0.84704		10.5812	0.838646		10.5812	0.841329		10.5812	0.841313		10.5812	0.843446		10.5812	0.843565
10.6557	0.850381		10.6557	0.843902		10.6557	0.845838		10.6557	0.842191		10.6557	0.844699		10.6557	0.840636		10.6557	0.833331		10.6557	0.832205		10.6557	0.834662		10.6557	0.838247		10.6557	0.845283		10.6557	0.838736		10.6557	0.841633		10.6557	0.840912		10.6557	0.842807		10.6557	0.841132
10.7302	0.848825		10.7302	0.843824		10.7302	0.844366		10.7302	0.841998		10.7302	0.84343		10.7302	0.840492		10.7302	0.833256		10.7302	0.831887		10.7302	0.833689		10.7302	0.837103		10.7302	0.846232		10.7302	0.839338		10.7302	0.841712		10.7302	0.843493		10.7302	0.84259		10.7302	0.841726
10.8048	0.849687		10.8048	0.843654		10.8048	0.844511		10.8048	0.841679		10.8048	0.842806		10.8048	0.841189		10.8048	0.831638		10.8048	0.831657		10.8048	0.833911		10.8048	0.838247		10.8048	0.846302		10.8048	0.839264		10.8048	0.840914		10.8048	0.841678		10.8048	0.842726		10.8048	0.841922
10.8793	0.848376		10.8793	0.843485		10.8793	0.843826		10.8793	0.841811		10.8793	0.843099		10.8793	0.839583		10.8793	0.833973		10.8793	0.831965		10.8793	0.832858		10.8793	0.837704		10.8793	0.845303		10.8793	0.837985		10.8793	0.84087		10.8793	0.842547		10.8793	0.842816		10.8793	0.841696
10.9538	0.847967		10.9538	0.843857		10.9538	0.843977		10.9538	0.841742		10.9538	0.842839		10.9538	0.83958		10.9538	0.83222		10.9538	0.83095		10.9538	0.833345		10.9538	0.836804		10.9538	0.845877		10.9538	0.838336		10.9538	0.841639		10.9538	0.841534		10.9538	0.842753		10.9538	0.841693
11.0283	0.847236		11.0283	0.843712		11.0283	0.843637		11.0283	0.842028		11.0283	0.842706		11.0283	0.839793		11.0283	0.832282		11.0283	0.831065		11.0283	0.833381		11.0283	0.837118		11.0283	0.844458		11.0283	0.838298		11.0283	0.841177		11.0283	0.840807		11.0283	0.843488		11.0283	0.841004
11.1028	0.849299		11.1028	0.842571		11.1028	0.843696		11.1028	0.840875		11.1028	0.844989		11.1028	0.840111		11.1028	0.831666		11.1028	0.830994		11.1028	0.834302		11.1028	0.837281		11.1028	0.846367		11.1028	0.838034		11.1028	0.842677		11.1028	0.841334		11.1028	0.842729		11.1028	0.841196
11.1773	0.847361		11.1773	0.842574		11.1773	0.844079		11.1773	0.839999		11.1773	0.842375		11.1773	0.839886		11.1773	0.83154		11.1773	0.830642		11.1773	0.832772		11.1773	0.837739		11.1773	0.845773		11.1773	0.838188		11.1773	0.841703		11.1773	0.841972		11.1773	0.842346		11.1773	0.840519
11.2519	0.847942		11.2519	0.841884		11.2519	0.84353		11.2519	0.841775		11.2519	0.843828		11.2519	0.839226		11.2519	0.83319		11.2519	0.831224		11.2519	0.833046		11.2519	0.83674		11.2519	0.845196		11.2519	0.83794		11.2519	0.841694		11.2519	0.841993		11.2519	0.841968		11.2519	0.841906
11.3264	0.847147		11.3264	0.843212		11.3264	0.843983		11.3264	0.840899		11.3264	0.841616		11.3264	0.838181		11.3264	0.831162		11.3264	0.829131		11.3264	0.831722		11.3264	0.836905		11.3264	0.845933		11.3264	0.838758		11.3264	0.841449		11.3264	0.841502		11.3264	0.84132		11.3264	0.840269
11.4009	0.846356		11.4009	0.841333		11.4009	0.84369		11.4009	0.840583		11.4009	0.841898		11.4009	0.839229		11.4009	0.829769		11.4009	0.830162		11.4009	0.832507		11.4009	0.836018		11.4009	0.844314		11.4009	0.836556		11.4009	0.840443		11.4009	0.841166		11.4009	0.843366		11.4009	0.839836
11.4754	0.84822		11.4754	0.842659		11.4754	0.84382		11.4754	0.840502		11.4754	0.842193		11.4754	0.83849		11.4754	0.830201		11.4754	0.830009		11.4754	0.83166		11.4754	0.837427		11.4754	0.844827		11.4754	0.837812		11.4754	0.840659		11.4754	0.838441		11.4754	0.840829		11.4754	0.842004
11.5499	0.846768		11.5499	0.842038		11.5499	0.843742		11.5499	0.840092		11.5499	0.840729		11.5499	0.837848		11.5499	0.83037		11.5499	0.829897		11.5499	0.831365		11.5499	0.835541		11.5499	0.844283		11.5499	0.83596		11.5499	0.840548		11.5499	0.840663		11.5499	0.841457		11.5499	0.839815
11.6244	0.84613		11.6244	0.84162		11.6244	0.843219		11.6244	0.841772		11.6244	0.841432		11.6244	0.838757		11.6244	0.829252		11.6244	0.828568		11.6244	0.831146		11.6244	0.834667		11.6244	0.845198		11.6244	0.83841		11.6244	0.840051		11.6244	0.840193		11.6244	0.842714		11.6244	0.84001
11.6989	0.847016		11.6989	0.84241		11.6989	0.843031		11.6989	0.840152		11.6989	0.841722		11.6989	0.838658		11.6989	0.831146		11.6989	0.829798		11.6989	0.83154		11.6989	0.835439		11.6989	0.844258		11.6989	0.835555		11.6989	0.840651		11.6989	0.840858		11.6989	0.841475		11.6989	0.841388
11.7735	0.847251		11.7735	0.841832		11.7735	0.84184		11.7735	0.839324		11.7735	0.842375		11.7735	0.838064		11.7735	0.829922		11.7735	0.828371		11.7735	0.832747		11.7735	0.834663		11.7735	0.844559		11.7735	0.836791		11.7735	0.839642		11.7735	0.841247		11.7735	0.839619		11.7735	0.840028
11.848	0.848031		11.848	0.841139		11.848	0.842853		11.848	0.839948		11.848	0.84074		11.848	0.838304		11.848	0.829311		11.848	0.829714		11.848	0.831202		11.848	0.834218		11.848	0.842937		11.848	0.836321		11.848	0.839812		11.848	0.839325		11.848	0.840252		11.848	0.840248
11.9225	0.847526		11.9225	0.841121		11.9225	0.844076		11.9225	0.839568		11.9225	0.841871		11.9225	0.83717		11.9225	0.831581		11.9225	0.827686		11.9225	0.831115		11.9225	0.835338		11.9225	0.843636		11.9225	0.835767		11.9225	0.838859		11.9225	0.838534		11.9225	0.840764		11.9225	0.839772
11.997	0.847184		11.997	0.840546		11.997	0.84159		11.997	0.838695		11.997	0.839165		11.997	0.837566		11.997	0.829352		11.997	0.828315		11.997	0.830746		11.997	0.83578		11.997	0.843424		11.997	0.836057		11.997	0.83849		11.997	0.838893		11.997	0.839592		11.997	0.840382
12.0715	0.846683		12.0715	0.8407		12.0715	0.842485		12.0715	0.839812		12.0715	0.83993		12.0715	0.838184		12.0715	0.830686		12.0715	0.82806		12.0715	0.830931		12.0715	0.834091		12.0715	0.843503		12.0715	0.835558		12.0715	0.839946		12.0715	0.838504		12.0715	0.839824		12.0715	0.838769
12.146	0.847144		12.146	0.840068		12.146	0.842122		12.146	0.839402		12.146	0.841017		12.146	0.837749		12.146	0.828808		12.146	0.828253		12.146	0.830669		12.146	0.835261		12.146	0.844106		12.146	0.836234		12.146	0.839706		12.146	0.838875		12.146	0.840184		12.146	0.83851
12.2206	0.845283		12.2206	0.84051		12.2206	0.843153		12.2206	0.838047		12.2206	0.839778		12.2206	0.837176		12.2206	0.828942		12.2206	0.828867		12.2206	0.831426		12.2206	0.835268		12.2206	0.842155		12.2206	0.835944		12.2206	0.840472		12.2206	0.838354		12.2206	0.841882		12.2206	0.839721
12.2951	0.846472		12.2951	0.841472		12.2951	0.841649		12.2951	0.839312		12.2951	0.840984		12.2951	0.836155		12.2951	0.829261		12.2951	0.828652		12.2951	0.830789		12.2951	0.834492		12.2951	0.843171		12.2951	0.834556		12.2951	0.838847		12.2951	0.83913		12.2951	0.838581		12.2951	0.83959
12.3696	0.847172		12.3696	0.839384		12.3696	0.842189		12.3696	0.839074		12.3696	0.841264		12.3696	0.836954		12.3696	0.829374		12.3696	0.826658		12.3696	0.832076		12.3696	0.833837		12.3696	0.844407		12.3696	0.835886		12.3696	0.839554		12.3696	0.839744		12.3696	0.839943		12.3696	0.839885
12.4441	0.846985		12.4441	0.840104		12.4441	0.841257		12.4441	0.840071		12.4441	0.839984		12.4441	0.836858		12.4441	0.830492		12.4441	0.828705		12.4441	0.830281		12.4441	0.834829		12.4441	0.843562		12.4441	0.834927		12.4441	0.838882		12.4441	0.83987		12.4441	0.839485		12.4441	0.839117
12.5186	0.845711		12.5186	0.839559		12.5186	0.840464		12.5186	0.838692		12.5186	0.840393		12.5186	0.836188		12.5186	0.82949		12.5186	0.827247		12.5186	0.831257		12.5186	0.834349		12.5186	0.842949		12.5186	0.835239		12.5186	0.838218		12.5186	0.839639		12.5186	0.839613		12.5186	0.838181
12.5931	0.848468		12.5931	0.840222		12.5931	0.842189		12.5931	0.839387		12.5931	0.840236		12.5931	0.83566		12.5931	0.828022		12.5931	0.82772		12.5931	0.829813		12.5931	0.833166		12.5931	0.843867		12.5931	0.834785		12.5931	0.837675		12.5931	0.838612		12.5931	0.840157		12.5931	0.837873
12.6677	0.84612		12.6677	0.839484		12.6677	0.840159		12.6677	0.838547		12.6677	0.840033		12.6677	0.835906		12.6677	0.828829		12.6677	0.827154		12.6677	0.830361		12.6677	0.833229		12.6677	0.84272		12.6677	0.835677		12.6677	0.837803		12.6677	0.838684		12.6677	0.838977		12.6677	0.837934
12.7422	0.844968		12.7422	0.838576		12.7422	0.84132		12.7422	0.838324		12.7422	0.8392		12.7422	0.834114		12.7422	0.828216		12.7422	0.825998		12.7422	0.829573		12.7422	0.833617		12.7422	0.843365		12.7422	0.836141		12.7422	0.838388		12.7422	0.839702		12.7422	0.838204		12.7422	0.837995
12.8167	0.845787		12.8167	0.838464		12.8167	0.841123		12.8167	0.8383		12.8167	0.840089		12.8167	0.835522		12.8167	0.826795		12.8167	0.826988		12.8167	0.829333		12.8167	0.833274		12.8167	0.843599		12.8167	0.834682		12.8167	0.839271		12.8167	0.838241		12.8167	0.838138		12.8167	0.838483
12.8912	0.845751		12.8912	0.839245		12.8912	0.84038		12.8912	0.838319		12.8912	0.839732		12.8912	0.835675		12.8912	0.826939		12.8912	0.827094		12.8912	0.828437		12.8912	0.833258		12.8912	0.844117		12.8912	0.835361		12.8912	0.837265		12.8912	0.83816		12.8912	0.839628		12.8912	0.838206
12.9657	0.845582		12.9657	0.839366		12.9657	0.840969		12.9657	0.837231		12.9657	0.839583		12.9657	0.835876		12.9657	0.828253		12.9657	0.82706		12.9657	0.829268		12.9657	0.832091		12.9657	0.843557		12.9657	0.834367		12.9657	0.837949		12.9657	0.838471		12.9657	0.83953		12.9657	0.838324
13.0402	0.844604		13.0402	0.839087		13.0402	0.840452		13.0402	0.837078		13.0402	0.839976		13.0402	0.833844		13.0402	0.82708		13.0402	0.827596		13.0402	0.82921		13.0402	0.832565		13.0402	0.842943		13.0402	0.834582		13.0402	0.836836		13.0402	0.837743		13.0402	0.838739		13.0402	0.837309
13.1147	0.845029		13.1147	0.838864		13.1147	0.84148		13.1147	0.838349		13.1147	0.839198		13.1147	0.835252		13.1147	0.827245		13.1147	0.826867		13.1147	0.830373		13.1147	0.831413		13.1147	0.842611		13.1147	0.834695		13.1147	0.8373		13.1147	0.837881		13.1147	0.838433		13.1147	0.838084
13.1893	0.845405		13.1893	0.839072		13.1893	0.8397		13.1893	0.838123		13.1893	0.839368		13.1893	0.8362		13.1893	0.827374		13.1893	0.826845		13.1893	0.82908		13.1893	0.833181		13.1893	0.843075		13.1893	0.833674		13.1893	0.837964		13.1893	0.837354		13.1893	0.838733		13.1893	0.836849
13.2638	0.845243		13.2638	0.838591		13.2638	0.8404		13.2638	0.836168		13.2638	0.83917		13.2638	0.835381		13.2638	0.825311		13.2638	0.826817		13.2638	0.828898		13.2638	0.833229		13.2638	0.843579		13.2638	0.833362		13.2638	0.837742		13.2638	0.837147		13.2638	0.838691		13.2638	0.836815
13.3383	0.845243		13.3383	0.838549		13.3383	0.839207		13.3383	0.836879		13.3383	0.83852		13.3383	0.834742		13.3383	0.828053		13.3383	0.827051		13.3383	0.827833		13.3383	0.833722		13.3383	0.842611		13.3383	0.83428		13.3383	0.837774		13.3383	0.83854		13.3383	0.838174		13.3383	0.83759
13.4128	0.845399		13.4128	0.837184		13.4128	0.839152		13.4128	0.837502		13.4128	0.837029		13.4128	0.834381		13.4128	0.826813		13.4128	0.825472		13.4128	0.827695		13.4128	0.832072		13.4128	0.843838		13.4128	0.833751		13.4128	0.837403		13.4128	0.838285		13.4128	0.837383		13.4128	0.836913
13.4873	0.846123		13.4873	0.838791		13.4873	0.840464		13.4873	0.83672		13.4873	0.838113		13.4873	0.834667		13.4873	0.826773		13.4873	0.826845		13.4873	0.829046		13.4873	0.831525		13.4873	0.843129		13.4873	0.835242		13.4873	0.837982		13.4873	0.837827		13.4873	0.837957		13.4873	0.838455
13.5618	0.844775		13.5618	0.838812		13.5618	0.839268		13.5618	0.837909		13.5618	0.838625		13.5618	0.833718		13.5618	0.826438		13.5618	0.826266		13.5618	0.828886		13.5618	0.832552		13.5618	0.841389		13.5618	0.833678		13.5618	0.836429		13.5618	0.83798		13.5618	0.838421		13.5618	0.837614
13.6364	0.845436		13.6364	0.839184		13.6364	0.839056		13.6364	0.836918		13.6364	0.837405		13.6364	0.834417		13.6364	0.827668		13.6364	0.82602		13.6364	0.828067		13.6364	0.832253		13.6364	0.841991		13.6364	0.834244		13.6364	0.836666		13.6364	0.837076		13.6364	0.838391		13.6364	0.835861
13.7109	0.844837		13.7109	0.83739		13.7109	0.840031		13.7109	0.836259		13.7109	0.836806		13.7109	0.834711		13.7109	0.826629		13.7109	0.825322		13.7109	0.827565		13.7109	0.831804		13.7109	0.841563		13.7109	0.834086		13.7109	0.837181		13.7109	0.837198		13.7109	0.838715		13.7109	0.836572
13.7854	0.84428		13.7854	0.838491		13.7854	0.840914		13.7854	0.837795		13.7854	0.836557		13.7854	0.83304		13.7854	0.826729		13.7854	0.824861		13.7854	0.827796		13.7854	0.833945		13.7854	0.842025		13.7854	0.833046		13.7854	0.837309		13.7854	0.836989		13.7854	0.838807		13.7854	0.837459
13.8599	0.844118		13.8599	0.837302		13.8599	0.83925		13.8599	0.837078		13.8599	0.838148		13.8599	0.834105		13.8599	0.826845		13.8599	0.825705		13.8599	0.828335		13.8599	0.832084		13.8599	0.842411		13.8599	0.833291		13.8599	0.837447		13.8599	0.838211		13.8599	0.836851		13.8599	0.837754
13.9344	0.843797		13.9344	0.838264		13.9344	0.838556		13.9344	0.837864		13.9344	0.836755		13.9344	0.834691		13.9344	0.825082		13.9344	0.825276		13.9344	0.827553		13.9344	0.831547		13.9344	0.842512		13.9344	0.833443		13.9344	0.836473		13.9344	0.83774		13.9344	0.83829		13.9344	0.838114
14.0089	0.844479		14.0089	0.838851		14.0089	0.838733		14.0089	0.838761		14.0089	0.837053		14.0089	0.834444		14.0089	0.82718		14.0089	0.825316		14.0089	0.827879		14.0089	0.831645		14.0089	0.842368		14.0089	0.833642		14.0089	0.838347		14.0089	0.837725		14.0089	0.837329		14.0089	0.836578
14.0834	0.844213		14.0834	0.838331		14.0834	0.839625		14.0834	0.835497		14.0834	0.837771		14.0834	0.835069		14.0834	0.824957		14.0834	0.825026		14.0834	0.827023		14.0834	0.831852		14.0834	0.841971		14.0834	0.83294		14.0834	0.837666		14.0834	0.837327		14.0834	0.836556		14.0834	0.836886
14.158	0.844072		14.158	0.837468		14.158	0.83885		14.158	0.83659		14.158	0.83916		14.158	0.833313		14.158	0.826287		14.158	0.824696		14.158	0.826873		14.158	0.831477		14.158	0.842577		14.158	0.833629		14.158	0.836251		14.158	0.837782		14.158	0.837002		14.158	0.836184
14.2325	0.843045		14.2325	0.836969		14.2325	0.84006		14.2325	0.836099		14.2325	0.838089		14.2325	0.834477		14.2325	0.825549		14.2325	0.824746		14.2325	0.827134		14.2325	0.831795		14.2325	0.841014		14.2325	0.833259		14.2325	0.836678		14.2325	0.838459		14.2325	0.837808		14.2325	0.837209
14.307	0.843284		14.307	0.837701		14.307	0.83871		14.307	0.836199		14.307	0.837316		14.307	0.833544		14.307	0.826131		14.307	0.823653		14.307	0.826648		14.307	0.831874		14.307	0.841344		14.307	0.833684		14.307	0.837058		14.307	0.836477		14.307	0.836809		14.307	0.836373
14.3815	0.844806		14.3815	0.837671		14.3815	0.840002		14.3815	0.837012		14.3815	0.837039		14.3815	0.833469		14.3815	0.826178		14.3815	0.82465		14.3815	0.827436		14.3815	0.831878		14.3815	0.840794		14.3815	0.833404		14.3815	0.837566		14.3815	0.836462		14.3815	0.837543		14.3815	0.835779
14.456	0.844861		14.456	0.836567		14.456	0.839999		14.456	0.837105		14.456	0.838083		14.456	0.833601		14.456	0.825567		14.456	0.825276		14.456	0.827223		14.456	0.831655		14.456	0.841138		14.456	0.833195		14.456	0.837613		14.456	0.83698		14.456	0.837038		14.456	0.837468
14.5305	0.844051		14.5305	0.838409		14.5305	0.839027		14.5305	0.836656		14.5305	0.838935		14.5305	0.83382		14.5305	0.824879		14.5305	0.824123		14.5305	0.826614		14.5305	0.830895		14.5305	0.840445		14.5305	0.832351		14.5305	0.837175		14.5305	0.83624		14.5305	0.836449		14.5305	0.835495
14.6051	0.846194		14.6051	0.837005		14.6051	0.839366		14.6051	0.837346		14.6051	0.836676		14.6051	0.833535		14.6051	0.825232		14.6051	0.825244		14.6051	0.827578		14.6051	0.831108		14.6051	0.841605		14.6051	0.833414		14.6051	0.8359		14.6051	0.837737		14.6051	0.83741		14.6051	0.837629
14.6796	0.84333		14.6796	0.837005		14.6796	0.837918		14.6796	0.835672		14.6796	0.837511		14.6796	0.83415		14.6796	0.825946		14.6796	0.825005		14.6796	0.826275		14.6796	0.83079		14.6796	0.841864		14.6796	0.832287		14.6796	0.835216		14.6796	0.836848		14.6796	0.837469		14.6796	0.837382
14.7541	0.844714		14.7541	0.837045		14.7541	0.838803		14.7541	0.835657		14.7541	0.836326		14.7541	0.83412		14.7541	0.824976		14.7541	0.824404		14.7541	0.826836		14.7541	0.831143		14.7541	0.84058		14.7541	0.832248		14.7541	0.836108		14.7541	0.835713		14.7541	0.836315		14.7541	0.835919
14.8286	0.843877		14.8286	0.835562		14.8286	0.837848		14.8286	0.835416		14.8286	0.837639		14.8286	0.833385		14.8286	0.825207		14.8286	0.824021		14.8286	0.826346		14.8286	0.830062		14.8286	0.842445		14.8286	0.833394		14.8286	0.836578		14.8286	0.83542		14.8286	0.837196		14.8286	0.838471
14.9031	0.844931		14.9031	0.837014		14.9031	0.837935		14.9031	0.836271		14.9031	0.836297		14.9031	0.832463		14.9031	0.825733		14.9031	0.825525		14.9031	0.825348		14.9031	0.829903		14.9031	0.840265		14.9031	0.831298		14.9031	0.836219		14.9031	0.835989		14.9031	0.837347		14.9031	0.836605
14.9776	0.844415		14.9776	0.836624		14.9776	0.836901		14.9776	0.835527		14.9776	0.836698		14.9776	0.832505		14.9776	0.826575		14.9776	0.824805		14.9776	0.827011		14.9776	0.830663		14.9776	0.841552		14.9776	0.831169		14.9776	0.836593		14.9776	0.835614		14.9776	0.837294		14.9776	0.836389
15.0522	0.844238		15.0522	0.836318		15.0522	0.838132		15.0522	0.836193		15.0522	0.836465		15.0522	0.832926		15.0522	0.825777		15.0522	0.822684		15.0522	0.825819		15.0522	0.830955		15.0522	0.841617		15.0522	0.831359		15.0522	0.835526		15.0522	0.836962		15.0522	0.83617		15.0522	0.835971
15.1267	0.843018		15.1267	0.838249		15.1267	0.838908		15.1267	0.835497		15.1267	0.83656		15.1267	0.831764		15.1267	0.825045		15.1267	0.823566		15.1267	0.825481		15.1267	0.831213		15.1267	0.840654		15.1267	0.831231		15.1267	0.835345		15.1267	0.836444		15.1267	0.835869		15.1267	0.834916
15.2012	0.842923		15.2012	0.83673		15.2012	0.838402		15.2012	0.835115		15.2012	0.837731		15.2012	0.833295		15.2012	0.82466		15.2012	0.824095		15.2012	0.826303		15.2012	0.831064		15.2012	0.841251		15.2012	0.831327		15.2012	0.835845		15.2012	0.837103		15.2012	0.836428		15.2012	0.837102
15.2757	0.843803		15.2757	0.835308		15.2757	0.837052		15.2757	0.835934		15.2757	0.835405		15.2757	0.832412		15.2757	0.824397		15.2757	0.822977		15.2757	0.82622		15.2757	0.830765		15.2757	0.840259		15.2757	0.831491		15.2757	0.835248		15.2757	0.83771		15.2757	0.836488		15.2757	0.837474
15.3502	0.844604		15.3502	0.837423		15.3502	0.837549		15.3502	0.83578		15.3502	0.836204		15.3502	0.831806		15.3502	0.824012		15.3502	0.822965		15.3502	0.826174		15.3502	0.831054		15.3502	0.840558		15.3502	0.831662		15.3502	0.83552		15.3502	0.83604		15.3502	0.836758		15.3502	0.835852
15.4247	0.84344		15.4247	0.835855		15.4247	0.837122		15.4247	0.835368		15.4247	0.836679		15.4247	0.832734		15.4247	0.824372		15.4247	0.822522		15.4247	0.82424		15.4247	0.83163		15.4247	0.839755		15.4247	0.832499		15.4247	0.835082		15.4247	0.835806		15.4247	0.837338		15.4247	0.835355
15.4992	0.842905		15.4992	0.837825		15.4992	0.838127		15.4992	0.835015		15.4992	0.837237		15.4992	0.832337		15.4992	0.823871		15.4992	0.822681		15.4992	0.825863		15.4992	0.829712		15.4992	0.840009		15.4992	0.831829		15.4992	0.834623		15.4992	0.836462		15.4992	0.8376		15.4992	0.835617
15.5738	0.842471		15.5738	0.836639		15.5738	0.838786		15.5738	0.835467		15.5738	0.835668		15.5738	0.831638		15.5738	0.82296		15.5738	0.822772		15.5738	0.825662		15.5738	0.830548		15.5738	0.840586		15.5738	0.830525		15.5738	0.836368		15.5738	0.836019		15.5738	0.837549		15.5738	0.835099
15.6483	0.843626		15.6483	0.835613		15.6483	0.837912		15.6483	0.83525		15.6483	0.837343		15.6483	0.831071		15.6483	0.824052		15.6483	0.823818		15.6483	0.825444		15.6483	0.829807		15.6483	0.841324		15.6483	0.831897		15.6483	0.834386		15.6483	0.836947		15.6483	0.837543		15.6483	0.83609
15.7228	0.843424		15.7228	0.836639		15.7228	0.837496		15.7228	0.835527		15.7228	0.837408		15.7228	0.832662		15.7228	0.825286		15.7228	0.822865		15.7228	0.825111		15.7228	0.83052		15.7228	0.840727		15.7228	0.83181		15.7228	0.836251		15.7228	0.835447		15.7228	0.835512		15.7228	0.836285
15.7973	0.842963		15.7973	0.836182		15.7973	0.83934		15.7973	0.834184		15.7973	0.836158		15.7973	0.83126		15.7973	0.824685		15.7973	0.822417		15.7973	0.825037		15.7973	0.829566		15.7973	0.84156		15.7973	0.832084		15.7973	0.835143		15.7973	0.836668		15.7973	0.835929		15.7973	0.835462
15.8718	0.844085		15.8718	0.837123		15.8718	0.837386		15.8718	0.835741		15.8718	0.836817		15.8718	0.832043		15.8718	0.824431		15.8718	0.822454		15.8718	0.824449		15.8718	0.831064		15.8718	0.840885		15.8718	0.832064		15.8718	0.834789		15.8718	0.835246		15.8718	0.836301		15.8718	0.835642
15.9463	0.842113		15.9463	0.836657		15.9463	0.836852		15.9463	0.834591		15.9463	0.836858		15.9463	0.83162		15.9463	0.824265		15.9463	0.822357		15.9463	0.823621		15.9463	0.83094		15.9463	0.84073		15.9463	0.831205		15.9463	0.835625		15.9463	0.835105		15.9463	0.836458		15.9463	0.836053
16.0209	0.844124		16.0209	0.836491		16.0209	0.837102		16.0209	0.836226		16.0209	0.836397		16.0209	0.831449		16.0209	0.823933		16.0209	0.823043		16.0209	0.824576		16.0209	0.829769		16.0209	0.842799		16.0209	0.831385		16.0209	0.836353		16.0209	0.834758		16.0209	0.836384		16.0209	0.835779
16.0954	0.843424		16.0954	0.836128		16.0954	0.83707		16.0954	0.834305		16.0954	0.835413		16.0954	0.832292		16.0954	0.824838		16.0954	0.822494		16.0954	0.824517		16.0954	0.830711		16.0954	0.841338		16.0954	0.831018		16.0954	0.83557		16.0954	0.836114		16.0954	0.835453		16.0954	0.835477
16.1699	0.844613		16.1699	0.8362		16.1699	0.83774		16.1699	0.833452		16.1699	0.835849		16.1699	0.832271		16.1699	0.823855		16.1699	0.823267		16.1699	0.826057		16.1699	0.829232		16.1699	0.840935		16.1699	0.830406		16.1699	0.834845		16.1699	0.836339		16.1699	0.836158		16.1699	0.836288
16.2444	0.841829		16.2444	0.836691		16.2444	0.837653		16.2444	0.835422		16.2444	0.836326		16.2444	0.830891		16.2444	0.824134		16.2444	0.821769		16.2444	0.823809		16.2444	0.828898		16.2444	0.840716		16.2444	0.831553		16.2444	0.834319		16.2444	0.834926		16.2444	0.835295		16.2444	0.836529
16.3189	0.843855		16.3189	0.836845		16.3189	0.837331		16.3189	0.835039		16.3189	0.836058		16.3189	0.830564		16.3189	0.823583		16.3189	0.821728		16.3189	0.825376		16.3189	0.829553		16.3189	0.839775		16.3189	0.830741		16.3189	0.834614		16.3189	0.834782		16.3189	0.835581		16.3189	0.836133
16.3934	0.842776		16.3934	0.835819		16.3934	0.837897		16.3934	0.835075		16.3934	0.836934		16.3934	0.831677		16.3934	0.82398		16.3934	0.821962		16.3934	0.823566		16.3934	0.827982		16.3934	0.840932		16.3934	0.830957		16.3934	0.834625		16.3934	0.834494		16.3934	0.8373		16.3934	0.836809
16.4679	0.843675		16.4679	0.836364		16.4679	0.839218		16.4679	0.834666		16.4679	0.836931		16.4679	0.831971		16.4679	0.824193		16.4679	0.822432		16.4679	0.823978		16.4679	0.828717		16.4679	0.839733		16.4679	0.830944		16.4679	0.834602		16.4679	0.836231		16.4679	0.836119		16.4679	0.836953
16.5425	0.844131		16.5425	0.836545		16.5425	0.837909		16.5425	0.834774		16.5425	0.836904		16.5425	0.832866		16.5425	0.82408		16.5425	0.822921		16.5425	0.824776		16.5425	0.830974		16.5425	0.841315		16.5425	0.830641		16.5425	0.834041		16.5425	0.834054		16.5425	0.835278		16.5425	0.836136
16.617	0.843455		16.617	0.836034		16.617	0.836895		16.617	0.833591		16.617	0.83637		16.617	0.832178		16.617	0.823893		16.617	0.821523		16.617	0.825275		16.617	0.828812		16.617	0.839837		16.617	0.831646		16.617	0.835158		16.617	0.833982		16.617	0.834683		16.617	0.835733
16.6915	0.8423		16.6915	0.835286		16.6915	0.836268		16.6915	0.83453		16.6915	0.83708		16.6915	0.831698		16.6915	0.823752		16.6915	0.822541		16.6915	0.824098		16.6915	0.830014		16.6915	0.840434		16.6915	0.831347		16.6915	0.834558		16.6915	0.835123		16.6915	0.836187		16.6915	0.835977
16.766	0.843247		16.766	0.835356		16.766	0.837009		16.766	0.835127		16.766	0.835627		16.766	0.831182		16.766	0.824331		16.766	0.821545		16.766	0.822442		16.766	0.828306		16.766	0.840262		16.766	0.831643		16.766	0.834967		16.766	0.835725		16.766	0.835863		16.766	0.836026
16.8405	0.842819		16.8405	0.836094		16.8405	0.837929		16.8405	0.834461		16.8405	0.836679		16.8405	0.830861		16.8405	0.823774		16.8405	0.82223		16.8405	0.823098		16.8405	0.828672		16.8405	0.84033		16.8405	0.831231		16.8405	0.83445		16.8405	0.836105		16.8405	0.83658		16.8405	0.836825
16.915	0.84189		16.915	0.836185		16.915	0.836614		16.915	0.834404		16.915	0.836213		16.915	0.832572		16.915	0.822725		16.915	0.822498		16.915	0.824557		16.915	0.829372		16.915	0.841268		16.915	0.8302		16.915	0.833745		16.915	0.835132		16.915	0.836348		16.915	0.835428
16.9896	0.8416		16.9896	0.835653		16.9896	0.836808		16.9896	0.834419		16.9896	0.835906		16.9896	0.833145		16.9896	0.824703		16.9896	0.821267		16.9896	0.824363		16.9896	0.830647		16.9896	0.84107		16.9896	0.831939		16.9896	0.833743		16.9896	0.8345		16.9896	0.834757		16.9896	0.836633
17.0641	0.841966		17.0641	0.834681		17.0641	0.83648		17.0641	0.834865		17.0641	0.835687		17.0641	0.832049		17.0641	0.823626		17.0641	0.822971		17.0641	0.823763		17.0641	0.830246		17.0641	0.84013		17.0641	0.831536		17.0641	0.834111		17.0641	0.835324		17.0641	0.836515		17.0641	0.83548
17.1386	0.84277		17.1386	0.836458		17.1386	0.836538		17.1386	0.833672		17.1386	0.836242		17.1386	0.83289		17.1386	0.822712		17.1386	0.821074		17.1386	0.82259		17.1386	0.828723		17.1386	0.840609		17.1386	0.830384		17.1386	0.834488		17.1386	0.836522		17.1386	0.837115		17.1386	0.836791
17.2131	0.844296		17.2131	0.836781		17.2131	0.836785		17.2131	0.832862		17.2131	0.835559		17.2131	0.830696		17.2131	0.822481		17.2131	0.820616		17.2131	0.822617		17.2131	0.828853		17.2131	0.841597		17.2131	0.83011		17.2131	0.835725		17.2131	0.833874		17.2131	0.834927		17.2131	0.837581
17.2876	0.841019		17.2876	0.835946		17.2876	0.837093		17.2876	0.833799		17.2876	0.834667		17.2876	0.831641		17.2876	0.821852		17.2876	0.822784		17.2876	0.823427		17.2876	0.828449		17.2876	0.842059		17.2876	0.83133		17.2876	0.833854		17.2876	0.834476		17.2876	0.835524		17.2876	0.83716
17.3621	0.842997		17.3621	0.83482		17.3621	0.837186		17.3621	0.833585		17.3621	0.835315		17.3621	0.831893		17.3621	0.823245		17.3621	0.820937		17.3621	0.823621		17.3621	0.829114		17.3621	0.840355		17.3621	0.83142		17.3621	0.834336		17.3621	0.834773		17.3621	0.834183		17.3621	0.836209
17.4366	0.842691		17.4366	0.835023		17.4366	0.837479		17.4366	0.83429		17.4366	0.835803		17.4366	0.831707		17.4366	0.823426		17.4366	0.821974		17.4366	0.824496		17.4366	0.828593		17.4366	0.840257		17.4366	0.831231		17.4366	0.834877		17.4366	0.835782		17.4366	0.835358		17.4366	0.835998
17.5112	0.842923		17.5112	0.83443		17.5112	0.83671		17.5112	0.835458		17.5112	0.835364		17.5112	0.83114		17.5112	0.820812		17.5112	0.820738		17.5112	0.824366		17.5112	0.829578		17.5112	0.840347		17.5112	0.830538		17.5112	0.834836		17.5112	0.83583		17.5112	0.834873		17.5112	0.836328
17.5857	0.843538		17.5857	0.835798		17.5857	0.837328		17.5857	0.834467		17.5857	0.835537		17.5857	0.831371		17.5857	0.822446		17.5857	0.820666		17.5857	0.823852		17.5857	0.829769		17.5857	0.839789		17.5857	0.829672		17.5857	0.835032		17.5857	0.835794		17.5857	0.83575		17.5857	0.835727
17.6602	0.841465		17.6602	0.836385		17.6602	0.837325		17.6602	0.834416		17.6602	0.835597		17.6602	0.831365		17.6602	0.823163		17.6602	0.820031		17.6602	0.823156		17.6602	0.828831		17.6602	0.841042		17.6602	0.82918		17.6602	0.835225		17.6602	0.835968		17.6602	0.83573		17.6602	0.836477
17.7347	0.84252		17.7347	0.83466		17.7347	0.837354		17.7347	0.834464		17.7347	0.834879		17.7347	0.831701		17.7347	0.821999		17.7347	0.820258		17.7347	0.824271		17.7347	0.82774		17.7347	0.841017		17.7347	0.831025		17.7347	0.835108		17.7347	0.835785		17.7347	0.836289		17.7347	0.838385
17.8092	0.843036		17.8092	0.836321		17.8092	0.836971		17.8092	0.834548		17.8092	0.835605		17.8092	0.831302		17.8092	0.822797		17.8092	0.82019		17.8092	0.823513		17.8092	0.828023		17.8092	0.84006		17.8092	0.831987		17.8092	0.833816		17.8092	0.835423		17.8092	0.835795		17.8092	0.837898
17.8837	0.842459		17.8837	0.835907		17.8837	0.837186		17.8837	0.834431		17.8837	0.835464		17.8837	0.831428		17.8837	0.824071		17.8837	0.819489		17.8837	0.823335		17.8837	0.827222		17.8837	0.840121		17.8837	0.830438		17.8837	0.833754		17.8837	0.835201		17.8837	0.835816		17.8837	0.836361
17.9583	0.842948		17.9583	0.836542		17.9583	0.837119		17.9583	0.833627		17.9583	0.83496		17.9583	0.831353		17.9583	0.822318		17.9583	0.82062		17.9583	0.823011		17.9583	0.828942		17.9583	0.84053		17.9583	0.829183		17.9583	0.833021		17.9583	0.835339		17.9583	0.835634		17.9583	0.837434
18.0328	0.841193		18.0328	0.834454		18.0328	0.837157		18.0328	0.833883		18.0328	0.835906		18.0328	0.831437		18.0328	0.822841		18.0328	0.820389		18.0328	0.823707		18.0328	0.827899		18.0328	0.841386		18.0328	0.830313		18.0328	0.834468		18.0328	0.835303		18.0328	0.835408		18.0328	0.836136
18.1073	0.842746		18.1073	0.834436		18.1073	0.835795		18.1073	0.83347		18.1073	0.836484		18.1073	0.830621		18.1073	0.822672		18.1073	0.821087		18.1073	0.822611		18.1073	0.829219		18.1073	0.840352		18.1073	0.832502		18.1073	0.833664		18.1073	0.835231		18.1073	0.837478		18.1073	0.83741
18.1818	0.841768		18.1818	0.836107		18.1818	0.837116		18.1818	0.834717		18.1818	0.836456		18.1818	0.830627		18.1818	0.822881		18.1818	0.820215		18.1818	0.823052		18.1818	0.828023		18.1818	0.842329		18.1818	0.829347		18.1818	0.833316		18.1818	0.835626		18.1818	0.836467		18.1818	0.837538
18.2563	0.842098		18.2563	0.836206		18.2563	0.83675		18.2563	0.833943		18.2563	0.834526		18.2563	0.830999		18.2563	0.821648		18.2563	0.820604		18.2563	0.823603		18.2563	0.829016		18.2563	0.839491		18.2563	0.831118		18.2563	0.833795		18.2563	0.835944		18.2563	0.836425		18.2563	0.837919
18.3308	0.842199		18.3308	0.834424		18.3308	0.837668		18.3308	0.834446		18.3308	0.836196		18.3308	0.830122		18.3308	0.822985		18.3308	0.820034		18.3308	0.823683		18.3308	0.828077		18.3308	0.841642		18.3308	0.830242		18.3308	0.83502		18.3308	0.834665		18.3308	0.834951		18.3308	0.837443
18.4054	0.842061		18.4054	0.836149		18.4054	0.837723		18.4054	0.833212		18.4054	0.835036		18.4054	0.831038		18.4054	0.821736		18.4054	0.81961		18.4054	0.823415		18.4054	0.827467		18.4054	0.840304		18.4054	0.829508		18.4054	0.833585		18.4054	0.835626		18.4054	0.834799		18.4054	0.836904
18.4799	0.842535		18.4799	0.833828		18.4799	0.836097		18.4799	0.833428		18.4799	0.835584		18.4799	0.830471		18.4799	0.822039		18.4799	0.819321		18.4799	0.822269		18.4799	0.828112		18.4799	0.839372		18.4799	0.831652		18.4799	0.834047		18.4799	0.834863		18.4799	0.835001		18.4799	0.8368
18.5544	0.842165		18.5544	0.835628		18.5544	0.836187		18.5544	0.833242		18.5544	0.836367		18.5544	0.831677		18.5544	0.82291		18.5544	0.820632		18.5544	0.824234		18.5544	0.829582		18.5544	0.841194		18.5544	0.83201		18.5544	0.833088		18.5544	0.835099		18.5544	0.835878		18.5544	0.836895
18.6289	0.841661		18.6289	0.835005		18.6289	0.836611		18.6289	0.834961		18.6289	0.836286		18.6289	0.83102		18.6289	0.821723		18.6289	0.81957		18.6289	0.82279		18.6289	0.826999		18.6289	0.840735		18.6289	0.828758		18.6289	0.834085		18.6289	0.834911		18.6289	0.835554		18.6289	0.836739
18.7034	0.843024		18.7034	0.83482		18.7034	0.836715		18.7034	0.834479		18.7034	0.836326		18.7034	0.830525		18.7034	0.822337		18.7034	0.819997		18.7034	0.822987		18.7034	0.828491		18.7034	0.839969		18.7034	0.829646		18.7034	0.834108		18.7034	0.835306		18.7034	0.836033		18.7034	0.836812
18.7779	0.842266		18.7779	0.835786		18.7779	0.836588		18.7779	0.833585		18.7779	0.835581		18.7779	0.830218		18.7779	0.821316		18.7779	0.821401		18.7779	0.822272		18.7779	0.829712		18.7779	0.83982		18.7779	0.831053		18.7779	0.833006		18.7779	0.83568		18.7779	0.835135		18.7779	0.836572
18.8524	0.841835		18.8524	0.834055		18.8524	0.83709		18.8524	0.83338		18.8524	0.836023		18.8524	0.830422		18.8524	0.8225		18.8524	0.82085		18.8524	0.823987		18.8524	0.828227		18.8524	0.840459		18.8524	0.830339		18.8524	0.834014		18.8524	0.835264		18.8524	0.835566		18.8524	0.837831
18.927	0.840918		18.927	0.835559		18.927	0.835798		18.927	0.833401		18.927	0.835665		18.927	0.82954		18.927	0.822381		18.927	0.819838		18.927	0.824141		18.927	0.827689		18.927	0.84129		18.927	0.829698		18.927	0.834602		18.927	0.835012		18.927	0.835661		18.927	0.83727
19.0015	0.841866		19.0015	0.83564		19.0015	0.83693		19.0015	0.834898		19.0015	0.836058		19.0015	0.829402		19.0015	0.82394		19.0015	0.819573		19.0015	0.821641		19.0015	0.829664		19.0015	0.840496		19.0015	0.829556		19.0015	0.833371		19.0015	0.834437		19.0015	0.834332		19.0015	0.836809
19.076	0.842471		19.076	0.835065		19.076	0.837096		19.076	0.833606		19.076	0.834998		19.076	0.830642		19.076	0.821488		19.076	0.820165		19.076	0.823692		19.076	0.828535		19.076	0.841113		19.076	0.830429		19.076	0.832366		19.076	0.836483		19.076	0.835316		19.076	0.838233
19.1505	0.841551		19.1505	0.834627		19.1505	0.837749		19.1505	0.833732		19.1505	0.835814		19.1505	0.830422		19.1505	0.821157		19.1505	0.820461		19.1505	0.823686		19.1505	0.829334		19.1505	0.840383		19.1505	0.832254		19.1505	0.834234		19.1505	0.835587		19.1505	0.835278		19.1505	0.837998
19.225	0.841734		19.225	0.834739		19.225	0.83675		19.225	0.833449		19.225	0.835556		19.225	0.831308		19.225	0.822521		19.225	0.819638		19.225	0.82307		19.225	0.827181		19.225	0.840138		19.225	0.830851		19.225	0.833196		19.225	0.835815		19.225	0.836268		19.225	0.838059
19.2995	0.840661		19.2995	0.835404		19.2995	0.837041		19.2995	0.833269		19.2995	0.834843		19.2995	0.829282		19.2995	0.82142		19.2995	0.820018		19.2995	0.823285		19.2995	0.829353		19.2995	0.840459		19.2995	0.828619		19.2995	0.834631		19.2995	0.834818		19.2995	0.835849		19.2995	0.838196
19.3741	0.842367		19.3741	0.835961		19.3741	0.836495		19.3741	0.833239		19.3741	0.835386		19.3741	0.830281		19.3741	0.822183		19.3741	0.818393		19.3741	0.823637		19.3741	0.827457		19.3741	0.840195		19.3741	0.829598		19.3741	0.835064		19.3741	0.835812		19.3741	0.835575		19.3741	0.838062
19.4486	0.84219		19.4486	0.834049		19.4486	0.835499		19.4486	0.832748		19.4486	0.834746		19.4486	0.830302		19.4486	0.821235		19.4486	0.81933		19.4486	0.821632		19.4486	0.828698		19.4486	0.840806		19.4486	0.829505		19.4486	0.833903		19.4486	0.835123		19.4486	0.836967		19.4486	0.838385
19.5231	0.842248		19.5231	0.836836		19.5231	0.836622		19.5231	0.835193		19.5231	0.834827		19.5231	0.831032		19.5231	0.82182		19.5231	0.819333		19.5231	0.822408		19.5231	0.827689		19.5231	0.840595		19.5231	0.830686		19.5231	0.833529		19.5231	0.836132		19.5231	0.835102		19.5231	0.837602
19.5976	0.840637		19.5976	0.835314		19.5976	0.836683		19.5976	0.832323		19.5976	0.836004		19.5976	0.83177		19.5976	0.822424		19.5976	0.821432		19.5976	0.822276		19.5976	0.827349		19.5976	0.840566		19.5976	0.830593		19.5976	0.833781		19.5976	0.834737		19.5976	0.836672		19.5976	0.837504
19.6721	0.841208		19.6721	0.83482		19.6721	0.837595		19.6721	0.834106		19.6721	0.834944		19.6721	0.830368		19.6721	0.821285		19.6721	0.818595		19.6721	0.822189		19.6721	0.827632		19.6721	0.840761		19.6721	0.830777		19.6721	0.833339		19.6721	0.834114		19.6721	0.836024		19.6721	0.836675
19.7466	0.841939		19.7466	0.835274		19.7466	0.836936		19.7466	0.834979		19.7466	0.836006		19.7466	0.830795		19.7466	0.822631		19.7466	0.819772		19.7466	0.822987		19.7466	0.829346		19.7466	0.841445		19.7466	0.830191		19.7466	0.833512		19.7466	0.83536		19.7466	0.836048		19.7466	0.83687
19.8211	0.843999		19.8211	0.834887		19.8211	0.836178		19.8211	0.833817		19.8211	0.835182		19.8211	0.831536		19.8211	0.822324		19.8211	0.818773		19.8211	0.822368		19.8211	0.828376		19.8211	0.840296		19.8211	0.829353		19.8211	0.83326		19.8211	0.83459		19.8211	0.836518		19.8211	0.837693
19.8957	0.842394		19.8957	0.835786		19.8957	0.83709		19.8957	0.834874		19.8957	0.834607		19.8957	0.831845		19.8957	0.822196		19.8957	0.819797		19.8957	0.822848		19.8957	0.827744		19.8957	0.840296		19.8957	0.829466		19.8957	0.83386		19.8957	0.835986		19.8957	0.83606		19.8957	0.836544
19.9702	0.84056		19.9702	0.834303		19.9702	0.837494		19.9702	0.833717		19.9702	0.83615		19.9702	0.830966		19.9702	0.821097		19.9702	0.818751		19.9702	0.82283		19.9702	0.829175		19.9702	0.841211		19.9702	0.830938		19.9702	0.835418		19.9702	0.834749		19.9702	0.835747		19.9702	0.837504
20.0447	0.841924		20.0447	0.835507		20.0447	0.836765		20.0447	0.835033		20.0447	0.835432		20.0447	0.831254		20.0447	0.819748		20.0447	0.818078		20.0447	0.822011		20.0447	0.826847		20.0447	0.839724		20.0447	0.830129		20.0447	0.833751		20.0447	0.83595		20.0447	0.836119		20.0447	0.836529
20.1192	0.842987		20.1192	0.834905		20.1192	0.836498		20.1192	0.835253		20.1192	0.835597		20.1192	0.830681		20.1192	0.821388		20.1192	0.819417		20.1192	0.822934		20.1192	0.827321		20.1192	0.840583		20.1192	0.830986		20.1192	0.833836		20.1192	0.835228		20.1192	0.835337		20.1192	0.837815
20.1937	0.842541		20.1937	0.835247		20.1937	0.836756		20.1937	0.83425		20.1937	0.834659		20.1937	0.831392		20.1937	0.821013		20.1937	0.818617		20.1937	0.822356		20.1937	0.828755		20.1937	0.841251		20.1937	0.829782		20.1937	0.833965		20.1937	0.835527		20.1937	0.836714		20.1937	0.83751
20.2682	0.841771		20.2682	0.834784		20.2682	0.837467		20.2682	0.83332		20.2682	0.83522		20.2682	0.830479		20.2682	0.8209		20.2682	0.819564		20.2682	0.82251		20.2682	0.826818		20.2682	0.840079		20.2682	0.829997		20.2682	0.833652		20.2682	0.83604		20.2682	0.835893		20.2682	0.837041
20.3428	0.841805		20.3428	0.83509		20.3428	0.83648		20.3428	0.834308		20.3428	0.834849		20.3428	0.830657		20.3428	0.820797		20.3428	0.818122		20.3428	0.822956		20.3428	0.828189		20.3428	0.8414		20.3428	0.831218		20.3428	0.834441		20.3428	0.834467		20.3428	0.836298		20.3428	0.838928
20.4173	0.843091		20.4173	0.835081		20.4173	0.8368		20.4173	0.834588		20.4173	0.835882		20.4173	0.829828		20.4173	0.82208		20.4173	0.818676		20.4173	0.823107		20.4173	0.82691		20.4173	0.840941		20.4173	0.831169		20.4173	0.834093		20.4173	0.835261		20.4173	0.837216		20.4173	0.837148
20.4918	0.84148		20.4918	0.835477		20.4918	0.836977		20.4918	0.833064		20.4918	0.835323		20.4918	0.830119		20.4918	0.820687		20.4918	0.820012		20.4918	0.822125		20.4918	0.826192		20.4918	0.840521		20.4918	0.828413		20.4918	0.834064		20.4918	0.836285		20.4918	0.836675		20.4918	0.838434
20.5663	0.84263		20.5663	0.834545		20.5663	0.838312		20.5663	0.834371		20.5663	0.835033		20.5663	0.830933		20.5663	0.82197		20.5663	0.819352		20.5663	0.822331		20.5663	0.828259		20.5663	0.840437		20.5663	0.829949		20.5663	0.832769		20.5663	0.834159		20.5663	0.835563		20.5663	0.836739
20.6408	0.843311		20.6408	0.834539		20.6408	0.836373		20.6408	0.833799		20.6408	0.834952		20.6408	0.830239		20.6408	0.820865		20.6408	0.819909		20.6408	0.821998		20.6408	0.827187		20.6408	0.839598		20.6408	0.828333		20.6408	0.834275		20.6408	0.835237		20.6408	0.835982		20.6408	0.837331
20.7153	0.841792		20.7153	0.83758		20.7153	0.835897		20.7153	0.833699		20.7153	0.835556		20.7153	0.831047		20.7153	0.820596		20.7153	0.819209		20.7153	0.821278		20.7153	0.827658		20.7153	0.840789		20.7153	0.829801		20.7153	0.834541		20.7153	0.833946		20.7153	0.835816		20.7153	0.837361
20.7899	0.841853		20.7899	0.834981		20.7899	0.837703		20.7899	0.832829		20.7899	0.835415		20.7899	0.831257		20.7899	0.820333		20.7899	0.819807		20.7899	0.822236		20.7899	0.827298		20.7899	0.8416		20.7899	0.828523		20.7899	0.833658		20.7899	0.836381		20.7899	0.835792		20.7899	0.836511
20.8644	0.842132		20.8644	0.835786		20.8644	0.836245		20.8644	0.834262		20.8644	0.83541		20.8644	0.831329		20.8644	0.821094		20.8644	0.819869		20.8644	0.82267		20.8644	0.828036		20.8644	0.840493		20.8644	0.830355		20.8644	0.834102		20.8644	0.835282		20.8644	0.836529		20.8644	0.836489
20.9389	0.842556		20.9389	0.835386		20.9389	0.836954		20.9389	0.833787		20.9389	0.835535		20.9389	0.830311		20.9389	0.821175		20.9389	0.819676		20.9389	0.821617		20.9389	0.826904		20.9389	0.83962		20.9389	0.830835		20.9389	0.833205		20.9389	0.834991		20.9389	0.836821		20.9389	0.837007
21.0134	0.84634		21.0134	0.838633		21.0134	0.841228		21.0134	0.838216		21.0134	0.839981		21.0134	0.836611		21.0134	0.82686		21.0134	0.823784		21.0134	0.82699		21.0134	0.833522		21.0134	0.844182		21.0134	0.835471		21.0134	0.838572		21.0134	0.840924		21.0134	0.841611		21.0134	0.841059
21.0879	0.860908		21.0879	0.85418		21.0879	0.855182		21.0879	0.852278		21.0879	0.855638		21.0879	0.851724		21.0879	0.840331		21.0879	0.838789		21.0879	0.84131		21.0879	0.847078		21.0879	0.859855		21.0879	0.850652		21.0879	0.852812		21.0879	0.855612		21.0879	0.855287		21.0879	0.856182
21.1624	0.869133		21.1624	0.861458		21.1624	0.864595		21.1624	0.861134		21.1624	0.863433		21.1624	0.859864		21.1624	0.848718		21.1624	0.846615		21.1624	0.848179		21.1624	0.856943		21.1624	0.868693		21.1624	0.857909		21.1624	0.860399		21.1624	0.862706		21.1624	0.863646		21.1624	0.864873
21.2369	0.874314		21.2369	0.868406		21.2369	0.8697		21.2369	0.866867		21.2369	0.867524		21.2369	0.862484		21.2369	0.854728		21.2369	0.850496		21.2369	0.853817		21.2369	0.861799		21.2369	0.873469		21.2369	0.862648		21.2369	0.865956		21.2369	0.867578		21.2369	0.868992		21.2369	0.869312
21.3115	0.878756		21.3115	0.872583		21.3115	0.875585		21.3115	0.870424		21.3115	0.871998		21.3115	0.868652		21.3115	0.857608		21.3115	0.855884		21.3115	0.857819		21.3115	0.864747		21.3115	0.878045		21.3115	0.868244		21.3115	0.870838		21.3115	0.872947		21.3115	0.872676		21.3115	0.875113
21.386	0.882463		21.386	0.876435		21.386	0.878245		21.386	0.874127		21.386	0.876705		21.386	0.870915		21.386	0.861922		21.386	0.860275		21.386	0.862552		21.386	0.870605		21.386	0.881807		21.386	0.871605		21.386	0.875478		21.386	0.877436		21.386	0.876578		21.386	0.878265
21.4605	0.886073		21.4605	0.878786		21.4605	0.880989		21.4605	0.877879		21.4605	0.879801		21.4605	0.875858		21.4605	0.86597		21.4605	0.863383		21.4605	0.865394		21.4605	0.873305		21.4605	0.886036		21.4605	0.875733		21.4605	0.87808		21.4605	0.879994		21.4605	0.881184		21.4605	0.882807
21.535	0.889478		21.535	0.882708		21.535	0.884273		21.535	0.880321		21.535	0.883114		21.535	0.877944		21.535	0.870124		21.535	0.867933		21.535	0.870409		21.535	0.876885		21.535	0.88777		21.535	0.878747		21.535	0.881172		21.535	0.884456		21.535	0.883503		21.535	0.88562
21.6095	0.892544		21.6095	0.884322		21.6095	0.885689		21.6095	0.883332		21.6095	0.885768		21.6095	0.881489		21.6095	0.872741		21.6095	0.8703		21.6095	0.873208		21.6095	0.878259		21.6095	0.890761		21.6095	0.881673		21.6095	0.883541		21.6095	0.885579		21.6095	0.886953		21.6095	0.889794
21.684	0.895188		21.684	0.888504		21.684	0.889394		21.684	0.88522		21.684	0.888257		21.684	0.88431		21.684	0.874804		21.684	0.87131		21.684	0.874729		21.684	0.880666		21.684	0.89336		21.684	0.884033		21.684	0.886628		21.684	0.888259		21.684	0.890453		21.684	0.891836
21.7586	0.897019		21.7586	0.88884		21.7586	0.89186		21.7586	0.887656		21.7586	0.889461		21.7586	0.885991		21.7586	0.877024		21.7586	0.875131		21.7586	0.877171		21.7586	0.885465		21.7586	0.897029		21.7586	0.886442		21.7586	0.89001		21.7586	0.892765		21.7586	0.892927		21.7586	0.894244

## Sheet: 1b
	Dose Response Curve	Dose Response Curve	Dose Response Curve
	Ligand Concentration [M]	Fnorm [‰]	Error Value
	0.0001	877.215	0
	5e-05	875.527	0
	2.5e-05	876.206	0
	1.25e-05	875.921	0
	6.25e-06	876.688	0
	3.125e-06	874.413	0
	1.5625e-06	870.586	0
	7.8125e-07	869.612	0
	3.90625e-07	869.928	0
	1.95313e-07	872.278	0
	9.76563e-08	875.965	0
	4.88281e-08	872.858	0
	2.44141e-08	873.859	0
	1.2207e-08	873.526	0
	6.10352e-09	874.035	0
	3.05176e-09	873.313	0

## Sheet: 1c
Sample Information	Sample Information		Sample Information	Sample Information		Sample Information	Sample Information		Sample Information	Sample Information		Sample Information	Sample Information		Sample Information	Sample Information		Sample Information	Sample Information		Sample Information	Sample Information		Sample Information	Sample Information		Sample Information	Sample Information		Sample Information	Sample Information		Sample Information	Sample Information		Sample Information	Sample Information		Sample Information	Sample Information		Sample Information	Sample Information		Sample Information	Sample Information
Merge-Set Name:	Experiment 2 (#02)		Merge-Set Name:	Experiment 2 (#02)		Merge-Set Name:	Experiment 2 (#02)		Merge-Set Name:	Experiment 2 (#02)		Merge-Set Name:	Experiment 2 (#02)		Merge-Set Name:	Experiment 2 (#02)		Merge-Set Name:	Experiment 2 (#02)		Merge-Set Name:	Experiment 2 (#02)		Merge-Set Name:	Experiment 2 (#02)		Merge-Set Name:	Experiment 2 (#02)		Merge-Set Name:	Experiment 2 (#02)		Merge-Set Name:	Experiment 2 (#02)		Merge-Set Name:	Experiment 2 (#02)		Merge-Set Name:	Experiment 2 (#02)		Merge-Set Name:	Experiment 2 (#02)		Merge-Set Name:	Experiment 2 (#02)
Run Name:	Experiment 2 (#02)		Run Name:	Experiment 2 (#02)		Run Name:	Experiment 2 (#02)		Run Name:	Experiment 2 (#02)		Run Name:	Experiment 2 (#02)		Run Name:	Experiment 2 (#02)		Run Name:	Experiment 2 (#02)		Run Name:	Experiment 2 (#02)		Run Name:	Experiment 2 (#02)		Run Name:	Experiment 2 (#02)		Run Name:	Experiment 2 (#02)		Run Name:	Experiment 2 (#02)		Run Name:	Experiment 2 (#02)		Run Name:	Experiment 2 (#02)		Run Name:	Experiment 2 (#02)		Run Name:	Experiment 2 (#02)
Date of Measurement:	2022-11-23 10:55:09		Date of Measurement:	2022-11-23 10:55:49		Date of Measurement:	2022-11-23 10:56:29		Date of Measurement:	2022-11-23 10:57:10		Date of Measurement:	2022-11-23 10:57:50		Date of Measurement:	2022-11-23 10:58:31		Date of Measurement:	2022-11-23 10:59:11		Date of Measurement:	2022-11-23 10:59:52		Date of Measurement:	2022-11-23 11:00:32		Date of Measurement:	2022-11-23 11:01:13		Date of Measurement:	2022-11-23 11:01:53		Date of Measurement:	2022-11-23 11:02:34		Date of Measurement:	2022-11-23 11:03:14		Date of Measurement:	2022-11-23 11:03:54		Date of Measurement:	2022-11-23 11:04:35		Date of Measurement:	2022-11-23 11:05:15
Capillary Type:	Monolith NT.115 Premium Capillary		Capillary Type:	Monolith NT.115 Premium Capillary		Capillary Type:	Monolith NT.115 Premium Capillary		Capillary Type:	Monolith NT.115 Premium Capillary		Capillary Type:	Monolith NT.115 Premium Capillary		Capillary Type:	Monolith NT.115 Premium Capillary		Capillary Type:	Monolith NT.115 Premium Capillary		Capillary Type:	Monolith NT.115 Premium Capillary		Capillary Type:	Monolith NT.115 Premium Capillary		Capillary Type:	Monolith NT.115 Premium Capillary		Capillary Type:	Monolith NT.115 Premium Capillary		Capillary Type:	Monolith NT.115 Premium Capillary		Capillary Type:	Monolith NT.115 Premium Capillary		Capillary Type:	Monolith NT.115 Premium Capillary		Capillary Type:	Monolith NT.115 Premium Capillary		Capillary Type:	Monolith NT.115 Premium Capillary
Capillary Position:	1		Capillary Position:	2		Capillary Position:	3		Capillary Position:	4		Capillary Position:	5		Capillary Position:	6		Capillary Position:	7		Capillary Position:	8		Capillary Position:	9		Capillary Position:	10		Capillary Position:	11		Capillary Position:	12		Capillary Position:	13		Capillary Position:	14		Capillary Position:	15		Capillary Position:	16
Ligand:	cGMP		Ligand:	cGMP		Ligand:	cGMP		Ligand:	cGMP		Ligand:	cGMP		Ligand:	cGMP		Ligand:	cGMP		Ligand:	cGMP		Ligand:	cGMP		Ligand:	cGMP		Ligand:	cGMP		Ligand:	cGMP		Ligand:	cGMP		Ligand:	cGMP		Ligand:	cGMP		Ligand:	cGMP
Ligand Concentration:	0.0001		Ligand Concentration:	5e-05		Ligand Concentration:	2.5e-05		Ligand Concentration:	1.25e-05		Ligand Concentration:	6.25e-06		Ligand Concentration:	3.125e-06		Ligand Concentration:	1.5625e-06		Ligand Concentration:	7.8125e-07		Ligand Concentration:	3.90625e-07		Ligand Concentration:	1.95313e-07		Ligand Concentration:	9.76563e-08		Ligand Concentration:	4.88281e-08		Ligand Concentration:	2.44141e-08		Ligand Concentration:	1.2207e-08		Ligand Concentration:	6.10352e-09		Ligand Concentration:	3.05176e-09
Target:	CNBD		Target:	CNBD		Target:	CNBD		Target:	CNBD		Target:	CNBD		Target:	CNBD		Target:	CNBD		Target:	CNBD		Target:	CNBD		Target:	CNBD		Target:	CNBD		Target:	CNBD		Target:	CNBD		Target:	CNBD		Target:	CNBD		Target:	CNBD
TargetConcentration:	5e-08		TargetConcentration:	5e-08		TargetConcentration:	5e-08		TargetConcentration:	5e-08		TargetConcentration:	5e-08		TargetConcentration:	5e-08		TargetConcentration:	5e-08		TargetConcentration:	5e-08		TargetConcentration:	5e-08		TargetConcentration:	5e-08		TargetConcentration:	5e-08		TargetConcentration:	5e-08		TargetConcentration:	5e-08		TargetConcentration:	5e-08		TargetConcentration:	5e-08		TargetConcentration:	5e-08
Measurement Settings	Measurement Settings		Measurement Settings	Measurement Settings		Measurement Settings	Measurement Settings		Measurement Settings	Measurement Settings		Measurement Settings	Measurement Settings		Measurement Settings	Measurement Settings		Measurement Settings	Measurement Settings		Measurement Settings	Measurement Settings		Measurement Settings	Measurement Settings		Measurement Settings	Measurement Settings		Measurement Settings	Measurement Settings		Measurement Settings	Measurement Settings		Measurement Settings	Measurement Settings		Measurement Settings	Measurement Settings		Measurement Settings	Measurement Settings		Measurement Settings	Measurement Settings
MST-Power:	Medium		MST-Power:	Medium		MST-Power:	Medium		MST-Power:	Medium		MST-Power:	Medium		MST-Power:	Medium		MST-Power:	Medium		MST-Power:	Medium		MST-Power:	Medium		MST-Power:	Medium		MST-Power:	Medium		MST-Power:	Medium		MST-Power:	Medium		MST-Power:	Medium		MST-Power:	Medium		MST-Power:	Medium
Excitation-Power:	60		Excitation-Power:	60		Excitation-Power:	60		Excitation-Power:	60		Excitation-Power:	60		Excitation-Power:	60		Excitation-Power:	60		Excitation-Power:	60		Excitation-Power:	60		Excitation-Power:	60		Excitation-Power:	60		Excitation-Power:	60		Excitation-Power:	60		Excitation-Power:	60		Excitation-Power:	60		Excitation-Power:	60
Excitation type:	Nano - RED		Excitation type:	Nano - RED		Excitation type:	Nano - RED		Excitation type:	Nano - RED		Excitation type:	Nano - RED		Excitation type:	Nano - RED		Excitation type:	Nano - RED		Excitation type:	Nano - RED		Excitation type:	Nano - RED		Excitation type:	Nano - RED		Excitation type:	Nano - RED		Excitation type:	Nano - RED		Excitation type:	Nano - RED		Excitation type:	Nano - RED		Excitation type:	Nano - RED		Excitation type:	Nano - RED
Thermostat Setpoint:	25		Thermostat Setpoint:	25		Thermostat Setpoint:	25		Thermostat Setpoint:	25		Thermostat Setpoint:	25		Thermostat Setpoint:	25		Thermostat Setpoint:	25		Thermostat Setpoint:	25		Thermostat Setpoint:	25		Thermostat Setpoint:	25		Thermostat Setpoint:	25		Thermostat Setpoint:	25		Thermostat Setpoint:	25		Thermostat Setpoint:	25		Thermostat Setpoint:	25		Thermostat Setpoint:	25
Included	Included		Included	Included		Included	Included		Included	Included		Included	Included		Included	Included		Included	Included		Included	Included		Included	Included		Included	Included		Included	Included		Included	Included		Included	Included		Included	Included		Included	Included		Included	Included
Time [s]	Normalized Fluorescence [-]		Time [s]	Normalized Fluorescence [-]		Time [s]	Normalized Fluorescence [-]		Time [s]	Normalized Fluorescence [-]		Time [s]	Normalized Fluorescence [-]		Time [s]	Normalized Fluorescence [-]		Time [s]	Normalized Fluorescence [-]		Time [s]	Normalized Fluorescence [-]		Time [s]	Normalized Fluorescence [-]		Time [s]	Normalized Fluorescence [-]		Time [s]	Normalized Fluorescence [-]		Time [s]	Normalized Fluorescence [-]		Time [s]	Normalized Fluorescence [-]		Time [s]	Normalized Fluorescence [-]		Time [s]	Normalized Fluorescence [-]		Time [s]	Normalized Fluorescence [-]
-3.57675	0.998991		-3.57675	1.00194		-3.57675	0.999764		-3.57675	0.999745		-3.57675	1.00128		-3.57675	1.00028		-3.57675	0.99949		-3.57675	0.999155		-3.57675	1.00013		-3.57675	0.999106		-3.57675	1.0003		-3.57675	0.999706		-3.57675	0.999779		-3.57675	1.00027		-3.57675	0.999984		-3.57675	1.00056
-3.50223	1.00131		-3.50223	0.999348		-3.50223	0.999553		-3.50223	0.999215		-3.50223	0.999854		-3.50223	0.999922		-3.50223	1.00019		-3.50223	1.00071		-3.50223	0.999718		-3.50223	1.00002		-3.50223	0.999382		-3.50223	1.00083		-3.50223	0.997697		-3.50223	1.00031		-3.50223	1.00013		-3.50223	1.00052
-3.42772	0.999875		-3.42772	0.999853		-3.42772	0.999542		-3.42772	1.00002		-3.42772	0.999442		-3.42772	0.999218		-3.42772	1.00002		-3.42772	0.999517		-3.42772	0.999035		-3.42772	1.00098		-3.42772	0.999414		-3.42772	0.999882		-3.42772	0.999381		-3.42772	0.997734		-3.42772	0.999448		-3.42772	1.0005
-3.3532	1.0004		-3.3532	0.999983		-3.3532	0.999849		-3.3532	0.999647		-3.3532	0.999639		-3.3532	0.999239		-3.3532	0.999383		-3.3532	0.999957		-3.3532	1.00106		-3.3532	0.998806		-3.3532	1.00106		-3.3532	0.999843		-3.3532	0.999748		-3.3532	0.999506		-3.3532	0.99935		-3.3532	0.999497
-3.27869	0.999159		-3.27869	0.999303		-3.27869	1.00071		-3.27869	0.999356		-3.27869	0.998624		-3.27869	0.999901		-3.27869	1.0002		-3.27869	0.999639		-3.27869	0.999184		-3.27869	0.999723		-3.27869	1.00022		-3.27869	0.999725		-3.27869	1.00013		-3.27869	0.999826		-3.27869	1.00063		-3.27869	0.999682
-3.20417	0.998744		-3.20417	0.999838		-3.20417	0.999043		-3.20417	0.999913		-3.20417	0.999645		-3.20417	0.999073		-3.20417	0.999113		-3.20417	0.999916		-3.20417	1.00059		-3.20417	1.0005		-3.20417	1.00148		-3.20417	0.999535		-3.20417	1.00001		-3.20417	1.00025		-3.20417	0.999521		-3.20417	1.00092
-3.12966	0.999763		-3.12966	1.00047		-3.12966	0.998466		-3.12966	1.00106		-3.12966	0.999114		-3.12966	0.999848		-3.12966	0.99919		-3.12966	0.99867		-3.12966	1.00059		-3.12966	0.998548		-3.12966	1.00027		-3.12966	0.999355		-3.12966	1.00166		-3.12966	0.999884		-3.12966	1.00001		-3.12966	1.00009
-3.05514	1.00057		-3.05514	0.999788		-3.05514	1.00113		-3.05514	1.00009		-3.05514	0.99994		-3.05514	0.999286		-3.05514	1.00049		-3.05514	0.999353		-3.05514	0.999725		-3.05514	1.00028		-3.05514	0.999404		-3.05514	0.998304		-3.05514	0.999845		-3.05514	0.999736		-3.05514	0.99949		-3.05514	0.999398
-2.98062	1.00099		-2.98062	1.00046		-2.98062	1.00175		-2.98062	1.00081		-2.98062	1.0008		-2.98062	1.00083		-2.98062	0.998917		-2.98062	0.999155		-2.98062	0.999155		-2.98062	0.998634		-2.98062	0.999639		-2.98062	1.00112		-2.98062	0.999012		-2.98062	0.999318		-2.98062	0.999198		-2.98062	1.00034
-2.90611	0.999134		-2.90611	1.00061		-2.90611	1.00007		-2.90611	1.00128		-2.90611	0.999788		-2.90611	1.00023		-2.90611	0.999945		-2.90611	1.00108		-2.90611	1.0001		-2.90611	0.999774		-2.90611	1.00046		-2.90611	0.999899		-2.90611	1.00088		-2.90611	0.999185		-2.90611	0.998884		-2.90611	0.999166
-2.83159	1.00001		-2.83159	1.00005		-2.83159	1.00057		-2.83159	1.00001		-2.83159	1.00001		-2.83159	0.999972		-2.83159	0.999321		-2.83159	1.00113		-2.83159	0.998905		-2.83159	0.998819		-2.83159	0.999702		-2.83159	1.00012		-2.83159	0.999893		-2.83159	1.00045		-2.83159	1.0001		-2.83159	0.999386
-2.75708	0.998926		-2.75708	0.999236		-2.75708	1.00083		-2.75708	0.999734		-2.75708	1.0002		-2.75708	0.99889		-2.75708	0.999686		-2.75708	0.999712		-2.75708	0.999148		-2.75708	1.0006		-2.75708	0.998907		-2.75708	1.00289		-2.75708	1.00009		-2.75708	0.99989		-2.75708	0.999901		-2.75708	1.00081
-2.68256	0.998896		-2.68256	1.00069		-2.68256	0.999623		-2.68256	1.00045		-2.68256	0.999743		-2.68256	0.999458		-2.68256	1.00027		-2.68256	1.00015		-2.68256	0.998503		-2.68256	1.00087		-2.68256	1.00106		-2.68256	1.00092		-2.68256	1		-2.68256	1.00046		-2.68256	1.00003		-2.68256	1.00052
-2.60805	1.00005		-2.60805	1.00009		-2.60805	0.999978		-2.60805	0.999647		-2.60805	1.00029		-2.60805	1.00025		-2.60805	1.00053		-2.60805	1.00038		-2.60805	1.00001		-2.60805	0.999988		-2.60805	0.999004		-2.60805	1.00023		-2.60805	1.00049		-2.60805	1.00144		-2.60805	0.999246		-2.60805	0.999549
-2.53353	0.999901		-2.53353	0.998818		-2.53353	0.998637		-2.53353	0.999033		-2.53353	0.999421		-2.53353	1.00034		-2.53353	0.999627		-2.53353	1.00104		-2.53353	0.998905		-2.53353	0.999988		-2.53353	1.00042		-2.53353	0.999113		-2.53353	1.0003		-2.53353	1.00057		-2.53353	0.999518		-2.53353	0.998551
-2.45901	1.00045		-2.45901	0.999368		-2.45901	1.00075		-2.45901	1.00048		-2.45901	0.999084		-2.45901	0.998796		-2.45901	0.999063		-2.45901	1.00078		-2.45901	0.999855		-2.45901	0.999411		-2.45901	0.999495		-2.45901	0.99984		-2.45901	0.999271		-2.45901	0.999624		-2.45901	1.0012		-2.45901	0.99923
-2.3845	0.999117		-2.3845	0.999666		-2.3845	0.998778		-2.3845	0.999399		-2.3845	1.00046		-2.3845	1.00096		-2.3845	0.999835		-2.3845	0.999505		-2.3845	1.00074		-2.3845	1.00038		-2.3845	1.00051		-2.3845	0.998314		-2.3845	1.0012		-2.3845	0.998953		-2.3845	0.999591		-2.3845	1.00052
-2.30998	1.00111		-2.30998	0.999521		-2.30998	0.999807		-2.30998	1.00017		-2.30998	0.999696		-2.30998	1.00008		-2.30998	0.999603		-2.30998	0.999776		-2.30998	1.00097		-2.30998	1.00002		-2.30998	0.998972		-2.30998	0.997944		-2.30998	1.00083		-2.30998	1.00022		-2.30998	1.00027		-2.30998	0.999143
-2.23547	1.00033		-2.23547	0.999976		-2.23547	0.999223		-2.23547	1		-2.23547	0.999513		-2.23547	1.00155		-2.23547	1		-2.23547	0.999686		-2.23547	0.999145		-2.23547	1.00027		-2.23547	0.99958		-2.23547	0.999702		-2.23547	0.999157		-2.23547	1.00074		-2.23547	0.999372		-2.23547	1.00048
-2.16095	0.999457		-2.16095	0.999076		-2.16095	0.99997		-2.16095	0.999985		-2.16095	0.999152		-2.16095	0.999413		-2.16095	1.00044		-2.16095	0.999648		-2.16095	1.00025		-2.16095	0.999625		-2.16095	1.00077		-2.16095	0.9993		-2.16095	0.998714		-2.16095	0.999143		-2.16095	0.999879		-2.16095	0.999781
-2.08644	0.999445		-2.08644	1.0005		-2.08644	0.999432		-2.08644	0.997946		-2.08644	0.999325		-2.08644	1.00071		-2.08644	0.999677		-2.08644	0.9987		-2.08644	0.999119		-2.08644	1.0007		-2.08644	0.999326		-2.08644	0.999823		-2.08644	1.0002		-2.08644	0.999639		-2.08644	1.00105		-2.08644	0.999967
-2.01192	0.999981		-2.01192	0.999073		-2.01192	0.999412		-2.01192	0.999408		-2.01192	0.999687		-2.01192	0.999673		-2.01192	1.00051		-2.01192	1.00018		-2.01192	0.998947		-2.01192	1.00103		-2.01192	1.00026		-2.01192	0.99962		-2.01192	1.00082		-2.01192	0.999869		-2.01192	0.999654		-2.01192	1.00004
-1.93741	0.999057		-1.93741	0.999308		-1.93741	0.998871		-1.93741	0.998947		-1.93741	0.999448		-1.93741	1.00016		-1.93741	0.999511		-1.93741	1.0002		-1.93741	0.999858		-1.93741	0.998383		-1.93741	0.999054		-1.93741	1.00088		-1.93741	0.999438		-1.93741	0.999261		-1.93741	0.999825		-1.93741	0.999409
-1.86289	1.00111		-1.86289	0.999553		-1.86289	0.998522		-1.86289	1.00094		-1.86289	1.00027		-1.86289	0.99861		-1.86289	0.99925		-1.86289	1.00006		-1.86289	0.999501		-1.86289	0.999545		-1.86289	1.00107		-1.86289	0.999493		-1.86289	1.00007		-1.86289	0.998342		-1.86289	0.997364		-1.86289	0.999093
-1.78837	0.998834		-1.78837	0.999588		-1.78837	0.999026		-1.78837	1.00006		-1.78837	1.00027		-1.78837	1.00046		-1.78837	0.998822		-1.78837	0.998119		-1.78837	0.997609		-1.78837	0.998246		-1.78837	0.998619		-1.78837	0.999814		-1.78837	0.99988		-1.78837	0.999479		-1.78837	0.999832		-1.78837	0.999099
-1.71386	0.999562		-1.71386	0.998928		-1.71386	1.00102		-1.71386	0.999766		-1.71386	0.999642		-1.71386	0.999038		-1.71386	0.999942		-1.71386	0.999134		-1.71386	1.0001		-1.71386	0.999618		-1.71386	1.00088		-1.71386	1.00078		-1.71386	0.998901		-1.71386	0.999723		-1.71386	0.998983		-1.71386	0.998559
-1.63934	0.998961		-1.63934	1.00055		-1.63934	0.999753		-1.63934	0.999362		-1.63934	0.999018		-1.63934	0.998976		-1.63934	1.00043		-1.63934	0.998367		-1.63934	0.998986		-1.63934	0.998937		-1.63934	0.998957		-1.63934	0.999486		-1.63934	1.00035		-1.63934	0.999536		-1.63934	1.00088		-1.63934	1.00065
-1.56483	0.999412		-1.56483	0.999583		-1.56483	0.999466		-1.56483	0.999679		-1.56483	0.998794		-1.56483	0.998855		-1.56483	1.00029		-1.56483	0.998641		-1.56483	0.999051		-1.56483	0.998727		-1.56483	1.00005		-1.56483	1.00046		-1.56483	0.999586		-1.56483	0.999754		-1.56483	0.999144		-1.56483	0.998388
-1.49031	1.00009		-1.49031	0.998961		-1.49031	0.998452		-1.49031	1.00003		-1.49031	0.999627		-1.49031	0.99772		-1.49031	0.999428		-1.49031	0.9998		-1.49031	0.998798		-1.49031	0.999682		-1.49031	0.999611		-1.49031	0.999178		-1.49031	0.998269		-1.49031	0.999896		-1.49031	0.998362		-1.49031	0.999705
-1.4158	0.998558		-1.4158	0.998821		-1.4158	0.998494		-1.4158	1.00098		-1.4158	0.998663		-1.4158	1.00062		-1.4158	0.999743		-1.4158	1.00073		-1.4158	0.998941		-1.4158	0.999303		-1.4158	1.00072		-1.4158	1.0002		-1.4158	0.999005		-1.4158	0.999781		-1.4158	0.998764		-1.4158	1.00162
-1.34128	0.999901		-1.34128	0.999346		-1.34128	0.999345		-1.34128	0.999065		-1.34128	1.00051		-1.34128	0.999957		-1.34128	0.999618		-1.34128	1.00061		-1.34128	0.99895		-1.34128	1.00051		-1.34128	0.999736		-1.34128	1.00026		-1.34128	1.00038		-1.34128	1.00004		-1.34128	1.00003		-1.34128	0.999552
-1.26677	0.998446		-1.26677	1.0001		-1.26677	0.998728		-1.26677	0.99824		-1.26677	0.99957		-1.26677	0.997794		-1.26677	0.999342		-1.26677	0.99877		-1.26677	0.999096		-1.26677	0.99866		-1.26677	0.999889		-1.26677	1.00116		-1.26677	1.00007		-1.26677	1.00023		-1.26677	1		-1.26677	1.00077
-1.19225	0.998719		-1.19225	0.999073		-1.19225	1.00022		-1.19225	1.0003		-1.19225	0.998272		-1.19225	0.998911		-1.19225	0.998881		-1.19225	0.999377		-1.19225	0.999291		-1.19225	0.999402		-1.19225	0.999936		-1.19225	0.999686		-1.19225	1.00061		-1.19225	0.999527		-1.19225	0.999531		-1.19225	0.998446
-1.11773	0.999029		-1.11773	1.00001		-1.11773	0.998933		-1.11773	0.999365		-1.11773	1.00003		-1.11773	0.999189		-1.11773	0.999544		-1.11773	0.998831		-1.11773	0.997988		-1.11773	0.999121		-1.11773	0.999498		-1.11773	1.0012		-1.11773	0.99874		-1.11773	0.998656		-1.11773	0.998393		-1.11773	0.999604
-1.04322	1.00056		-1.04322	0.999673		-1.04322	1.00026		-1.04322	1.00121		-1.04322	0.999627		-1.04322	0.999224		-1.04322	0.999282		-1.04322	1.00035		-1.04322	0.999787		-1.04322	0.999348		-1.04322	0.999041		-1.04322	1.00021		-1.04322	0.998955		-1.04322	0.999826		-1.04322	0.999905		-1.04322	0.99905
-0.968703	0.999685		-0.968703	0.999528		-0.968703	1.00004		-0.968703	1.00111		-0.968703	0.999167		-0.968703	1.00011		-0.968703	1.00019		-0.968703	0.999969		-0.968703	0.997959		-0.968703	1.0002		-0.968703	1.00008		-0.968703	0.998926		-0.968703	0.99995		-0.968703	1.00017		-0.968703	0.999236		-0.968703	0.999668
-0.894187	1.00021		-0.894187	1.00023		-0.894187	0.999207		-0.894187	0.999466		-0.894187	0.998415		-0.894187	1.00059		-0.894187	0.998875		-0.894187	0.999108		-0.894187	0.997943		-0.894187	0.998602		-0.894187	0.999404		-0.894187	0.99833		-0.894187	1.00044		-0.894187	0.998944		-0.894187	0.999813		-0.894187	1.00156
-0.819672	0.999207		-0.819672	0.999723		-0.819672	0.999739		-0.819672	0.999321		-0.819672	1.00048		-0.819672	1.00015		-0.819672	0.999844		-0.819672	0.99966		-0.819672	0.999096		-0.819672	0.998367		-0.819672	0.999611		-0.819672	0.999656		-0.819672	1.0003		-0.819672	0.999164		-0.819672	0.998149		-0.819672	1.00076
-0.745156	0.999522		-0.745156	0.999848		-0.745156	1.00065		-0.745156	0.999448		-0.745156	0.998985		-0.745156	0.998542		-0.745156	0.999496		-0.745156	1.00011		-0.745156	0.998789		-0.745156	0.998644		-0.745156	0.999382		-0.745156	1.00058		-0.745156	1.00034		-0.745156	0.999554		-0.745156	0.999141		-0.745156	0.998884
-0.67064	0.998774		-0.67064	1.00006		-0.67064	0.998232		-0.67064	0.999027		-0.67064	0.99894		-0.67064	0.999434		-0.67064	1.0005		-0.67064	0.998668		-0.67064	0.998364		-0.67064	0.998956		-0.67064	0.998847		-0.67064	0.999981		-0.67064	0.999912		-0.67064	1.00004		-0.67064	0.998682		-0.67064	1.00028
-0.596125	0.999137		-0.596125	0.999896		-0.596125	0.999753		-0.596125	1.00062		-0.596125	0.998976		-0.596125	0.998849		-0.596125	0.998703		-0.596125	0.999193		-0.596125	0.998973		-0.596125	0.999233		-0.596125	0.999151		-0.596125	0.999879		-0.596125	0.997757		-0.596125	0.998333		-0.596125	0.99794		-0.596125	0.99851
-0.521609	0.998636		-0.521609	1.00017		-0.521609	0.999592		-0.521609	0.999823		-0.521609	0.998558		-0.521609	0.999242		-0.521609	0.99919		-0.521609	0.999639		-0.521609	0.99988		-0.521609	0.999373		-0.521609	1.00018		-0.521609	1.00055		-0.521609	0.998594		-0.521609	0.999479		-0.521609	1.00039		-0.521609	0.997538
-0.447094	0.999703		-0.447094	1.00082		-0.447094	0.999083		-0.447094	1.00032		-0.447094	0.998669		-0.447094	0.99975		-0.447094	0.99761		-0.447094	0.999385		-0.447094	0.998649		-0.447094	0.999765		-0.447094	0.999523		-0.447094	1.00056		-0.447094	0.9988		-0.447094	0.998363		-0.447094	0.999753		-0.447094	1.00002
-0.372578	0.999024		-0.372578	1.00026		-0.372578	0.998866		-0.372578	0.999368		-0.372578	0.99914		-0.372578	0.999079		-0.372578	0.999383		-0.372578	0.999321		-0.372578	0.999576		-0.372578	0.999739		-0.372578	0.99978		-0.372578	0.999368		-0.372578	1.00091		-0.372578	0.999152		-0.372578	0.999746		-0.372578	0.999125
-0.298063	0.999197		-0.298063	0.999378		-0.298063	0.999384		-0.298063	0.999261		-0.298063	0.998827		-0.298063	0.998344		-0.298063	0.999069		-0.298063	0.999587		-0.298063	0.998789		-0.298063	0.999637		-0.298063	1.00086		-0.298063	0.998805		-0.298063	1.00091		-0.298063	1.00002		-0.298063	0.998279		-0.298063	0.998841
-0.223547	0.999172		-0.223547	1.00025		-0.223547	0.998694		-0.223547	1.00086		-0.223547	0.999412		-0.223547	0.999271		-0.223547	0.998623		-0.223547	0.999225		-0.223547	0.999287		-0.223547	0.998198		-0.223547	1.00082		-0.223547	0.999935		-0.223547	0.998993		-0.223547	0.998853		-0.223547	0.999943		-0.223547	1.00051
-0.149031	0.99943		-0.149031	0.999688		-0.149031	0.999598		-0.149031	0.998788		-0.149031	0.999794		-0.149031	0.999322		-0.149031	0.998189		-0.149031	1.00081		-0.149031	0.999148		-0.149031	0.999297		-0.149031	1.00071		-0.149031	0.999908		-0.149031	0.999409		-0.149031	0.999267		-0.149031	0.999458		-0.149031	1.00074
-0.0745156	0.99965		-0.0745156	0.998636		-0.0745156	0.999632		-0.0745156	0.999846		-0.0745156	0.99917		-0.0745156	0.99881		-0.0745156	1.0006		-0.0745156	0.999169		-0.0745156	0.998014		-0.0745156	0.999112		-0.0745156	1.00015		-0.0745156	0.999807		-0.0745156	1.00014		-0.0745156	0.999433		-0.0745156	0.998739		-0.0745156	1.00038
0	0.998375		0	0.998211		0	0.998525		0	0.998823		0	0.998519		0	0.998864		0	0.997432		0	0.997635		0	0.997337		0	0.997434		0	0.999495		0	0.998199		0	0.997776		0	0.998136		0	0.997006		0	0.999288
0.0745156	0.980427		0.0745156	0.980455		0.0745156	0.981218		0.0745156	0.980532		0.0745156	0.982396		0.0745156	0.981208		0.0745156	0.980297		0.0745156	0.981496		0.0745156	0.980825		0.0745156	0.980958		0.0745156	0.980433		0.0745156	0.980797		0.0745156	0.981949		0.0745156	0.980584		0.0745156	0.981434		0.0745156	0.981127
0.149031	0.969593		0.149031	0.971332		0.149031	0.969826		0.149031	0.970573		0.149031	0.971949		0.149031	0.969961		0.149031	0.968698		0.149031	0.970194		0.149031	0.969261		0.149031	0.969128		0.149031	0.969681		0.149031	0.971852		0.149031	0.97158		0.149031	0.971397		0.149031	0.968232		0.149031	0.971102
0.223547	0.963415		0.223547	0.963219		0.223547	0.963713		0.223547	0.962879		0.223547	0.96409		0.223547	0.960999		0.223547	0.964172		0.223547	0.96337		0.223547	0.963374		0.223547	0.963868		0.223547	0.964044		0.223547	0.964076		0.223547	0.964207		0.223547	0.963627		0.223547	0.964104		0.223547	0.963674
0.298062	0.95742		0.298062	0.957596		0.298062	0.957961		0.298062	0.958309		0.298062	0.95735		0.298062	0.957964		0.298062	0.957236		0.298062	0.958492		0.298062	0.958202		0.298062	0.958779		0.298062	0.957493		0.298062	0.959479		0.298062	0.958653		0.298062	0.956631		0.298062	0.95836		0.298062	0.958729
0.372578	0.953268		0.372578	0.953796		0.372578	0.953071		0.372578	0.95354		0.372578	0.953482		0.372578	0.952507		0.372578	0.95418		0.372578	0.953932		0.372578	0.953738		0.372578	0.955633		0.372578	0.9541		0.372578	0.95262		0.372578	0.954632		0.372578	0.953587		0.372578	0.95465		0.372578	0.954261
0.447093	0.950207		0.447093	0.949828		0.447093	0.949085		0.447093	0.947897		0.447093	0.949649		0.447093	0.950163		0.447093	0.949784		0.447093	0.949413		0.447093	0.949172		0.447093	0.950376		0.447093	0.950081		0.447093	0.950361		0.447093	0.951504		0.447093	0.950017		0.447093	0.950893		0.447093	0.95086
0.521609	0.946406		0.521609	0.946788		0.521609	0.945736		0.521609	0.946469		0.521609	0.946244		0.521609	0.944821		0.521609	0.945985		0.521609	0.946256		0.521609	0.945281		0.521609	0.945488		0.521609	0.946873		0.521609	0.947106		0.521609	0.946497		0.521609	0.947456		0.521609	0.947284		0.521609	0.946862
0.596125	0.943749		0.596125	0.943215		0.596125	0.942403		0.596125	0.943843		0.596125	0.942805		0.596125	0.942927		0.596125	0.94382		0.596125	0.942288		0.596125	0.94254		0.596125	0.943204		0.596125	0.943696		0.596125	0.943708		0.596125	0.944171		0.596125	0.943432		0.596125	0.944594		0.596125	0.943307
0.67064	0.938592		0.67064	0.940765		0.67064	0.938845		0.67064	0.940368		0.67064	0.940641		0.67064	0.93946		0.67064	0.939127		0.67064	0.941588		0.67064	0.940006		0.67064	0.939533		0.67064	0.940979		0.67064	0.940971		0.67064	0.940425		0.67064	0.939832		0.67064	0.941854		0.67064	0.940989
0.745156	0.937265		0.745156	0.937625		0.745156	0.937817		0.745156	0.936888		0.745156	0.937125		0.745156	0.937617		0.745156	0.938307		0.745156	0.936477		0.745156	0.938583		0.745156	0.938199		0.745156	0.939035		0.745156	0.940286		0.745156	0.937739		0.745156	0.938517		0.745156	0.93708		0.745156	0.938679
0.819672	0.933519		0.819672	0.935347		0.819672	0.935443		0.819672	0.933837		0.819672	0.934797		0.819672	0.934588		0.819672	0.933496		0.819672	0.936112		0.819672	0.934572		0.819672	0.935696		0.819672	0.933805		0.819672	0.935329		0.819672	0.935373		0.819672	0.934423		0.819672	0.936208		0.819672	0.935003
0.894187	0.930822		0.894187	0.93261		0.894187	0.931947		0.894187	0.932879		0.894187	0.932349		0.894187	0.931562		0.894187	0.931954		0.894187	0.933069		0.894187	0.933244		0.894187	0.931999		0.894187	0.933191		0.894187	0.932441		0.894187	0.9332		0.894187	0.931851		0.894187	0.932454		0.894187	0.932986
0.968703	0.93006		0.968703	0.931159		0.968703	0.929161		0.968703	0.930627		0.968703	0.930887		0.968703	0.928976		0.968703	0.929308		0.968703	0.930493		0.968703	0.929135		0.968703	0.930286		0.968703	0.929395		0.968703	0.930398		0.968703	0.931547		0.968703	0.931923		0.968703	0.931234		0.968703	0.931147
1.04322	0.927491		1.04322	0.927789		1.04322	0.92893		1.04322	0.927127		1.04322	0.927976		1.04322	0.925596		1.04322	0.92681		1.04322	0.929073		1.04322	0.927123		1.04322	0.927149		1.04322	0.926468		1.04322	0.930182		1.04322	0.92933		1.04322	0.928259		1.04322	0.929279		1.04322	0.929035
1.11773	0.926051		1.11773	0.925442		1.11773	0.925457		1.11773	0.926631		1.11773	0.927406		1.11773	0.924169		1.11773	0.925886		1.11773	0.92654		1.11773	0.925539		1.11773	0.925242		1.11773	0.926709		1.11773	0.926862		1.11773	0.927813		1.11773	0.925173		1.11773	0.925924		1.11773	0.92774
1.19225	0.923028		1.19225	0.924277		1.19225	0.924854		1.19225	0.924823		1.19225	0.923824		1.19225	0.923625		1.19225	0.924107		1.19225	0.92444		1.19225	0.924421		1.19225	0.924624		1.19225	0.923591		1.19225	0.925788		1.19225	0.925036		1.19225	0.923703		1.19225	0.925012		1.19225	0.924911
1.26677	0.920897		1.26677	0.921919		1.26677	0.920772		1.26677	0.921833		1.26677	0.922195		1.26677	0.920717		1.26677	0.921143		1.26677	0.921732		1.26677	0.921492		1.26677	0.921325		1.26677	0.92289		1.26677	0.923038		1.26677	0.924149		1.26677	0.921696		1.26677	0.922519		1.26677	0.923426
1.34128	0.918312		1.34128	0.921001		1.34128	0.921054		1.34128	0.919855		1.34128	0.920488		1.34128	0.919993		1.34128	0.920216		1.34128	0.920475		1.34128	0.920173		1.34128	0.921229		1.34128	0.921864		1.34128	0.920628		1.34128	0.920528		1.34128	0.919701		1.34128	0.9207		1.34128	0.921554
1.4158	0.918671		1.4158	0.917081		1.4158	0.918096		1.4158	0.916934		1.4158	0.9181		1.4158	0.918209		1.4158	0.918458		1.4158	0.918377		1.4158	0.916349		1.4158	0.917265		1.4158	0.919172		1.4158	0.918543		1.4158	0.918181		1.4158	0.918144		1.4158	0.919696		1.4158	0.9212
1.49031	0.916279		1.49031	0.916286		1.49031	0.917268		1.49031	0.916487		1.49031	0.917234		1.49031	0.916066		1.49031	0.916114		1.49031	0.917129		1.49031	0.91748		1.49031	0.915708		1.49031	0.917472		1.49031	0.916974		1.49031	0.919182		1.49031	0.916662		1.49031	0.917348		1.49031	0.918586
1.56483	0.913291		1.56483	0.915024		1.56483	0.914023		1.56483	0.914021		1.56483	0.913622		1.56483	0.914219		1.56483	0.915422		1.56483	0.916329		1.56483	0.914723		1.56483	0.915319		1.56483	0.916258		1.56483	0.915056		1.56483	0.916993		1.56483	0.915393		1.56483	0.915976		1.56483	0.916201
1.63934	0.912425		1.63934	0.913403		1.63934	0.914668		1.63934	0.913854		1.63934	0.911614		1.63934	0.912899		1.63934	0.912526		1.63934	0.912828		1.63934	0.914068		1.63934	0.914249		1.63934	0.914092		1.63934	0.912639		1.63934	0.91439		1.63934	0.912046		1.63934	0.914608		1.63934	0.913679
1.71386	0.910379		1.71386	0.910668		1.71386	0.911383		1.71386	0.911812		1.71386	0.911085		1.71386	0.909976		1.71386	0.91241		1.71386	0.913167		1.71386	0.912724		1.71386	0.912638		1.71386	0.912073		1.71386	0.911349		1.71386	0.913101		1.71386	0.91207		1.71386	0.912222		1.71386	0.91435
1.78837	0.909973		1.78837	0.909106		1.78837	0.909282		1.78837	0.910033		1.78837	0.909485		1.78837	0.908641		1.78837	0.910328		1.78837	0.909923		1.78837	0.90972		1.78837	0.910989		1.78837	0.910117		1.78837	0.911988		1.78837	0.911265		1.78837	0.910486		1.78837	0.910258		1.78837	0.911494
1.86289	0.907662		1.86289	0.908311		1.86289	0.908397		1.86289	0.908828		1.86289	0.908408		1.86289	0.907308		1.86289	0.908098		1.86289	0.90987		1.86289	0.909309		1.86289	0.908721		1.86289	0.909052		1.86289	0.911942		1.86289	0.910495		1.86289	0.909615		1.86289	0.908531		1.86289	0.90987
1.93741	0.907106		1.93741	0.907476		1.93741	0.906197		1.93741	0.907977		1.93741	0.906366		1.93741	0.907435		1.93741	0.907833		1.93741	0.907735		1.93741	0.905748		1.93741	0.908247		1.93741	0.90806		1.93741	0.909074		1.93741	0.907961		1.93741	0.906632		1.93741	0.908487		1.93741	0.907923
2.01192	0.903958		2.01192	0.906603		2.01192	0.905524		2.01192	0.906042		2.01192	0.906557		2.01192	0.904705		2.01192	0.904278		2.01192	0.905587		2.01192	0.905981		2.01192	0.90626		2.01192	0.907209		2.01192	0.907319		2.01192	0.906552		2.01192	0.90632		2.01192	0.906906		2.01192	0.906898
2.08644	0.903968		2.08644	0.903745		2.08644	0.905006		2.08644	0.90407		2.08644	0.90431		2.08644	0.90185		2.08644	0.904655		2.08644	0.90393		2.08644	0.905275		2.08644	0.904496		2.08644	0.904761		2.08644	0.906589		2.08644	0.905686		2.08644	0.904957		2.08644	0.904938		2.08644	0.904676
2.16095	0.902067		2.16095	0.9027		2.16095	0.902687		2.16095	0.90277		2.16095	0.902979		2.16095	0.902196		2.16095	0.902478		2.16095	0.904461		2.16095	0.903032		2.16095	0.902894		2.16095	0.904489		2.16095	0.903318		2.16095	0.905601		2.16095	0.903412		2.16095	0.905534		2.16095	0.905511
2.23547	0.900537		2.23547	0.90225		2.23547	0.903245		2.23547	0.90138		2.23547	0.902734		2.23547	0.901534		2.23547	0.902451		2.23547	0.903709		2.23547	0.901817		2.23547	0.902235		2.23547	0.902958		2.23547	0.902653		2.23547	0.904439		2.23547	0.902819		2.23547	0.904232		2.23547	0.904728
2.30998	0.899906		2.30998	0.900713		2.30998	0.901045		2.30998	0.900359		2.30998	0.900516		2.30998	0.899557		2.30998	0.900981		2.30998	0.899939		2.30998	0.901195		2.30998	0.898901		2.30998	0.902958		2.30998	0.902237		2.30998	0.902063		2.30998	0.902538		2.30998	0.902708		2.30998	0.902195
2.3845	0.898498		2.3845	0.899878		2.3845	0.899659		2.3845	0.898952		2.3845	0.900325		2.3845	0.8987		2.3845	0.899077		2.3845	0.89888		2.3845	0.900188		2.3845	0.900515		2.3845	0.900695		2.3845	0.900744		2.3845	0.899577		2.3845	0.899261		2.3845	0.902439		2.3845	0.901382
2.45901	0.897236		2.45901	0.897623		2.45901	0.899377		2.45901	0.897248		2.45901	0.898439		2.45901	0.897861		2.45901	0.896802		2.45901	0.898192		2.45901	0.896863		2.45901	0.898751		2.45901	0.900232		2.45901	0.899274		2.45901	0.899476		2.45901	0.897979		2.45901	0.900709		2.45901	0.898965
2.53353	0.896229		2.53353	0.89717		2.53353	0.897428		2.53353	0.897493		2.53353	0.8956		2.53353	0.896014		2.53353	0.89684		2.53353	0.896462		2.53353	0.895775		2.53353	0.897375		2.53353	0.898589		2.53353	0.898148		2.53353	0.897188		2.53353	0.897323		2.53353	0.898317		2.53353	0.898817
2.60805	0.895734		2.60805	0.895902		2.60805	0.896144		2.60805	0.895941		2.60805	0.895863		2.60805	0.895051		2.60805	0.895198		2.60805	0.897424		2.60805	0.895159		2.60805	0.896194		2.60805	0.897587		2.60805	0.897647		2.60805	0.89716		2.60805	0.897187		2.60805	0.897059		2.60805	0.898086
2.68256	0.894466		2.68256	0.894447		2.68256	0.895442		2.68256	0.89281		2.68256	0.894842		2.68256	0.894797		2.68256	0.895596		2.68256	0.894192		2.68256	0.894349		2.68256	0.894717		2.68256	0.896266		2.68256	0.896524		2.68256	0.896702		2.68256	0.894512		2.68256	0.896416		2.68256	0.89607
2.75708	0.892821		2.75708	0.892785		2.75708	0.894087		2.75708	0.89433		2.75708	0.893424		2.75708	0.893106		2.75708	0.893446		2.75708	0.894962		2.75708	0.893973		2.75708	0.893223		2.75708	0.894648		2.75708	0.896007		2.75708	0.897397		2.75708	0.8955		2.75708	0.894711		2.75708	0.896006
2.83159	0.892102		2.83159	0.892175		2.83159	0.892544		2.83159	0.89144		2.83159	0.89249		2.83159	0.89277		2.83159	0.892174		2.83159	0.894011		2.83159	0.893218		2.83159	0.89279		2.83159	0.894009		2.83159	0.895234		2.83159	0.894102		2.83159	0.893248		2.83159	0.894227		2.83159	0.894903
2.90611	0.889876		2.90611	0.891495		2.90611	0.891079		2.90611	0.89159		2.90611	0.889971		2.90611	0.890731		2.90611	0.891506		2.90611	0.89159		2.90611	0.892133		2.90611	0.892494		2.90611	0.892494		2.90611	0.892133		2.90611	0.892096		2.90611	0.893224		2.90611	0.892924		2.90611	0.893217
2.98062	0.890615		2.98062	0.889947		2.98062	0.890335		2.98062	0.889543		2.98062	0.889816		2.98062	0.889422		2.98062	0.890728		2.98062	0.891461		2.98062	0.890837		2.98062	0.891465		2.98062	0.891975		2.98062	0.892114		2.98062	0.893593		2.98062	0.891504		2.98062	0.892392		2.98062	0.892739
3.05514	0.888093		3.05514	0.88912		3.05514	0.889853		3.05514	0.888557		3.05514	0.888031		3.05514	0.889847		3.05514	0.888506		3.05514	0.890201		3.05514	0.888636		3.05514	0.889854		3.05514	0.890006		3.05514	0.890974		3.05514	0.892797		3.05514	0.890131		3.05514	0.89123		3.05514	0.891488
3.12966	0.88812		3.12966	0.888304		3.12966	0.887944		3.12966	0.887565		3.12966	0.887332		3.12966	0.888494		3.12966	0.888607		3.12966	0.889078		3.12966	0.88852		3.12966	0.889179		3.12966	0.888986		3.12966	0.890483		3.12966	0.891464		3.12966	0.889115		3.12966	0.889547		3.12966	0.891369
3.20417	0.886703		3.20417	0.886414		3.20417	0.888152		3.20417	0.886994		3.20417	0.887625		3.20417	0.886272		3.20417	0.887571		3.20417	0.888424		3.20417	0.888053		3.20417	0.887323		3.20417	0.889192		3.20417	0.889196		3.20417	0.889761		3.20417	0.887495		3.20417	0.890818		3.20417	0.890249
3.27869	0.885954		3.27869	0.885854		3.27869	0.886862		3.27869	0.887152		3.27869	0.885389		3.27869	0.88657		3.27869	0.888289		3.27869	0.886878		3.27869	0.886802		3.27869	0.887023		3.27869	0.887439		3.27869	0.886927		3.27869	0.887471		3.27869	0.887679		3.27869	0.889582		3.27869	0.889274
3.3532	0.884702		3.3532	0.885884		3.3532	0.884222		3.3532	0.885169		3.3532	0.885553		3.3532	0.886121		3.3532	0.886573		3.3532	0.886834		3.3532	0.888193		3.3532	0.887151		3.3532	0.888234		3.3532	0.88807		3.3532	0.887866		3.3532	0.885832		3.3532	0.888423		3.3532	0.887789
3.42772	0.884529		3.42772	0.884129		3.42772	0.883625		3.42772	0.882902		3.42772	0.88412		3.42772	0.884162		3.42772	0.885203		3.42772	0.885591		3.42772	0.884826		3.42772	0.884781		3.42772	0.885593		3.42772	0.885245		3.42772	0.886927		3.42772	0.885433		3.42772	0.88707		3.42772	0.886129
3.50223	0.883933		3.50223	0.882872		3.50223	0.883344		3.50223	0.883649		3.50223	0.883529		3.50223	0.8822		3.50223	0.883745		3.50223	0.886181		3.50223	0.88493		3.50223	0.883759		3.50223	0.88609		3.50223	0.885094		3.50223	0.886406		3.50223	0.884877		3.50223	0.884871		3.50223	0.887234
3.57675	0.882243		3.57675	0.880491		3.57675	0.880735		3.57675	0.882859		3.57675	0.88432		3.57675	0.881479		3.57675	0.883902		3.57675	0.884526		3.57675	0.883935		3.57675	0.884288		3.57675	0.883727		3.57675	0.88496		3.57675	0.884596		3.57675	0.885297		3.57675	0.885201		3.57675	0.885705
3.65126	0.880916		3.65126	0.880464		3.65126	0.881648		3.65126	0.881443		3.65126	0.880369		3.65126	0.882421		3.65126	0.882705		3.65126	0.88343		3.65126	0.88308		3.65126	0.883492		3.65126	0.883142		3.65126	0.883313		3.65126	0.884438		3.65126	0.882821		3.65126	0.884294		3.65126	0.883152
3.72578	0.88081		3.72578	0.880169		3.72578	0.880946		3.72578	0.880523		3.72578	0.881825		3.72578	0.880941		3.72578	0.881779		3.72578	0.88352		3.72578	0.882458		3.72578	0.882807		3.72578	0.882363		3.72578	0.882838		3.72578	0.883443		3.72578	0.882951		3.72578	0.88341		3.72578	0.885316
3.8003	0.878952		3.8003	0.881091		3.8003	0.879631		3.8003	0.880203		3.8003	0.880198		3.8003	0.878979		3.8003	0.880825		3.8003	0.881953		3.8003	0.883012		3.8003	0.881186		3.8003	0.88174		3.8003	0.882691		3.8003	0.883932		3.8003	0.881612		3.8003	0.882872		3.8003	0.8826
3.87481	0.878289		3.87481	0.877381		3.87481	0.878042		3.87481	0.878343		3.87481	0.878252		3.87481	0.87962		3.87481	0.880769		3.87481	0.88123		3.87481	0.880371		3.87481	0.881151		3.87481	0.882719		3.87481	0.880317		3.87481	0.880887		3.87481	0.880865		3.87481	0.881212		3.87481	0.881988
3.94933	0.878008		3.94933	0.877619		3.94933	0.877938		3.94933	0.877308		3.94933	0.878109		3.94933	0.876958		3.94933	0.880365		3.94933	0.880398		3.94933	0.88028		3.94933	0.879015		3.94933	0.880328		3.94933	0.88108		3.94933	0.881866		3.94933	0.880345		3.94933	0.881516		3.94933	0.882313
4.02384	0.877647		4.02384	0.875956		4.02384	0.877127		4.02384	0.876582		4.02384	0.87856		4.02384	0.877185		4.02384	0.878589		4.02384	0.879669		4.02384	0.878916		4.02384	0.87825		4.02384	0.879323		4.02384	0.878356		4.02384	0.88155		4.02384	0.87939		4.02384	0.880147		4.02384	0.879545
4.09836	0.875739		4.09836	0.875871		4.09836	0.87707		4.09836	0.876582		4.09836	0.877494		4.09836	0.878007		4.09836	0.879566		4.09836	0.877989		4.09836	0.878145		4.09836	0.878798		4.09836	0.878547		4.09836	0.879272		4.09836	0.878635		4.09836	0.878187		4.09836	0.879156		4.09836	0.87884
4.17287	0.875847		4.17287	0.875566		4.17287	0.875673		4.17287	0.875316		4.17287	0.8771		4.17287	0.876189		4.17287	0.876706		4.17287	0.877405		4.17287	0.877542		4.17287	0.876977		4.17287	0.878913		4.17287	0.878909		4.17287	0.878644		4.17287	0.878181		4.17287	0.878417		4.17287	0.879423
4.24739	0.873438		4.24739	0.874769		4.24739	0.874977		4.24739	0.87266		4.24739	0.876088		4.24739	0.875684		4.24739	0.877154		4.24739	0.876594		4.24739	0.876982		4.24739	0.877664		4.24739	0.878581		4.24739	0.877171		4.24739	0.879345		4.24739	0.877591		4.24739	0.878398		4.24739	0.878608
4.3219	0.873751		4.3219	0.874191		4.3219	0.873608		4.3219	0.873952		4.3219	0.874882		4.3219	0.874939		4.3219	0.876429		4.3219	0.876276		4.3219	0.876039		4.3219	0.876397		4.3219	0.876437		4.3219	0.876011		4.3219	0.875851		4.3219	0.876802		4.3219	0.877891		4.3219	0.878083
4.39642	0.873152		4.39642	0.872343		4.39642	0.873439		4.39642	0.874451		4.39642	0.87519		4.39642	0.873684		4.39642	0.875036		4.39642	0.87683		4.39642	0.875229		4.39642	0.876623		4.39642	0.876588		4.39642	0.876332		4.39642	0.877251		4.39642	0.875306		4.39642	0.877175		4.39642	0.875642
4.47094	0.874119		4.47094	0.871301		4.47094	0.873921		4.47094	0.87332		4.47094	0.873868		4.47094	0.873104		4.47094	0.874629		4.47094	0.87494		4.47094	0.875653		4.47094	0.874193		4.47094	0.876024		4.47094	0.874332		4.47094	0.875978		4.47094	0.87393		4.47094	0.875569		4.47094	0.876342
4.54545	0.872784		4.54545	0.871198		4.54545	0.872386		4.54545	0.871616		4.54545	0.874432		4.54545	0.872945		4.54545	0.874211		4.54545	0.873729		4.54545	0.873735		4.54545	0.874063		4.54545	0.874212		4.54545	0.874509		4.54545	0.874591		4.54545	0.873679		4.54545	0.875062		4.54545	0.876527
4.61997	0.869478		4.61997	0.870981		4.61997	0.870684		4.61997	0.870988		4.61997	0.872122		4.61997	0.870451		4.61997	0.872702		4.61997	0.873904		4.61997	0.873755		4.61997	0.873292		4.61997	0.874271		4.61997	0.874175		4.61997	0.875592		4.61997	0.872545		4.61997	0.875591		4.61997	0.875785
4.69448	0.869686		4.69448	0.870441		4.69448	0.871281		4.69448	0.871538		4.69448	0.870987		4.69448	0.870794		4.69448	0.871056		4.69448	0.873385		4.69448	0.872374		4.69448	0.873423		4.69448	0.874375		4.69448	0.872619		4.69448	0.872013		4.69448	0.8724		4.69448	0.874137		4.69448	0.876229
4.769	0.869594		4.769	0.868503		4.769	0.869408		4.769	0.870267		4.769	0.871008		4.769	0.870123		4.769	0.871083		4.769	0.872349		4.769	0.87287		4.769	0.871678		4.769	0.872118		4.769	0.872295		4.769	0.872976		4.769	0.871125		4.769	0.87377		4.769	0.87295
4.84351	0.868995		4.84351	0.869078		4.84351	0.868326		4.84351	0.870088		4.84351	0.870283		4.84351	0.868941		4.84351	0.870528		4.84351	0.872323		4.84351	0.87137		4.84351	0.870605		4.84351	0.871457		4.84351	0.872908		4.84351	0.872686		4.84351	0.872068		4.84351	0.871938		4.84351	0.873939
4.91803	0.868171		4.91803	0.868553		4.91803	0.868938		4.91803	0.867816		4.91803	0.869164		4.91803	0.869174		4.91803	0.870881		4.91803	0.870955		4.91803	0.871865		4.91803	0.872184		4.91803	0.871702		4.91803	0.870897		4.91803	0.872506		4.91803	0.870178		4.91803	0.87115		4.91803	0.872494
4.99255	0.867107		4.99255	0.867903		4.99255	0.8688		4.99255	0.868903		4.99255	0.869537		4.99255	0.866772		4.99255	0.869696		4.99255	0.87113		4.99255	0.869312		4.99255	0.869512		4.99255	0.870346		4.99255	0.870161		4.99255	0.871381		4.99255	0.869797		4.99255	0.872762		4.99255	0.872355
5.06706	0.865672		5.06706	0.868398		5.06706	0.867664		5.06706	0.865941		5.06706	0.868059		5.06706	0.867703		5.06706	0.869135		5.06706	0.871028		5.06706	0.868253		5.06706	0.868834		5.06706	0.870024		5.06706	0.870147		5.06706	0.869653		5.06706	0.86795		5.06706	0.87031		5.06706	0.872262
5.14158	0.866072		5.14158	0.865256		5.14158	0.868366		5.14158	0.866844		5.14158	0.866361		5.14158	0.867124		5.14158	0.867275		5.14158	0.871252		5.14158	0.869144		5.14158	0.868392		5.14158	0.870177		5.14158	0.867993		5.14158	0.868895		5.14158	0.869459		5.14158	0.868986		5.14158	0.870858
5.21609	0.866065		5.21609	0.864446		5.21609	0.866532		5.21609	0.865344		5.21609	0.866474		5.21609	0.865726		5.21609	0.868344		5.21609	0.868107		5.21609	0.868045		5.21609	0.867799		5.21609	0.869138		5.21609	0.868402		5.21609	0.868964		5.21609	0.868594		5.21609	0.869851		5.21609	0.870341
5.29061	0.864054		5.29061	0.864333		5.29061	0.86569		5.29061	0.864918		5.29061	0.866665		5.29061	0.86585		5.29061	0.867462		5.29061	0.866762		5.29061	0.866435		5.29061	0.868615		5.29061	0.870318		5.29061	0.867476		5.29061	0.867824		5.29061	0.866696		5.29061	0.86966		5.29061	0.870335
5.36512	0.864582		5.36512	0.864551		5.36512	0.863084		5.36512	0.865166		5.36512	0.866722		5.36512	0.865918		5.36512	0.865535		5.36512	0.868174		5.36512	0.867757		5.36512	0.866701		5.36512	0.867379		5.36512	0.865646		5.36512	0.86868		5.36512	0.867581		5.36512	0.868453		5.36512	0.869094
5.43964	0.86336		5.43964	0.863045		5.43964	0.864619		5.43964	0.863355		5.43964	0.864868		5.43964	0.86499		5.43964	0.866408		5.43964	0.868239		5.43964	0.866153		5.43964	0.86557		5.43964	0.867226		5.43964	0.867725		5.43964	0.86644		5.43964	0.86685		5.43964	0.866505		5.43964	0.868545
5.51415	0.862376		5.51415	0.864198		5.51415	0.862915		5.51415	0.863952		5.51415	0.864286		5.51415	0.864506		5.51415	0.864424		5.51415	0.866118		5.51415	0.8659		5.51415	0.864956		5.51415	0.867072		5.51415	0.865122		5.51415	0.866405		5.51415	0.866324		5.51415	0.86782		5.51415	0.869036
5.58867	0.862138		5.58867	0.862518		5.58867	0.863264		5.58867	0.862458		5.58867	0.864451		5.58867	0.863533		5.58867	0.863937		5.58867	0.867667		5.58867	0.865858		5.58867	0.864879		5.58867	0.867135		5.58867	0.866526		5.58867	0.86584		5.58867	0.864616		5.58867	0.867779		5.58867	0.867875
5.66319	0.86176		5.66319	0.862283		5.66319	0.863433		5.66319	0.863609		5.66319	0.864865		5.66319	0.863628		5.66319	0.866203		5.66319	0.865887		5.66319	0.864747		5.66319	0.863637		5.66319	0.865413		5.66319	0.863733		5.66319	0.86583		5.66319	0.864371		5.66319	0.864927		5.66319	0.868154
5.7377	0.861605		5.7377	0.86032		5.7377	0.86198		5.7377	0.862124		5.7377	0.863648		5.7377	0.863099		5.7377	0.864139		5.7377	0.86411		5.7377	0.864565		5.7377	0.865503		5.7377	0.865082		5.7377	0.863717		5.7377	0.864965		5.7377	0.86402		5.7377	0.86474		5.7377	0.867121
5.81222	0.860308		5.81222	0.859843		5.81222	0.861912		5.81222	0.861331		5.81222	0.86294		5.81222	0.862278		5.81222	0.861528		5.81222	0.86402		5.81222	0.86451		5.81222	0.863631		5.81222	0.864534		5.81222	0.863949		5.81222	0.866127		5.81222	0.864368		5.81222	0.865456		5.81222	0.866534
5.88673	0.860931		5.88673	0.86046		5.88673	0.861098		5.88673	0.860618		5.88673	0.863239		5.88673	0.861973		5.88673	0.863931		5.88673	0.864248		5.88673	0.862634		5.88673	0.863577		5.88673	0.86413		5.88673	0.862466		5.88673	0.865451		5.88673	0.863666		5.88673	0.863334		5.88673	0.864712
5.96125	0.860155		5.96125	0.86108		5.96125	0.86105		5.96125	0.859921		5.96125	0.861191		5.96125	0.861161		5.96125	0.862538		5.96125	0.863719		5.96125	0.862647		5.96125	0.861733		5.96125	0.864537		5.96125	0.860587		5.96125	0.864308		5.96125	0.863506		5.96125	0.863974		5.96125	0.867785
6.03576	0.858993		6.03576	0.86063		6.03576	0.859369		6.03576	0.860073		6.03576	0.860233		6.03576	0.859804		6.03576	0.863634		6.03576	0.86299		6.03576	0.861497		6.03576	0.861676		6.03576	0.863131		6.03576	0.861484		6.03576	0.864093		6.03576	0.863216		6.03576	0.863077		6.03576	0.864866
6.11028	0.85752		6.11028	0.858875		6.11028	0.858983		6.11028	0.86063		6.11028	0.861251		6.11028	0.859544		6.11028	0.862258		6.11028	0.864043		6.11028	0.861082		6.11028	0.862708		6.11028	0.864127		6.11028	0.861281		6.11028	0.863338		6.11028	0.862282		6.11028	0.86245		6.11028	0.864323
6.18479	0.857067		6.18479	0.858338		6.18479	0.859324		6.18479	0.858695		6.18479	0.859314		6.18479	0.858702		6.18479	0.861415		6.18479	0.862351		6.18479	0.860693		6.18479	0.861768		6.18479	0.862393		6.18479	0.859313		6.18479	0.862561		6.18479	0.860619		6.18479	0.862117		6.18479	0.863592
6.25931	0.858367		6.25931	0.85816		6.25931	0.858138		6.25931	0.857648		6.25931	0.859424		6.25931	0.857588		6.25931	0.860759		6.25931	0.86037		6.25931	0.860318		6.25931	0.860883		6.25931	0.861566		6.25931	0.860731		6.25931	0.862321		6.25931	0.860801		6.25931	0.863105		6.25931	0.863067
6.33383	0.856962		6.33383	0.85792		6.33383	0.858298		6.33383	0.85817		6.33383	0.858797		6.33383	0.859739		6.33383	0.86075		6.33383	0.859559		6.33383	0.859653		6.33383	0.859979		6.33383	0.861135		6.33383	0.860358		6.33383	0.860615		6.33383	0.860801		6.33383	0.862402		6.33383	0.862559
6.40834	0.85608		6.40834	0.857898		6.40834	0.85936		6.40834	0.855751		6.40834	0.859167		6.40834	0.857718		6.40834	0.86039		6.40834	0.859466		6.40834	0.858668		6.40834	0.859902		6.40834	0.860189		6.40834	0.859225		6.40834	0.860229		6.40834	0.859812		6.40834	0.86129		6.40834	0.862748
6.48286	0.856258		6.48286	0.856525		6.48286	0.858225		6.48286	0.856801		6.48286	0.858938		6.48286	0.857077		6.48286	0.859054		6.48286	0.860201		6.48286	0.858338		6.48286	0.858877		6.48286	0.860809		6.48286	0.857758		6.48286	0.859901		6.48286	0.859443		6.48286	0.86008		6.48286	0.863012
6.55737	0.855795		6.55737	0.857095		6.55737	0.856101		6.55737	0.856333		6.55737	0.857487		6.55737	0.857189		6.55737	0.857904		6.55737	0.86014		6.55737	0.857171		6.55737	0.858657		6.55737	0.860224		6.55737	0.857748		6.55737	0.858706		6.55737	0.858557		6.55737	0.859592		6.55737	0.860931
6.63189	0.854833		6.63189	0.85613		6.63189	0.856309		6.63189	0.855823		6.63189	0.857965		6.63189	0.857059		6.63189	0.857655		6.63189	0.860248		6.63189	0.85804		6.63189	0.859472		6.63189	0.860656		6.63189	0.858144		6.63189	0.85967		6.63189	0.859162		6.63189	0.860257		6.63189	0.861619
6.7064	0.853721		6.7064	0.85556		6.7064	0.855394		6.7064	0.855578		6.7064	0.857359		6.7064	0.856179		6.7064	0.856562		6.7064	0.85892		6.7064	0.857978		6.7064	0.858759		6.7064	0.858715		6.7064	0.857745		6.7064	0.858984		6.7064	0.858403		6.7064	0.859481		6.7064	0.860728
6.78092	0.854538		6.78092	0.854565		6.78092	0.855433		6.78092	0.856201		6.78092	0.856224		6.78092	0.856031		6.78092	0.858911		6.78092	0.858494		6.78092	0.858493		6.78092	0.857304		6.78092	0.858305		6.78092	0.856851		6.78092	0.858789		6.78092	0.858941		6.78092	0.858597		6.78092	0.860276
6.85544	0.853543		6.85544	0.85516		6.85544	0.853132		6.85544	0.854223		6.85544	0.856257		6.85544	0.855957		6.85544	0.855715		6.85544	0.858564		6.85544	0.857508		6.85544	0.856654		6.85544	0.857801		6.85544	0.857512		6.85544	0.857623		6.85544	0.857427		6.85544	0.859066		6.85544	0.860325
6.92995	0.854623		6.92995	0.854127		6.92995	0.854416		6.92995	0.854035		6.92995	0.855592		6.92995	0.855401		6.92995	0.857295		6.92995	0.857424		6.92995	0.856744		6.92995	0.858186		6.92995	0.858699		6.92995	0.855584		6.92995	0.857879		6.92995	0.857143		6.92995	0.858787		6.92995	0.860038
7.00447	0.853103		7.00447	0.853675		7.00447	0.853983		7.00447	0.853851		7.00447	0.854717		7.00447	0.854565		7.00447	0.856309		7.00447	0.855691		7.00447	0.856459		7.00447	0.85595		7.00447	0.857194		7.00447	0.856409		7.00447	0.858454		7.00447	0.8557		7.00447	0.856883		7.00447	0.858601
7.07898	0.852604		7.07898	0.85365		7.07898	0.8528		7.07898	0.85268		7.07898	0.854374		7.07898	0.85453		7.07898	0.856199		7.07898	0.85635		7.07898	0.85501		7.07898	0.856457		7.07898	0.855939		7.07898	0.855695		7.07898	0.8572		7.07898	0.856381		7.07898	0.85721		7.07898	0.857679
7.1535	0.852209		7.1535	0.853442		7.1535	0.854281		7.1535	0.850811		7.1535	0.852568		7.1535	0.853605		7.1535	0.85524		7.1535	0.855291		7.1535	0.855457		7.1535	0.854011		7.1535	0.855814		7.1535	0.854828		7.1535	0.855712		7.1535	0.85499		7.1535	0.857821		7.1535	0.858773
7.22801	0.853651		7.22801	0.853115		7.22801	0.854245		7.22801	0.85296		7.22801	0.852962		7.22801	0.85359		7.22801	0.855683		7.22801	0.856324		7.22801	0.855966		7.22801	0.856409		7.22801	0.856975		7.22801	0.853908		7.22801	0.854953		7.22801	0.854376		7.22801	0.856737		7.22801	0.856675
7.30253	0.852567		7.30253	0.852152		7.30253	0.852287		7.30253	0.851325		7.30253	0.853589		7.30253	0.853392		7.30253	0.85366		7.30253	0.855294		7.30253	0.854236		7.30253	0.855533		7.30253	0.855804		7.30253	0.853325		7.30253	0.854947		7.30253	0.855694		7.30253	0.856487		7.30253	0.857528
7.37704	0.851618		7.37704	0.85303		7.37704	0.852171		7.37704	0.850722		7.37704	0.853237		7.37704	0.853649		7.37704	0.853942		7.37704	0.856537		7.37704	0.853993		7.37704	0.85326		7.37704	0.854383		7.37704	0.852588		7.37704	0.856416		7.37704	0.854651		7.37704	0.856063		7.37704	0.857603
7.45156	0.849506		7.45156	0.852162		7.45156	0.850647		7.45156	0.850491		7.45156	0.852684		7.45156	0.851226		7.45156	0.853075		7.45156	0.854425		7.45156	0.85526		7.45156	0.853674		7.45156	0.855134		7.45156	0.853207		7.45156	0.854407		7.45156	0.854476		7.45156	0.855679		7.45156	0.856872
7.52608	0.850077		7.52608	0.849895		7.52608	0.850636		7.52608	0.85014		7.52608	0.852216		7.52608	0.851398		7.52608	0.85298		7.52608	0.854696		7.52608	0.853274		7.52608	0.853705		7.52608	0.854424		7.52608	0.853079		7.52608	0.854021		7.52608	0.854207		7.52608	0.854681		7.52608	0.85653
7.60059	0.850678		7.60059	0.84976		7.60059	0.851138		7.60059	0.850044		7.60059	0.851443		7.60059	0.852009		7.60059	0.852846		7.60059	0.853234		7.60059	0.852587		7.60059	0.853088		7.60059	0.853888		7.60059	0.853502		7.60059	0.854461		7.60059	0.853433		7.60059	0.854453		7.60059	0.85532
7.67511	0.850473		7.67511	0.850672		7.67511	0.84949		7.67511	0.849456		7.67511	0.851326		7.67511	0.850851		7.67511	0.853443		7.67511	0.854325		7.67511	0.852881		7.67511	0.852763		7.67511	0.85381		7.67511	0.852745		7.67511	0.85332		7.67511	0.851604		7.67511	0.855176		7.67511	0.855743
7.74962	0.848264		7.74962	0.849807		7.74962	0.849884		7.74962	0.85054		7.74962	0.851264		7.74962	0.850786		7.74962	0.852246		7.74962	0.854349		7.74962	0.85235		7.74962	0.852419		7.74962	0.853845		7.74962	0.85119		7.74962	0.853535		7.74962	0.852517		7.74962	0.851988		7.74962	0.856106
7.82414	0.849744		7.82414	0.849427		7.82414	0.848205		7.82414	0.848845		7.82414	0.850944		7.82414	0.851019		7.82414	0.850324		7.82414	0.852826		7.82414	0.852402		7.82414	0.852056		7.82414	0.85161		7.82414	0.850791		7.82414	0.852878		7.82414	0.850721		7.82414	0.85317		7.82414	0.856089
7.89865	0.848943		7.89865	0.848617		7.89865	0.850518		7.89865	0.849955		7.89865	0.85021		7.89865	0.850517		7.89865	0.851857		7.89865	0.854168		7.89865	0.850694		7.89865	0.852448		7.89865	0.852918		7.89865	0.850342		7.89865	0.851747		7.89865	0.851332		7.89865	0.852593		7.89865	0.855247
7.97317	0.848993		7.97317	0.849097		7.97317	0.848678		7.97317	0.848381		7.97317	0.850195		7.97317	0.85015		7.97317	0.850699		7.97317	0.852371		7.97317	0.851129		7.97317	0.852091		7.97317	0.852298		7.97317	0.849422		7.97317	0.85175		7.97317	0.853113		7.97317	0.852863		7.97317	0.855131
8.04768	0.847966		8.04768	0.849905		8.04768	0.848616		8.04768	0.848597		8.04768	0.849894		8.04768	0.84953		8.04768	0.851385		8.04768	0.852248		8.04768	0.850717		8.04768	0.850333		8.04768	0.851575		8.04768	0.850581		8.04768	0.851001		8.04768	0.851731		8.04768	0.853899		8.04768	0.853518
8.1222	0.847904		8.1222	0.848635		8.1222	0.847943		8.1222	0.847663		8.1222	0.848685		8.1222	0.848827		8.1222	0.85085		8.1222	0.853112		8.1222	0.852301		8.1222	0.852151		8.1222	0.851698		8.1222	0.849985		8.1222	0.850989		8.1222	0.851423		8.1222	0.853424		8.1222	0.853704
8.19672	0.84735		8.19672	0.847477		8.19672	0.848014		8.19672	0.84864		8.19672	0.848153		8.19672	0.848679		8.19672	0.850648		8.19672	0.851431		8.19672	0.849823		8.19672	0.851728		8.19672	0.850245		8.19672	0.848626		8.19672	0.850357		8.19672	0.850398		8.19672	0.85182		8.19672	0.854467
8.27123	0.847621		8.27123	0.848392		8.27123	0.847819		8.27123	0.849171		8.27123	0.849532		8.27123	0.847982		8.27123	0.849493		8.27123	0.851402		8.27123	0.848721		8.27123	0.852069		8.27123	0.851247		8.27123	0.848502		8.27123	0.851036		8.27123	0.851529		8.27123	0.852467		8.27123	0.853071
8.34575	0.847435		8.34575	0.846757		8.34575	0.847011		8.34575	0.846867		8.34575	0.847473		8.34575	0.846684		8.34575	0.849528		8.34575	0.849325		8.34575	0.849787		8.34575	0.850269		8.34575	0.850693		8.34575	0.849137		8.34575	0.850531		8.34575	0.849896		8.34575	0.851361		8.34575	0.853773
8.42026	0.846106		8.42026	0.84626		8.42026	0.847633		8.42026	0.846057		8.42026	0.849013		8.42026	0.848673		8.42026	0.848937		8.42026	0.84875		8.42026	0.848442		8.42026	0.850359		8.42026	0.850255		8.42026	0.848807		8.42026	0.851355		8.42026	0.849721		8.42026	0.851491		8.42026	0.853733
8.49478	0.84592		8.49478	0.845755		8.49478	0.846374		8.49478	0.848464		8.49478	0.847768		8.49478	0.847459		8.49478	0.85017		8.49478	0.849471		8.49478	0.846858		8.49478	0.850811		8.49478	0.850073		8.49478	0.848188		8.49478	0.848543		8.49478	0.849388		8.49478	0.850689		8.49478	0.852853
8.56929	0.846323		8.56929	0.846184		8.56929	0.847107		8.56929	0.846042		8.56929	0.847736		8.56929	0.847317		8.56929	0.848783		8.56929	0.84915		8.56929	0.84946		8.56929	0.848894		8.56929	0.849531		8.56929	0.847906		8.56929	0.848512		8.56929	0.84849		8.56929	0.850838		8.56929	0.851437
8.64381	0.845637		8.64381	0.84653		8.64381	0.846005		8.64381	0.844831		8.64381	0.847336		8.64381	0.845966		8.64381	0.848165		8.64381	0.848788		8.64381	0.84946		8.64381	0.848614		8.64381	0.849982		8.64381	0.848679		8.64381	0.849226		8.64381	0.847462		8.64381	0.850832		8.64381	0.852552
8.71833	0.845895		8.71833	0.845009		8.71833	0.845371		8.71833	0.845347		8.71833	0.847288		8.71833	0.847317		8.71833	0.848429		8.71833	0.849156		8.71833	0.848128		8.71833	0.847751		8.71833	0.848824		8.71833	0.84551		8.71833	0.847899		8.71833	0.847526		8.71833	0.849219		8.71833	0.852024
8.79284	0.844929		8.79284	0.845617		8.79284	0.844805		8.79284	0.844765		8.79284	0.84627		8.79284	0.846959		8.79284	0.849404		8.79284	0.849278		8.79284	0.847101		8.79284	0.846305		8.79284	0.849722		8.79284	0.847228		8.79284	0.848686		8.79284	0.8483		8.79284	0.849704		8.79284	0.852468
8.86736	0.845612		8.86736	0.845272		8.86736	0.844284		8.86736	0.84471		8.86736	0.846336		8.86736	0.845142		8.86736	0.846202		8.86736	0.846924		8.86736	0.847001		8.86736	0.849072		8.86736	0.848674		8.86736	0.845696		8.86736	0.848711		8.86736	0.847795		8.86736	0.84947		8.86736	0.852836
8.94187	0.844009		8.94187	0.844107		8.94187	0.84389		8.94187	0.844664		8.94187	0.846864		8.94187	0.844317		8.94187	0.846377		8.94187	0.848864		8.94187	0.848186		8.94187	0.849009		8.94187	0.849037		8.94187	0.846619		8.94187	0.848815		8.94187	0.847399		8.94187	0.850186		8.94187	0.851672
9.01639	0.843316		9.01639	0.844959		9.01639	0.84494		9.01639	0.843453		9.01639	0.844294		9.01639	0.844444		9.01639	0.847387		9.01639	0.8469		9.01639	0.84712		9.01639	0.848413		9.01639	0.848176		9.01639	0.845133		9.01639	0.849463		9.01639	0.846716		9.01639	0.849045		9.01639	0.851008
9.0909	0.844871		9.0909	0.844654		9.0909	0.844307		9.0909	0.844739		9.0909	0.844664		9.0909	0.845488		9.0909	0.846151		9.0909	0.847735		9.0909	0.847133		9.0909	0.847365		9.0909	0.848574		9.0909	0.845094		9.0909	0.847333		9.0909	0.848133		9.0909	0.847993		9.0909	0.851525
9.16542	0.844616		9.16542	0.844657		9.16542	0.844523		9.16542	0.844422		9.16542	0.844775		9.16542	0.844979		9.16542	0.847203		9.16542	0.848348		9.16542	0.845805		9.16542	0.846114		9.16542	0.848812		9.16542	0.845644		9.16542	0.847356		9.16542	0.846368		9.16542	0.848896		9.16542	0.852529
9.23993	0.843954		9.23993	0.842152		9.23993	0.843346		9.23993	0.843603		9.23993	0.844634		9.23993	0.84354		9.23993	0.846814		9.23993	0.847609		9.23993	0.845572		9.23993	0.846127		9.23993	0.847757		9.23993	0.844851		9.23993	0.846717		9.23993	0.844929		9.23993	0.847575		9.23993	0.849717
9.31445	0.843311		9.31445	0.843939		9.31445	0.843461		9.31445	0.843663		9.31445	0.844888		9.31445	0.844595		9.31445	0.845979		9.31445	0.846157		9.31445	0.845883		9.31445	0.845159		9.31445	0.847832		9.31445	0.843908		9.31445	0.845296		9.31445	0.847151		9.31445	0.847784		9.31445	0.851101
9.38897	0.842264		9.38897	0.843852		9.38897	0.84229		9.38897	0.843513		9.38897	0.842763		9.38897	0.843886		9.38897	0.845569		9.38897	0.84632		9.38897	0.845465		9.38897	0.84598		9.38897	0.848182		9.38897	0.844485		9.38897	0.846762		9.38897	0.846038		9.38897	0.847128		9.38897	0.849316
9.46348	0.842945		9.46348	0.843109		9.46348	0.842174		9.46348	0.842366		9.46348	0.844154		9.46348	0.842766		9.46348	0.84496		9.46348	0.845982		9.46348	0.844593		9.46348	0.84705		9.46348	0.848001		9.46348	0.844642		9.46348	0.846683		9.46348	0.846005		9.46348	0.847626		9.46348	0.848913
9.538	0.841911		9.538	0.841407		9.538	0.841416		9.538	0.84163		9.538	0.843864		9.538	0.843966		9.538	0.846068		9.538	0.845065		9.538	0.844694		9.538	0.846025		9.538	0.845466		9.538	0.845608		9.538	0.845185		9.538	0.846818		9.538	0.846834		9.538	0.850338
9.61251	0.843378		9.61251	0.841984		9.61251	0.842185		9.61251	0.840696		9.61251	0.843294		9.61251	0.842766		9.61251	0.844301		9.61251	0.846979		9.61251	0.844402		9.61251	0.845977		9.61251	0.846862		9.61251	0.844694		9.61251	0.844898		9.61251	0.845207		9.61251	0.846118		9.61251	0.849499
9.68703	0.842439		9.68703	0.842124		9.68703	0.841895		9.68703	0.842415		9.68703	0.84242		9.68703	0.842861		9.68703	0.844853		9.68703	0.845483		9.68703	0.845202		9.68703	0.845117		9.68703	0.846242		9.68703	0.843669		9.68703	0.844702		9.68703	0.845522		9.68703	0.846023		9.68703	0.850602
9.76154	0.841528		9.76154	0.841682		9.76154	0.841568		9.76154	0.841134		9.76154	0.844393		9.76154	0.843582		9.76154	0.845177		9.76154	0.845792		9.76154	0.843543		9.76154	0.844968		9.76154	0.845863		9.76154	0.843663		9.76154	0.846733		9.76154	0.845709		9.76154	0.846938		9.76154	0.849392
9.83606	0.840481		9.83606	0.843372		9.83606	0.841371		9.83606	0.841336		9.83606	0.842975		9.83606	0.842828		9.83606	0.843722		9.83606	0.844677		9.83606	0.843654		9.83606	0.843551		9.83606	0.844333		9.83606	0.844242		9.83606	0.844522		9.83606	0.843617		9.83606	0.845433		9.83606	0.849598
9.91057	0.841312		9.91057	0.842044		9.91057	0.841442		9.91057	0.840304		9.91057	0.842121		9.91057	0.843664		9.91057	0.844025		9.91057	0.845159		9.91057	0.844538		9.91057	0.844359		9.91057	0.84602		9.91057	0.843218		9.91057	0.844762		9.91057	0.844581		9.91057	0.846425		9.91057	0.849128
9.98509	0.842156		9.98509	0.840387		9.98509	0.841568		9.98509	0.840238		9.98509	0.84179		9.98509	0.842781		9.98509	0.842988		9.98509	0.845138		9.98509	0.84492		9.98509	0.84478		9.98509	0.844802		9.98509	0.843077		9.98509	0.845394		9.98509	0.844587		9.98509	0.845161		9.98509	0.848426
10.0596	0.840809		10.0596	0.841264		10.0596	0.840974		10.0596	0.839819		10.0596	0.841853		10.0596	0.840281		10.0596	0.843983		10.0596	0.844316		10.0596	0.843326		10.0596	0.84427		10.0596	0.843841		10.0596	0.844219		10.0596	0.845324		10.0596	0.844442		10.0596	0.845604		10.0596	0.849273
10.1341	0.841107		10.1341	0.840214		10.1341	0.841563		10.1341	0.840558		10.1341	0.840151		10.1341	0.8419		10.1341	0.843436		10.1341	0.843023		10.1341	0.843929		10.1341	0.844738		10.1341	0.844013		10.1341	0.842569		10.1341	0.844891		10.1341	0.843934		10.1341	0.846622		10.1341	0.847987
10.2086	0.840696		10.2086	0.840689		10.2086	0.840498		10.2086	0.841094		10.2086	0.841963		10.2086	0.84214		10.2086	0.843386		10.2086	0.843893		10.2086	0.843884		10.2086	0.843296		10.2086	0.846495		10.2086	0.841842		10.2086	0.843966		10.2086	0.844161		10.2086	0.846216		10.2086	0.847268
10.2832	0.839206		10.2832	0.840464		10.2832	0.840766		10.2832	0.83939		10.2832	0.840477		10.2832	0.839897		10.2832	0.843142		10.2832	0.843811		10.2832	0.843848		10.2832	0.843143		10.2832	0.84612		10.2832	0.843123		10.2832	0.84419		10.2832	0.845116		10.2832	0.84506		10.2832	0.849348
10.3577	0.840095		10.3577	0.841489		10.3577	0.840788		10.3577	0.840039		10.3577	0.841217		10.3577	0.842018		10.3577	0.84354		10.3577	0.844012		10.3577	0.843903		10.3577	0.843535		10.3577	0.84483		10.3577	0.842088		10.3577	0.843125		10.3577	0.844309		10.3577	0.845833		10.3577	0.848281
10.4322	0.839594		10.4322	0.840404		10.4322	0.839681		10.4322	0.83843		10.4322	0.840056		10.4322	0.840624		10.4322	0.842109		10.4322	0.843114		10.4322	0.84215		10.4322	0.84214		10.4322	0.842814		10.4322	0.841004		10.4322	0.844797		10.4322	0.843287		10.4322	0.845164		10.4322	0.847512
10.5067	0.839164		10.5067	0.839389		10.5067	0.839264		10.5067	0.837954		10.5067	0.840178		10.5067	0.841292		10.5067	0.843009		10.5067	0.843718		10.5067	0.842276		10.5067	0.842974		10.5067	0.844013		10.5067	0.842658		10.5067	0.84249		10.5067	0.843526		10.5067	0.843517		10.5067	0.847906
10.5812	0.839319		10.5812	0.838762		10.5812	0.839363		10.5812	0.838822		10.5812	0.84065		10.5812	0.840056		10.5812	0.843056		10.5812	0.842638		10.5812	0.843038		10.5812	0.843188		10.5812	0.842865		10.5812	0.840782		10.5812	0.843928		10.5812	0.843759		10.5812	0.845193		10.5812	0.847384
10.6557	0.840516		10.6557	0.838634		10.6557	0.838828		10.6557	0.837784		10.6557	0.840142		10.6557	0.839126		10.6557	0.843151		10.6557	0.842679		10.6557	0.842043		10.6557	0.841895		10.6557	0.843816		10.6557	0.841142		10.6557	0.843688		10.6557	0.843466		10.6557	0.844109		10.6557	0.847439
10.7302	0.83853		10.7302	0.838181		10.7302	0.839895		10.7302	0.838467		10.7302	0.840462		10.7302	0.839938		10.7302	0.842914		10.7302	0.844205		10.7302	0.841722		10.7302	0.84278		10.7302	0.842708		10.7302	0.840687		10.7302	0.842806		10.7302	0.841736		10.7302	0.84442		10.7302	0.846818
10.8048	0.838565		10.8048	0.840037		10.8048	0.839554		10.8048	0.838735		10.8048	0.840193		10.8048	0.839282		10.8048	0.840775		10.8048	0.841836		10.8048	0.842072		10.8048	0.843127		10.8048	0.842586		10.8048	0.841551		10.8048	0.842516		10.8048	0.842371		10.8048	0.844597		10.8048	0.847694
10.8793	0.838773		10.8793	0.839157		10.8793	0.838464		10.8793	0.839759		10.8793	0.840091		10.8793	0.840783		10.8793	0.841274		10.8793	0.842554		10.8793	0.839762		10.8793	0.843987		10.8793	0.843271		10.8793	0.839551		10.8793	0.842721		10.8793	0.842677		10.8793	0.843586		10.8793	0.845771
10.9538	0.838262		10.9538	0.838649		10.9538	0.838535		10.9538	0.837856		10.9538	0.83862		10.9538	0.838919		10.9538	0.842032		10.9538	0.842078		10.9538	0.842264		10.9538	0.842341		10.9538	0.841941		10.9538	0.840182		10.9538	0.843072		10.9538	0.841356		10.9538	0.844233		10.9538	0.846041
11.0283	0.836777		11.0283	0.839214		11.0283	0.838013		11.0283	0.837048		11.0283	0.838333		11.0283	0.839232		11.0283	0.840659		11.0283	0.842338		11.0283	0.841593		11.0283	0.842895		11.0283	0.843519		11.0283	0.840503		11.0283	0.841514		11.0283	0.84277		11.0283	0.844597		11.0283	0.846821
11.1028	0.837926		11.1028	0.838597		11.1028	0.837492		11.1028	0.837573		11.1028	0.838381		11.1028	0.838993		11.1028	0.840431		11.1028	0.841728		11.1028	0.840206		11.1028	0.842207		11.1028	0.842642		11.1028	0.840605		11.1028	0.842787		11.1028	0.842822		11.1028	0.84249		11.1028	0.846267
11.1773	0.838427		11.1773	0.838577		11.1773	0.836056		11.1773	0.83655		11.1773	0.838092		11.1773	0.839516		11.1773	0.840725		11.1773	0.841267		11.1773	0.841324		11.1773	0.842404		11.1773	0.84365		11.1773	0.841017		11.1773	0.841176		11.1773	0.841186		11.1773	0.844343		11.1773	0.846128
11.2519	0.837318		11.2519	0.837244		11.2519	0.837743		11.2519	0.837965		11.2519	0.838029		11.2519	0.839383		11.2519	0.83997		11.2519	0.841947		11.2519	0.840067		11.2519	0.840806		11.2519	0.842667		11.2519	0.841289		11.2519	0.843091		11.2519	0.840993		11.2519	0.843279		11.2519	0.845698
11.3264	0.836987		11.3264	0.838479		11.3264	0.837729		11.3264	0.83695		11.3264	0.838175		11.3264	0.836921		11.3264	0.839543		11.3264	0.840654		11.3264	0.840167		11.3264	0.841646		11.3264	0.841663		11.3264	0.838238		11.3264	0.840503		11.3264	0.840497		11.3264	0.842769		11.3264	0.845283
11.4009	0.838027		11.4009	0.837937		11.4009	0.836788		11.4009	0.837198		11.4009	0.839411		11.4009	0.838082		11.4009	0.840059		11.4009	0.84246		11.4009	0.839279		11.4009	0.842137		11.4009	0.842423		11.4009	0.837786		11.4009	0.843072		11.4009	0.841755		11.4009	0.842341		11.4009	0.846586
11.4754	0.837521		11.4754	0.838234		11.4754	0.836515		11.4754	0.836653		11.4754	0.838369		11.4754	0.838215		11.4754	0.839379		11.4754	0.840821		11.4754	0.839396		11.4754	0.841481		11.4754	0.842893		11.4754	0.839901		11.4754	0.841704		11.4754	0.840793		11.4754	0.843298		11.4754	0.845524
11.5499	0.837674		11.5499	0.836081		11.5499	0.837982		11.5499	0.836633		11.5499	0.83634		11.5499	0.83792		11.5499	0.839278		11.5499	0.841675		11.5499	0.840617		11.5499	0.84221		11.5499	0.841553		11.5499	0.839046		11.5499	0.841183		11.5499	0.840301		11.5499	0.842329		11.5499	0.846856
11.6244	0.837168		11.6244	0.836954		11.6244	0.837836		11.6244	0.837043		11.6244	0.836889		11.6244	0.838916		11.6244	0.840157		11.6244	0.841471		11.6244	0.841061		11.6244	0.841016		11.6244	0.841566		11.6244	0.838231		11.6244	0.841524		11.6244	0.839793		11.6244	0.843992		11.6244	0.845977
11.6989	0.837248		11.6989	0.837764		11.6989	0.836563		11.6989	0.836913		11.6989	0.836862		11.6989	0.837379		11.6989	0.839462		11.6989	0.840675		11.6989	0.840336		11.6989	0.840516		11.6989	0.841888		11.6989	0.838971		11.6989	0.842077		11.6989	0.840177		11.6989	0.842598		11.6989	0.845231
11.7735	0.837248		11.7735	0.836939		11.7735	0.837982		11.7735	0.836734		11.7735	0.837719		11.7735	0.837654		11.7735	0.838996		11.7735	0.840789		11.7735	0.841398		11.7735	0.840755		11.7735	0.841462		11.7735	0.839989		11.7735	0.842143		11.7735	0.840857		11.7735	0.84159		11.7735	0.844616
11.848	0.836226		11.848	0.836254		11.848	0.837323		11.848	0.834972		11.848	0.835946		11.848	0.839046		11.848	0.839896		11.848	0.840333		11.848	0.839574		11.848	0.840369		11.848	0.842677		11.848	0.838981		11.848	0.83984		11.848	0.841174		11.848	0.841194		11.848	0.845904
11.9225	0.837248		11.9225	0.835889		11.9225	0.836425		11.9225	0.835696		11.9225	0.835644		11.9225	0.837613		11.9225	0.840484		11.9225	0.841524		11.9225	0.840245		11.9225	0.839592		11.9225	0.841306		11.9225	0.838922		11.9225	0.841012		11.9225	0.841126		11.9225	0.843089		11.9225	0.846125
11.997	0.836875		11.997	0.835876		11.997	0.835574		11.997	0.834615		11.997	0.836701		11.997	0.837116		11.997	0.838346		11.997	0.840684		11.997	0.838732		11.997	0.839643		11.997	0.840492		11.997	0.838464		11.997	0.841037		11.997	0.839998		11.997	0.8414		11.997	0.845295
12.0715	0.836404		12.0715	0.836701		12.0715	0.835627		12.0715	0.834018		12.0715	0.83602		12.0715	0.836977		12.0715	0.839587		12.0715	0.839604		12.0715	0.839315		12.0715	0.841372		12.0715	0.840586		12.0715	0.838555		12.0715	0.84063		12.0715	0.84027		12.0715	0.841704		12.0715	0.844552
12.146	0.836341		12.146	0.836309		12.146	0.835937		12.146	0.835108		12.146	0.83665		12.146	0.837577		12.146	0.838351		12.146	0.83963		12.146	0.839934		12.146	0.840194		12.146	0.841791		12.146	0.838522		12.146	0.840715		12.146	0.84008		12.146	0.840767		12.146	0.845318
12.2206	0.835102		12.2206	0.836541		12.2206	0.835467		12.2206	0.835232		12.2206	0.835017		12.2206	0.836853		12.2206	0.837122		12.2206	0.840115		12.2206	0.838634		12.2206	0.838551		12.2206	0.84068		12.2206	0.837147		12.2206	0.840086		12.2206	0.839644		12.2206	0.841708		12.2206	0.845631
12.2951	0.837328		12.2951	0.836586		12.2951	0.83594		12.2951	0.836059		12.2951	0.835835		12.2951	0.836927		12.2951	0.837098		12.2951	0.840558		12.2951	0.839263		12.2951	0.83837		12.2951	0.840846		12.2951	0.837812		12.2951	0.841498		12.2951	0.840092		12.2951	0.84095		12.2951	0.844506
12.3696	0.835257		12.3696	0.836511		12.3696	0.835343		12.3696	0.834837		12.3696	0.83471		12.3696	0.836058		12.3696	0.83855		12.3696	0.839765		12.3696	0.839833		12.3696	0.839455		12.3696	0.840598		12.3696	0.839125		12.3696	0.840699		12.3696	0.839487		12.3696	0.840703		12.3696	0.845074
12.4441	0.835124		12.4441	0.835431		12.4441	0.835059		12.4441	0.83503		12.4441	0.835716		12.4441	0.83654		12.4441	0.837273		12.4441	0.839356		12.4441	0.839373		12.4441	0.839634		12.4441	0.840295		12.4441	0.837491		12.4441	0.841088		12.4441	0.839569		12.4441	0.841765		12.4441	0.845779
12.5186	0.835958		12.5186	0.834671		12.5186	0.833785		12.5186	0.835117		12.5186	0.83625		12.5186	0.835535		12.5186	0.838616		12.5186	0.839225		12.5186	0.839124		12.5186	0.840064		12.5186	0.841137		12.5186	0.837602		12.5186	0.840939		12.5186	0.840787		12.5186	0.84154		12.5186	0.844265
12.5931	0.835117		12.5931	0.834256		12.5931	0.834971		12.5931	0.834217		12.5931	0.834931		12.5931	0.835778		12.5931	0.837232		12.5931	0.838665		12.5931	0.840034		12.5931	0.839497		12.5931	0.840379		12.5931	0.837936		12.5931	0.839792		12.5931	0.838789		12.5931	0.842072		12.5931	0.843371
12.6677	0.834167		12.6677	0.835699		12.6677	0.835199		12.6677	0.835168		12.6677	0.83497		12.6677	0.837181		12.6677	0.837642		12.6677	0.840406		12.6677	0.838929		12.6677	0.838217		12.6677	0.839756		12.6677	0.838116		12.6677	0.839388		12.6677	0.840633		12.6677	0.841422		12.6677	0.843145
12.7422	0.834964		12.7422	0.834774		12.7422	0.835239		12.7422	0.833845		12.7422	0.836444		12.7422	0.835719		12.7422	0.838836		12.7422	0.839152		12.7422	0.837559		12.7422	0.838233		12.7422	0.840169		12.7422	0.835861		12.7422	0.839394		12.7422	0.839067		12.7422	0.840817		12.7422	0.84327
12.8167	0.834503		12.8167	0.835641		12.8167	0.83334		12.8167	0.834076		12.8167	0.835489		12.8167	0.836428		12.8167	0.838072		12.8167	0.838778		12.8167	0.838696		12.8167	0.838229		12.8167	0.840107		12.8167	0.835635		12.8167	0.839281		12.8167	0.840086		12.8167	0.840897		12.8167	0.845443
12.8912	0.834821		12.8912	0.835069		12.8912	0.835267		12.8912	0.833		12.8912	0.835662		12.8912	0.83571		12.8912	0.837645		12.8912	0.838303		12.8912	0.837293		12.8912	0.837787		12.8912	0.839115		12.8912	0.838827		12.8912	0.840585		12.8912	0.838429		12.8912	0.841818		12.8912	0.843229
12.9657	0.834784		12.9657	0.835629		12.9657	0.834523		12.9657	0.833398		12.9657	0.835098		12.9657	0.836841		12.9657	0.837838		12.9657	0.838504		12.9657	0.837439		12.9657	0.837672		12.9657	0.840727		12.9657	0.8383		12.9657	0.840029		12.9657	0.838193		12.9657	0.840554		12.9657	0.843859
13.0402	0.833579		13.0402	0.834389		13.0402	0.834436		13.0402	0.833265		13.0402	0.834713		13.0402	0.837033		13.0402	0.835886		13.0402	0.839435		13.0402	0.838226		13.0402	0.838507		13.0402	0.839403		13.0402	0.836961		13.0402	0.839394		13.0402	0.839654		13.0402	0.840859		13.0402	0.84459
13.1147	0.834318		13.1147	0.835704		13.1147	0.834351		13.1147	0.833081		13.1147	0.833674		13.1147	0.83555		13.1147	0.837698		13.1147	0.83877		13.1147	0.837818		13.1147	0.837933		13.1147	0.838442		13.1147	0.836653		13.1147	0.839022		13.1147	0.838027		13.1147	0.841733		13.1147	0.843661
13.1893	0.835339		13.1893	0.834481		13.1893	0.832557		13.1893	0.833473		13.1893	0.83434		13.1893	0.8356		13.1893	0.837879		13.1893	0.839283		13.1893	0.837701		13.1893	0.83942		13.1893	0.839184		13.1893	0.837052		13.1893	0.838794		13.1893	0.838786		13.1893	0.839667		13.1893	0.843487
13.2638	0.833987		13.2638	0.834394		13.2638	0.833473		13.2638	0.833372		13.2638	0.833988		13.2638	0.836301		13.2638	0.836462		13.2638	0.837121		13.2638	0.837773		13.2638	0.838042		13.2638	0.839929		13.2638	0.836843		13.2638	0.840718		13.2638	0.838765		13.2638	0.839984		13.2638	0.843165
13.3383	0.834776		13.3383	0.834636		13.3383	0.83398		13.3383	0.834102		13.3383	0.834796		13.3383	0.83495		13.3383	0.83689		13.3383	0.839131		13.3383	0.838735		13.3383	0.837271		13.3383	0.840789		13.3383	0.837776		13.3383	0.838661		13.3383	0.838961		13.3383	0.840266		13.3383	0.842956
13.4128	0.834581		13.4128	0.833519		13.4128	0.832816		13.4128	0.833819		13.4128	0.835304		13.4128	0.836301		13.4128	0.83725		13.4128	0.838134		13.4128	0.837293		13.4128	0.837242		13.4128	0.839118		13.4128	0.835556		13.4128	0.839271		13.4128	0.838846		13.4128	0.841213		13.4128	0.843345
13.4873	0.833962		13.4873	0.833646		13.4873	0.833205		13.4873	0.833519		13.4873	0.834334		13.4873	0.83516		13.4873	0.837573		13.4873	0.837883		13.4873	0.837439		13.4873	0.837526		13.4873	0.839065		13.4873	0.834862		13.4873	0.839928		13.4873	0.838849		13.4873	0.839876		13.4873	0.844166
13.5618	0.834673		13.5618	0.833751		13.5618	0.832225		13.5618	0.833153		13.5618	0.833588		13.5618	0.834826		13.5618	0.836471		13.5618	0.837956		13.5618	0.836237		13.5618	0.83829		13.5618	0.838216		13.5618	0.836532		13.5618	0.838652		13.5618	0.838082		13.5618	0.84071		13.5618	0.843536
13.6364	0.833544		13.6364	0.833344		13.6364	0.833323		13.6364	0.833747		13.6364	0.83451		13.6364	0.834761		13.6364	0.83733		13.6364	0.838533		13.6364	0.836801		13.6364	0.837497		13.6364	0.840661		13.6364	0.835749		13.6364	0.8382		13.6364	0.837955		13.6364	0.840548		13.6364	0.843586
13.7109	0.833028		13.7109	0.833171		13.7109	0.833673		13.7109	0.832934		13.7109	0.834486		13.7109	0.834454		13.7109	0.835892		13.7109	0.837556		13.7109	0.839266		13.7109	0.837551		13.7109	0.841447		13.7109	0.836447		13.7109	0.837294		13.7109	0.83784		13.7109	0.840944		13.7109	0.843107
13.7854	0.834563		13.7854	0.833311		13.7854	0.832444		13.7854	0.832902		13.7854	0.834889		13.7854	0.834096		13.7854	0.835993		13.7854	0.837892		13.7854	0.837763		13.7854	0.837765		13.7854	0.838968		13.7854	0.837619		13.7854	0.838077		13.7854	0.838251		13.7854	0.839493		13.7854	0.843368
13.8599	0.833278		13.8599	0.833909		13.8599	0.832811		13.8599	0.832908		13.8599	0.83308		13.8599	0.834921		13.8599	0.83787		13.8599	0.837664		13.8599	0.837766		13.8599	0.836777		13.8599	0.838144		13.8599	0.835468		13.8599	0.83863		13.8599	0.837087		13.8599	0.839943		13.8599	0.843551
13.9344	0.833617		13.9344	0.834019		13.9344	0.834011		13.9344	0.831532		13.9344	0.833155		13.9344	0.834829		13.9344	0.836768		13.9344	0.837606		13.9344	0.835495		13.9344	0.837125		13.9344	0.839781		13.9344	0.836705		13.9344	0.836776		13.9344	0.837005		13.9344	0.839785		13.9344	0.84313
14.0089	0.833331		14.0089	0.833079		14.0089	0.831912		14.0089	0.83257		14.0089	0.833958		14.0089	0.835648		14.0089	0.836439		14.0089	0.837089		14.0089	0.838178		14.0089	0.837615		14.0089	0.839155		14.0089	0.834878		14.0089	0.837559		14.0089	0.838323		14.0089	0.839059		14.0089	0.843229
14.0834	0.832915		14.0834	0.833776		14.0834	0.83236		14.0834	0.831342		14.0834	0.834844		14.0834	0.834421		14.0834	0.836347		14.0834	0.837235		14.0834	0.837685		14.0834	0.837112		14.0834	0.839603		14.0834	0.836296		14.0834	0.838665		14.0834	0.838484		14.0834	0.840884		14.0834	0.842788
14.158	0.832492		14.158	0.833354		14.158	0.833822		14.158	0.83313		14.158	0.833304		14.158	0.835133		14.158	0.837042		14.158	0.837145		14.158	0.836619		14.158	0.836676		14.158	0.838498		14.158	0.835713		14.158	0.839356		14.158	0.8381		14.158	0.839984		14.158	0.843821
14.2325	0.83294		14.2325	0.833451		14.2325	0.832653		14.2325	0.832481		14.2325	0.832958		14.2325	0.834031		14.2325	0.836462		14.2325	0.83776		14.2325	0.836888		14.2325	0.83844		14.2325	0.838266		14.2325	0.835736		14.2325	0.839009		14.2325	0.836912		14.2325	0.839743		14.2325	0.843806
14.307	0.832845		14.307	0.833759		14.307	0.831923		14.307	0.832017		14.307	0.832546		14.307	0.835225		14.307	0.835242		14.307	0.838288		14.307	0.837335		14.307	0.837284		14.307	0.83918		14.307	0.835651		14.307	0.838172		14.307	0.835869		14.307	0.839379		14.307	0.843322
14.3815	0.833894		14.3815	0.832369		14.3815	0.831498		14.3815	0.83313		14.3815	0.834734		14.3815	0.833349		14.3815	0.835369		14.3815	0.835881		14.3815	0.836308		14.3815	0.837586		14.3815	0.839615		14.3815	0.834564		14.3815	0.838696		14.3815	0.837407		14.3815	0.839392		14.3815	0.844407
14.456	0.831924		14.456	0.832356		14.456	0.831394		14.456	0.832423		14.456	0.833588		14.456	0.8336		14.456	0.836896		14.456	0.837346		14.456	0.837617		14.456	0.836048		14.456	0.837625		14.456	0.834741		14.456	0.837423		14.456	0.837994		14.456	0.83917		14.456	0.84221
14.5305	0.832893		14.5305	0.832239		14.5305	0.832346		14.5305	0.831801		14.5305	0.832991		14.5305	0.834708		14.5305	0.835268		14.5305	0.837218		14.5305	0.836985		14.5305	0.836606		14.5305	0.839822		14.5305	0.835733		14.5305	0.83791		14.5305	0.836893		14.5305	0.839921		14.5305	0.842704
14.6051	0.832515		14.6051	0.832129		14.6051	0.831861		14.6051	0.831907		14.6051	0.833808		14.6051	0.833754		14.6051	0.83547		14.6051	0.836357		14.6051	0.836875		14.6051	0.836523		14.6051	0.839803		14.6051	0.8361		14.6051	0.837606		14.6051	0.837634		14.6051	0.839826		14.6051	0.842506
14.6796	0.832402		14.6796	0.832421		14.6796	0.83183		14.6796	0.831602		14.6796	0.833262		14.6796	0.834333		14.6796	0.836875		14.6796	0.837533		14.6796	0.835534		14.6796	0.836061		14.6796	0.838085		14.6796	0.835985		14.6796	0.83729		14.6796	0.837797		14.6796	0.839094		14.6796	0.842309
14.7541	0.833206		14.7541	0.832619		14.7541	0.832678		14.7541	0.831792		14.7541	0.832268		14.7541	0.834457		14.7541	0.835652		14.7541	0.835954		14.7541	0.836509		14.7541	0.837491		14.7541	0.837512		14.7541	0.83497		14.7541	0.838478		14.7541	0.836177		14.7541	0.839135		14.7541	0.842338
14.8286	0.832875		14.8286	0.832959		14.8286	0.830915		14.8286	0.831296		14.8286	0.831838		14.8286	0.834194		14.8286	0.835753		14.8286	0.835995		14.8286	0.835867		14.8286	0.836819		14.8286	0.838542		14.8286	0.834567		14.8286	0.837423		14.8286	0.835881		14.8286	0.839135		14.8286	0.84132
14.9031	0.834836		14.9031	0.833084		14.9031	0.831163		14.9031	0.831555		14.9031	0.832537		14.9031	0.83422		14.9031	0.836287		14.9031	0.837498		14.9031	0.8359		14.9031	0.83694		14.9031	0.837656		14.9031	0.834528		14.9031	0.837869		14.9031	0.836159		14.9031	0.840523		14.9031	0.842872
14.9776	0.832692		14.9776	0.832159		14.9776	0.832118		14.9776	0.831558		14.9776	0.8336		14.9776	0.83271		14.9776	0.835221		14.9776	0.835561		14.9776	0.836525		14.9776	0.837593		14.9776	0.839212		14.9776	0.83384		14.9776	0.836125		14.9776	0.836289		14.9776	0.839046		14.9776	0.842939
15.0522	0.831483		15.0522	0.832541		15.0522	0.83167		15.0522	0.830656		15.0522	0.83322		15.0522	0.834093		15.0522	0.834651		15.0522	0.837302		15.0522	0.837313		15.0522	0.835497		15.0522	0.838025		15.0522	0.834345		15.0522	0.836542		15.0522	0.836924		15.0522	0.840219		15.0522	0.842335
15.1267	0.831182		15.1267	0.832859		15.1267	0.83265		15.1267	0.831475		15.1267	0.833379		15.1267	0.832988		15.1267	0.834404		15.1267	0.836719		15.1267	0.837206		15.1267	0.836848		15.1267	0.83898		15.1267	0.834665		15.1267	0.837758		15.1267	0.837377		15.1267	0.840276		15.1267	0.841572
15.2012	0.832412		15.2012	0.831251		15.2012	0.830622		15.2012	0.830684		15.2012	0.832235		15.2012	0.83428		15.2012	0.834802		15.2012	0.837118		15.2012	0.835903		15.2012	0.835787		15.2012	0.837218		15.2012	0.834973		15.2012	0.837464		15.2012	0.836748		15.2012	0.840301		15.2012	0.842385
15.2757	0.83266		15.2757	0.831281		15.2757	0.83085		15.2757	0.830096		15.2757	0.832086		15.2757	0.833473		15.2757	0.835384		15.2757	0.83767		15.2757	0.836606		15.2757	0.837016		15.2757	0.837371		15.2757	0.834256		15.2757	0.836447		15.2757	0.836748		15.2757	0.838432		15.2757	0.842219
15.3502	0.831803		15.3502	0.833054		15.3502	0.831574		15.3502	0.830777		15.3502	0.832704		15.3502	0.833869		15.3502	0.834716		15.3502	0.836132		15.3502	0.836664		15.3502	0.83586		15.3502	0.838348		15.3502	0.836159		15.3502	0.837082		15.3502	0.837286		15.3502	0.84063		15.3502	0.842913
15.4247	0.83138		15.4247	0.831299		15.4247	0.831611		15.4247	0.830858		15.4247	0.834331		15.4247	0.832374		15.4247	0.83487		15.4247	0.835937		15.4247	0.834701		15.4247	0.837013		15.4247	0.837979		15.4247	0.834027		15.4247	0.836002		15.4247	0.837075		15.4247	0.840589		15.4247	0.842292
15.4992	0.832084		15.4992	0.831819		15.4992	0.831171		15.4992	0.830001		15.4992	0.833208		15.4992	0.833842		15.4992	0.83501		15.4992	0.835674		15.4992	0.834931		15.4992	0.835755		15.4992	0.838673		15.4992	0.833015		15.4992	0.837676		15.4992	0.836343		15.4992	0.840706		15.4992	0.840937
15.5738	0.831518		15.5738	0.830776		15.5738	0.829402		15.5738	0.830809		15.5738	0.833047		15.5738	0.832808		15.5738	0.834823		15.5738	0.836275		15.5738	0.835848		15.5738	0.836695		15.5738	0.837274		15.5738	0.834941		15.5738	0.836779		15.5738	0.836724		15.5738	0.839873		15.5738	0.842393
15.6483	0.830932		15.6483	0.830594		15.6483	0.831371		15.6483	0.830843		15.6483	0.831319		15.6483	0.833777		15.6483	0.835307		15.6483	0.836725		15.6483	0.835449		15.6483	0.835682		15.6483	0.839863		15.6483	0.835481		15.6483	0.834959		15.6483	0.835944		15.6483	0.841083		15.6483	0.842991
15.7228	0.83107		15.7228	0.832319		15.7228	0.830954		15.7228	0.832083		15.7228	0.831889		15.7228	0.834259		15.7228	0.835105		15.7228	0.836389		15.7228	0.835955		15.7228	0.835813		15.7228	0.838417		15.7228	0.833631		15.7228	0.834902		15.7228	0.837105		15.7228	0.842281		15.7228	0.842768
15.7973	0.832402		15.7973	0.831766		15.7973	0.83012		15.7973	0.830661		15.7973	0.832853		15.7973	0.833733		15.7973	0.834811		15.7973	0.836765		15.7973	0.835514		15.7973	0.837363		15.7973	0.836798		15.7973	0.835841		15.7973	0.837546		15.7973	0.836676		15.7973	0.84115		15.7973	0.842852
15.8718	0.832354		15.8718	0.832006		15.8718	0.831084		15.8718	0.830595		15.8718	0.833453		15.8718	0.83297		15.8718	0.834443		15.8718	0.836891		15.8718	0.835984		15.8718	0.837054		15.8718	0.837988		15.8718	0.833474		15.8718	0.836965		15.8718	0.835899		15.8718	0.841346		15.8718	0.843406
15.9463	0.831543		15.9463	0.832621		15.9463	0.82972		15.9463	0.830722		15.9463	0.832065		15.9463	0.832867		15.9463	0.834704		15.9463	0.837043		15.9463	0.835417		15.9463	0.836567		15.9463	0.837243		15.9463	0.832894		15.9463	0.836905		15.9463	0.836812		15.9463	0.842446		15.9463	0.842547
16.0209	0.832845		16.0209	0.831199		16.0209	0.831039		16.0209	0.831896		16.0209	0.832797		16.0209	0.833706		16.0209	0.833748		16.0209	0.836415		16.0209	0.835718		16.0209	0.836338		16.0209	0.836113		16.0209	0.836145		16.0209	0.83579		16.0209	0.837259		16.0209	0.842281		16.0209	0.841862
16.0954	0.831621		16.0954	0.831759		16.0954	0.830602		16.0954	0.830494		16.0954	0.832018		16.0954	0.833408		16.0954	0.833424		16.0954	0.837232		16.0954	0.836221		16.0954	0.835857		16.0954	0.837972		16.0954	0.834571		16.0954	0.836302		16.0954	0.836706		16.0954	0.842101		16.0954	0.842611
16.1699	0.83142		16.1699	0.831841		16.1699	0.830428		16.1699	0.829975		16.1699	0.832623		16.1699	0.833044		16.1699	0.834374		16.1699	0.836272		16.1699	0.837633		16.1699	0.836363		16.1699	0.837897		16.1699	0.835631		16.1699	0.835464		16.1699	0.835835		16.1699	0.842357		16.1699	0.84268
16.2444	0.831826		16.2444	0.831636		16.2444	0.831371		16.2444	0.830388		16.2444	0.832083		16.2444	0.833381		16.2444	0.834722		16.2444	0.836888		16.2444	0.835563		16.2444	0.836185		16.2444	0.836276		16.2444	0.834394		16.2444	0.83694		16.2444	0.836379		16.2444	0.842478		16.2444	0.842857
16.3189	0.831698		16.3189	0.830854		16.3189	0.830788		16.3189	0.829733		16.3189	0.830394		16.3189	0.833118		16.3189	0.83444		16.3189	0.836973		16.3189	0.836		16.3189	0.835545		16.3189	0.838091		16.3189	0.834682		16.3189	0.836709		16.3189	0.836213		16.3189	0.841929		16.3189	0.841291
16.3934	0.831721		16.3934	0.832199		16.3934	0.829695		16.3934	0.829776		16.3934	0.832707		16.3934	0.832832		16.3934	0.834167		16.3934	0.835849		16.3934	0.836078		16.3934	0.835332		16.3934	0.836842		16.3934	0.833192		16.3934	0.834488		16.3934	0.835896		16.3934	0.844315		16.3934	0.84217
16.4679	0.83147		16.4679	0.832371		16.4679	0.829791		16.4679	0.830166		16.4679	0.830665		16.4679	0.833647		16.4679	0.834743		16.4679	0.835797		16.4679	0.836995		16.4679	0.833654		16.4679	0.835728		16.4679	0.832406		16.4679	0.837657		16.4679	0.836077		16.4679	0.844378		16.4679	0.840411
16.5425	0.83129		16.5425	0.831129		16.5425	0.830518		16.5425	0.829442		16.5425	0.831552		16.5425	0.833275		16.5425	0.83564		16.5425	0.836964		16.5425	0.835858		16.5425	0.836029		16.5425	0.837327		16.5425	0.8346		16.5425	0.836232		16.5425	0.835645		16.5425	0.845386		16.5425	0.842457
16.617	0.831383		16.617	0.831839		16.617	0.829971		16.617	0.829283		16.617	0.831904		16.617	0.832119		16.617	0.833721		16.617	0.836608		16.617	0.835731		16.617	0.835367		16.617	0.83749		16.617	0.833143		16.617	0.836564		16.617	0.836271		16.617	0.842522		16.617	0.843139
16.6915	0.831378		16.6915	0.831629		16.6915	0.830543		16.6915	0.830806		16.6915	0.830749		16.6915	0.83279		16.6915	0.835028		16.6915	0.836506		16.6915	0.8353		16.6915	0.835927		16.6915	0.837572		16.6915	0.834129		16.6915	0.836636		16.6915	0.836552		16.6915	0.843814		16.6915	0.842744
16.766	0.831458		16.766	0.831596		16.766	0.830264		16.766	0.830217		16.766	0.832707		16.766	0.832199		16.766	0.835072		16.766	0.835922		16.766	0.835524		16.766	0.836545		16.766	0.838076		16.766	0.834204		16.766	0.837805		16.766	0.834823		16.766	0.844838		16.766	0.842123
16.8405	0.831871		16.8405	0.832491		16.8405	0.82954		16.8405	0.829652		16.8405	0.831083		16.8405	0.833334		16.8405	0.834247		16.8405	0.837133		16.8405	0.836198		16.8405	0.836717		16.8405	0.837274		16.8405	0.832203		16.8405	0.836194		16.8405	0.836951		16.8405	0.845788		16.8405	0.841618
16.915	0.829517		16.915	0.830641		16.915	0.829858		16.915	0.830829		16.915	0.832916		16.915	0.833148		16.915	0.835854		16.915	0.836564		16.915	0.836794		16.915	0.835475		16.915	0.837738		16.915	0.834145		16.915	0.837436		16.915	0.835599		16.915	0.845617		16.915	0.84277
16.9896	0.83109		16.9896	0.831744		16.9896	0.830016		16.9896	0.829612		16.9896	0.831441		16.9896	0.832252		16.9896	0.834336		16.9896	0.835543		16.9896	0.834299		16.9896	0.834513		16.9896	0.837825		16.9896	0.833782		16.9896	0.835695		16.9896	0.8366		16.9896	0.845196		16.9896	0.842501
17.0641	0.831583		17.0641	0.831514		17.0641	0.829408		17.0641	0.831616		17.0641	0.831955		17.0641	0.833165		17.0641	0.834665		17.0641	0.836882		17.0641	0.835511		17.0641	0.835889		17.0641	0.8376		17.0641	0.832514		17.0641	0.835622		17.0641	0.835802		17.0641	0.845757		17.0641	0.841302
17.1386	0.831751		17.1386	0.831169		17.1386	0.830842		17.1386	0.830163		17.1386	0.831555		17.1386	0.832932		17.1386	0.83468		17.1386	0.837022		17.1386	0.835897		17.1386	0.835259		17.1386	0.838038		17.1386	0.83422		17.1386	0.835695		17.1386	0.836322		17.1386	0.847566		17.1386	0.843635
17.2131	0.832309		17.2131	0.830976		17.2131	0.830013		17.2131	0.830235		17.2131	0.831689		17.2131	0.833813		17.2131	0.833198		17.2131	0.836249		17.2131	0.835456		17.2131	0.836102		17.2131	0.8379		17.2131	0.833791		17.2131	0.835723		17.2131	0.83576		17.2131	0.84742		17.2131	0.841749
17.2876	0.831092		17.2876	0.831356		17.2876	0.830089		17.2876	0.83048		17.2876	0.832403		17.2876	0.833892		17.2876	0.834971		17.2876	0.836194		17.2876	0.833188		17.2876	0.835647		17.2876	0.836917		17.2876	0.833955		17.2876	0.836829		17.2876	0.834502		17.2876	0.847185		17.2876	0.840829
17.3621	0.832983		17.3621	0.830411		17.3621	0.830935		17.3621	0.829546		17.3621	0.830967		17.3621	0.832672		17.3621	0.833415		17.3621	0.836135		17.3621	0.836114		17.3621	0.835361		17.3621	0.837615		17.3621	0.832606		17.3621	0.835566		17.3621	0.836649		17.3621	0.847018		17.3621	0.841366
17.4366	0.830351		17.4366	0.830856		17.4366	0.82974		17.4366	0.830062		17.4366	0.832474		17.4366	0.832063		17.4366	0.833546		17.4366	0.8358		17.4366	0.836136		17.4366	0.83466		17.4366	0.83847		17.4366	0.834224		17.4366	0.835553		17.4366	0.834738		17.4366	0.846891		17.4366	0.841262
17.5112	0.83117		17.5112	0.830381		17.5112	0.829892		17.5112	0.829266		17.5112	0.830841		17.5112	0.832598		17.5112	0.834039		17.5112	0.835881		17.5112	0.835537		17.5112	0.835418		17.5112	0.836063		17.5112	0.833412		17.5112	0.836226		17.5112	0.836757		17.5112	0.847702		17.5112	0.841279
17.5857	0.831921		17.5857	0.831111		17.5857	0.830112		17.5857	0.830708		17.5857	0.832095		17.5857	0.83235		17.5857	0.834071		17.5857	0.836477		17.5857	0.835135		17.5857	0.836179		17.5857	0.838088		17.5857	0.831738		17.5857	0.836728		17.5857	0.83546		17.5857	0.847518		17.5857	0.842503
17.6602	0.830962		17.6602	0.832116		17.6602	0.830163		17.6602	0.829473		17.6602	0.830746		17.6602	0.832099		17.6602	0.833768		17.6602	0.836707		17.6602	0.837326		17.6602	0.834638		17.6602	0.838379		17.6602	0.832573		17.6602	0.837366		17.6602	0.836156		17.6602	0.846187		17.6602	0.841537
17.7347	0.831127		17.7347	0.831199		17.7347	0.829977		17.7347	0.829168		17.7347	0.83131		17.7347	0.832025		17.7347	0.833385		17.7347	0.833848		17.7347	0.834516		17.7347	0.835727		17.7347	0.837878		17.7347	0.833762		17.7347	0.836292		17.7347	0.836491		17.7347	0.847547		17.7347	0.841752
17.8092	0.831077		17.8092	0.830594		17.8092	0.830185		17.8092	0.829269		17.8092	0.830388		17.8092	0.832669		17.8092	0.833843		17.8092	0.836768		17.8092	0.83498		17.8092	0.835825		17.8092	0.837928		17.8092	0.83329		17.8092	0.834769		17.8092	0.835406		17.8092	0.84728		17.8092	0.841058
17.8837	0.831515		17.8837	0.830179		17.8837	0.82976		17.8837	0.82945		17.8837	0.832098		17.8837	0.832329		17.8837	0.83457		17.8837	0.835493		17.8837	0.834455		17.8837	0.83466		17.8837	0.837819		17.8837	0.833123		17.8837	0.834975		17.8837	0.835944		17.8837	0.84741		17.8837	0.840951
17.9583	0.832061		17.9583	0.831184		17.9583	0.830261		17.9583	0.829401		17.9583	0.832217		17.9583	0.834194		17.9583	0.835049		17.9583	0.836217		17.9583	0.834902		17.9583	0.834915		17.9583	0.836423		17.9583	0.833926		17.9583	0.835136		17.9583	0.835089		17.9583	0.846675		17.9583	0.841352
18.0328	0.830995		18.0328	0.831204		18.0328	0.830334		18.0328	0.829629		18.0328	0.831143		18.0328	0.83149		18.0328	0.834573		18.0328	0.835406		18.0328	0.83554		18.0328	0.835313		18.0328	0.836016		18.0328	0.833333		18.0328	0.836008		18.0328	0.834405		18.0328	0.846295		18.0328	0.842341
18.1073	0.830429		18.1073	0.830016		18.1073	0.829856		18.1073	0.830001		18.1073	0.831376		18.1073	0.831493		18.1073	0.833638		18.1073	0.835105		18.1073	0.834578		18.1073	0.835475		18.1073	0.83652		18.1073	0.834073		18.1073	0.835329		18.1073	0.835379		18.1073	0.847075		18.1073	0.841326
18.1818	0.832084		18.1818	0.830336		18.1818	0.829298		18.1818	0.830292		18.1818	0.832382		18.1818	0.831851		18.1818	0.833552		18.1818	0.835639		18.1818	0.835041		18.1818	0.834434		18.1818	0.837759		18.1818	0.83313		18.1818	0.835815		18.1818	0.836872		18.1818	0.846659		18.1818	0.84172
18.2563	0.830341		18.2563	0.831939		18.2563	0.830225		18.2563	0.828557		18.2563	0.831328		18.2563	0.832637		18.2563	0.834167		18.2563	0.835969		18.2563	0.836042		18.2563	0.835402		18.2563	0.836611		18.2563	0.832252		18.2563	0.835657		18.2563	0.835436		18.2563	0.845246		18.2563	0.840719
18.3308	0.83111		18.3308	0.830679		18.3308	0.831244		18.3308	0.828663		18.3308	0.829863		18.3308	0.832524		18.3308	0.83256		18.3308	0.836278		18.3308	0.835958		18.3308	0.834619		18.3308	0.836435		18.3308	0.834904		18.3308	0.834962		18.3308	0.835663		18.3308	0.846273		18.3308	0.841357
18.4054	0.831693		18.4054	0.831106		18.4054	0.829985		18.4054	0.829788		18.4054	0.831764		18.4054	0.832007		18.4054	0.834368		18.4054	0.836833		18.4054	0.834766		18.4054	0.835169		18.4054	0.836301		18.4054	0.833467		18.4054	0.83597		18.4054	0.836056		18.4054	0.845405		18.4054	0.842013
18.4799	0.831077		18.4799	0.829726		18.4799	0.829284		18.4799	0.829736		18.4799	0.832728		18.4799	0.831842		18.4799	0.83528		18.4799	0.836465		18.4799	0.834302		18.4799	0.835606		18.4799	0.837124		18.4799	0.832341		18.4799	0.835221		18.4799	0.835294		18.4799	0.844515		18.4799	0.841488
18.5544	0.830288		18.5544	0.829811		18.5544	0.830608		18.5544	0.82956		18.5544	0.8322		18.5544	0.833097		18.5544	0.833578		18.5544	0.834942		18.5544	0.835349		18.5544	0.83537		18.5544	0.837697		18.5544	0.833457		18.5544	0.836033		18.5544	0.835031		18.5544	0.845551		18.5544	0.842652
18.6289	0.831375		18.6289	0.830651		18.6289	0.830625		18.6289	0.830635		18.6289	0.832247		18.6289	0.832081		18.6289	0.832634		18.6289	0.834688		18.6289	0.835702		18.6289	0.835593		18.6289	0.837165		18.6289	0.833094		18.6289	0.836324		18.6289	0.835016		18.6289	0.844607		18.6289	0.842147
18.7034	0.829752		18.7034	0.830334		18.7034	0.829501		18.7034	0.829753		18.7034	0.831385		18.7034	0.832764		18.7034	0.835346		18.7034	0.83547		18.7034	0.835592		18.7034	0.835208		18.7034	0.837957		18.7034	0.833621		18.7034	0.836068		18.7034	0.835999		18.7034	0.844901		18.7034	0.841825
18.7779	0.830328		18.7779	0.831314		18.7779	0.829518		18.7779	0.829678		18.7779	0.83185		18.7779	0.832043		18.7779	0.833347		18.7779	0.836287		18.7779	0.836068		18.7779	0.835122		18.7779	0.838326		18.7779	0.832216		18.7779	0.835471		18.7779	0.835228		18.7779	0.846039		18.7779	0.841819
18.8524	0.83101		18.8524	0.830616		18.8524	0.829743		18.8524	0.830062		18.8524	0.832212		18.8524	0.832832		18.8524	0.833421		18.8524	0.835496		18.8524	0.835122		18.8524	0.835478		18.8524	0.83688		18.8524	0.832583		18.8524	0.837057		18.8524	0.834647		18.8524	0.84517		18.8524	0.841381
18.927	0.831613		18.927	0.830801		18.927	0.830405		18.927	0.829254		18.927	0.831594		18.927	0.833957		18.927	0.834939		18.927	0.835575		18.927	0.836376		18.927	0.836071		18.927	0.836817		18.927	0.832698		18.927	0.835224		18.927	0.836038		18.927	0.84485		18.927	0.842129
19.0015	0.831202		19.0015	0.831086		19.0015	0.828791		19.0015	0.829249		19.0015	0.832701		19.0015	0.832867		19.0015	0.833982		19.0015	0.83596		19.0015	0.836221		19.0015	0.835475		19.0015	0.837374		19.0015	0.833081		19.0015	0.835395		19.0015	0.835204		19.0015	0.846067		19.0015	0.840992
19.076	0.830689		19.076	0.830271		19.076	0.829002		19.076	0.829929		19.076	0.831018		19.076	0.832799		19.076	0.833777		19.076	0.835243		19.076	0.835667		19.076	0.835975		19.076	0.837296		19.076	0.834102		19.076	0.83543		19.076	0.836476		19.076	0.843517		19.076	0.842666
19.1505	0.830734		19.1505	0.830701		19.1505	0.829994		19.1505	0.831068		19.1505	0.830262		19.1505	0.832965		19.1505	0.834193		19.1505	0.836882		19.1505	0.836162		19.1505	0.834482		19.1505	0.837465		19.1505	0.832586		19.1505	0.835379		19.1505	0.834913		19.1505	0.844578		19.1505	0.842414
19.225	0.830902		19.225	0.830824		19.225	0.829827		19.225	0.829557		19.225	0.832403		19.225	0.831921		19.225	0.834214		19.225	0.835368		19.225	0.835048		19.225	0.834545		19.225	0.837988		19.225	0.833212		19.225	0.836352		19.225	0.83485		19.225	0.844413		19.225	0.841595
19.2995	0.830739		19.2995	0.829874		19.2995	0.829098		19.2995	0.82999		19.2995	0.832104		19.2995	0.833455		19.2995	0.834297		19.2995	0.835677		19.2995	0.834328		19.2995	0.835844		19.2995	0.836232		19.2995	0.832917		19.2995	0.836902		19.2995	0.836023		19.2995	0.844793		19.2995	0.84322
19.3741	0.831653		19.3741	0.831254		19.3741	0.829301		19.3741	0.829093		19.3741	0.831898		19.3741	0.832187		19.3741	0.836436		19.3741	0.836016		19.3741	0.835103		19.3741	0.835367		19.3741	0.836795		19.3741	0.833209		19.3741	0.836084		19.3741	0.835464		19.3741	0.8439		19.3741	0.842591
19.4486	0.831067		19.4486	0.830106		19.4486	0.830174		19.4486	0.830079		19.4486	0.831456		19.4486	0.831765		19.4486	0.834665		19.4486	0.835219		19.4486	0.836033		19.4486	0.836472		19.4486	0.836708		19.4486	0.833467		19.4486	0.836043		19.4486	0.835947		19.4486	0.843748		19.4486	0.841085
19.5231	0.831385		19.5231	0.829293		19.5231	0.829422		19.5231	0.829874		19.5231	0.832555		19.5231	0.832583		19.5231	0.833798		19.5231	0.834551		19.5231	0.835624		19.5231	0.835889		19.5231	0.83729		19.5231	0.832681		19.5231	0.835802		19.5231	0.834251		19.5231	0.843719		19.5231	0.841946
19.5976	0.83114		19.5976	0.830754		19.5976	0.829239		19.5976	0.829009		19.5976	0.83197		19.5976	0.832852		19.5976	0.833584		19.5976	0.836147		19.5976	0.835031		19.5976	0.835275		19.5976	0.83678		19.5976	0.832891		19.5976	0.836441		19.5976	0.833704		19.5976	0.844366		19.5976	0.842181
19.6721	0.831833		19.6721	0.830589		19.6721	0.829011		19.6721	0.828995		19.6721	0.831438		19.6721	0.833671		19.6721	0.835301		19.6721	0.835374		19.6721	0.836033		19.6721	0.836246		19.6721	0.836661		19.6721	0.833634		19.6721	0.836219		19.6721	0.836673		19.6721	0.842373		19.6721	0.841598
19.7466	0.830669		19.7466	0.830329		19.7466	0.829684		19.7466	0.828917		19.7466	0.831468		19.7466	0.832796		19.7466	0.832928		19.7466	0.835566		19.7466	0.835436		19.7466	0.836443		19.7466	0.836764		19.7466	0.833827		19.7466	0.836516		19.7466	0.836476		19.7466	0.842813		19.7466	0.842219
19.8211	0.830952		19.8211	0.830961		19.8211	0.828425		19.8211	0.829272		19.8211	0.83194		19.8211	0.833027		19.8211	0.834377		19.8211	0.835152		19.8211	0.835181		19.8211	0.83523		19.8211	0.836661		19.8211	0.833274		19.8211	0.83379		19.8211	0.835875		19.8211	0.8423		19.8211	0.840986
19.8957	0.830927		19.8957	0.831176		19.8957	0.829447		19.8957	0.829107		19.8957	0.831979		19.8957	0.831907		19.8957	0.834244		19.8957	0.83524		19.8957	0.834076		19.8957	0.835376		19.8957	0.837108		19.8957	0.833359		19.8957	0.835322		19.8957	0.835726		19.8957	0.842911		19.8957	0.842977
19.9702	0.831776		19.9702	0.830406		19.9702	0.83032		19.9702	0.830823		19.9702	0.830913		19.9702	0.833402		19.9702	0.833225		19.9702	0.83517		19.9702	0.835553		19.9702	0.835832		19.9702	0.83657		19.9702	0.834728		19.9702	0.83664		19.9702	0.835125		19.9702	0.841996		19.9702	0.842486
20.0447	0.831252		20.0447	0.831134		20.0447	0.829568		20.0447	0.828799		20.0447	0.833068		20.0447	0.832905		20.0447	0.835141		20.0447	0.836083		20.0447	0.834717		20.0447	0.834724		20.0447	0.838661		20.0447	0.832118		20.0447	0.836321		20.0447	0.835811		20.0447	0.843678		20.0447	0.84201
20.1192	0.831315		20.1192	0.830706		20.1192	0.829706		20.1192	0.829263		20.1192	0.831713		20.1192	0.832938		20.1192	0.834363		20.1192	0.835733		20.1192	0.834507		20.1192	0.836242		20.1192	0.836395		20.1192	0.831856		20.1192	0.835193		20.1192	0.835956		20.1192	0.842291		20.1192	0.840722
20.1937	0.830967		20.1937	0.830551		20.1937	0.829675		20.1937	0.829378		20.1937	0.831752		20.1937	0.834034		20.1937	0.833718		20.1937	0.836299		20.1937	0.834818		20.1937	0.83593		20.1937	0.836439		20.1937	0.83332		20.1937	0.835951		20.1937	0.835902		20.1937	0.841914		20.1937	0.843043
20.2682	0.831473		20.2682	0.830786		20.2682	0.83047		20.2682	0.829361		20.2682	0.831552		20.2682	0.831262		20.2682	0.834737		20.2682	0.835202		20.2682	0.834241		20.2682	0.836109		20.2682	0.838357		20.2682	0.832812		20.2682	0.834858		20.2682	0.836712		20.2682	0.843377		20.2682	0.842652
20.3428	0.831187		20.3428	0.831884		20.3428	0.829312		20.3428	0.829958		20.3428	0.832919		20.3428	0.832442		20.3428	0.834107		20.3428	0.836036		20.3428	0.834996		20.3428	0.836274		20.3428	0.835841		20.3428	0.833929		20.3428	0.835701		20.3428	0.835551		20.3428	0.843871		20.3428	0.841517
20.4173	0.83123		20.4173	0.829989		20.4173	0.830833		20.4173	0.829041		20.4173	0.83245		20.4173	0.833405		20.4173	0.833273		20.4173	0.835864		20.4173	0.835109		20.4173	0.835555		20.4173	0.836194		20.4173	0.833356		20.4173	0.8356		20.4173	0.835578		20.4173	0.843422		20.4173	0.841334
20.4918	0.83101		20.4918	0.831176		20.4918	0.829073		20.4918	0.830376		20.4918	0.83105		20.4918	0.833248		20.4918	0.834523		20.4918	0.835706		20.4918	0.834996		20.4918	0.835937		20.4918	0.836855		20.4918	0.832586		20.4918	0.835445		20.4918	0.835113		20.4918	0.842975		20.4918	0.842689
20.5663	0.83138		20.5663	0.832599		20.5663	0.829887		20.5663	0.829104		20.5663	0.832328		20.5663	0.832566		20.5663	0.833347		20.5663	0.83589		20.5663	0.834526		20.5663	0.835157		20.5663	0.836188		20.5663	0.831414		20.5663	0.835584		20.5663	0.836537		20.5663	0.843406		20.5663	0.840258
20.6408	0.830995		20.6408	0.831101		20.6408	0.829442		20.6408	0.83024		20.6408	0.831907		20.6408	0.8329		20.6408	0.8355		20.6408	0.835595		20.6408	0.835148		20.6408	0.835536		20.6408	0.836858		20.6408	0.832852		20.6408	0.836444		20.6408	0.836358		20.6408	0.843038		20.6408	0.84311
20.7153	0.830429		20.7153	0.830104		20.7153	0.83047		20.7153	0.829543		20.7153	0.832068		20.7153	0.832897		20.7153	0.83523		20.7153	0.835482		20.7153	0.836204		20.7153	0.835682		20.7153	0.836745		20.7153	0.83348		20.7153	0.836662		20.7153	0.835711		20.7153	0.843615		20.7153	0.841053
20.7899	0.831823		20.7899	0.830186		20.7899	0.829089		20.7899	0.830477		20.7899	0.831149		20.7899	0.832252		20.7899	0.833733		20.7899	0.835546		20.7899	0.834319		20.7899	0.83495		20.7899	0.836204		20.7899	0.833192		20.7899	0.834362		20.7899	0.835536		20.7899	0.841708		20.7899	0.842945
20.8644	0.830576		20.8644	0.831584		20.8644	0.830244		20.8644	0.829678		20.8644	0.832522		20.8644	0.831936		20.8644	0.833843		20.8644	0.83603		20.8644	0.83497		20.8644	0.834752		20.8644	0.836676		20.8644	0.832521		20.8644	0.835679		20.8644	0.836029		20.8644	0.843124		20.8644	0.842762
20.9389	0.831465		20.9389	0.830874		20.9389	0.830478		20.9389	0.828842		20.9389	0.831686		20.9389	0.831892		20.9389	0.834057		20.9389	0.835753		20.9389	0.835184		20.9389	0.836459		20.9389	0.838044		20.9389	0.833022		20.9389	0.834248		20.9389	0.835506		20.9389	0.842471		20.9389	0.841552
21.0134	0.835314		21.0134	0.835684		21.0134	0.834202		21.0134	0.833879		21.0134	0.834862		21.0134	0.838195		21.0134	0.83831		21.0134	0.839864		21.0134	0.837662		21.0134	0.839819		21.0134	0.841525		21.0134	0.837956		21.0134	0.840525		21.0134	0.840506		21.0134	0.846907		21.0134	0.84728
21.0879	0.851142		21.0879	0.851185		21.0879	0.84907		21.0879	0.850053		21.0879	0.849849		21.0879	0.85161		21.0879	0.85262		21.0879	0.853692		21.0879	0.853345		21.0879	0.855043		21.0879	0.856627		21.0879	0.851747		21.0879	0.854982		21.0879	0.85489		21.0879	0.861895		21.0879	0.86034
21.1624	0.85768		21.1624	0.857143		21.1624	0.857763		21.1624	0.856106		21.1624	0.858072		21.1624	0.859024		21.1624	0.862187		21.1624	0.863002		21.1624	0.861737		21.1624	0.862723		21.1624	0.863182		21.1624	0.859536		21.1624	0.862289		21.1624	0.862209		21.1624	0.870963		21.1624	0.868502
21.2369	0.862975		21.2369	0.864206		21.2369	0.862915		21.2369	0.862628		21.2369	0.864451		21.2369	0.86523		21.2369	0.86715		21.2369	0.867442		21.2369	0.866973		21.2369	0.869395		21.2369	0.868916		21.2369	0.865259		21.2369	0.866835		21.2369	0.869036		21.2369	0.875848		21.2369	0.875091
21.3115	0.86917		21.3115	0.868476		21.3115	0.86691		21.3115	0.86593		21.3115	0.86868		21.3115	0.869878		21.3115	0.871722		21.3115	0.873111		21.3115	0.871606		21.3115	0.872563		21.3115	0.874907		21.3115	0.869538		21.3115	0.872199		21.3115	0.873622		21.3115	0.879773		21.3115	0.879977
21.386	0.873082		21.386	0.871636		21.386	0.871479		21.386	0.870855		21.386	0.872689		21.386	0.874121		21.386	0.874573		21.386	0.876792		21.386	0.875381		21.386	0.876467		21.386	0.877364		21.386	0.873294		21.386	0.876414		21.386	0.876288		21.386	0.88361		21.386	0.881556
21.4605	0.876395		21.4605	0.875276		21.4605	0.875191		21.4605	0.873519		21.4605	0.875076		21.4605	0.877277		21.4605	0.878054		21.4605	0.880956		21.4605	0.879564		21.4605	0.879938		21.4605	0.881658		21.4605	0.876188		21.4605	0.880337		21.4605	0.879335		21.4605	0.88757		21.4605	0.887075
21.535	0.881046		21.535	0.878531		21.535	0.876732		21.535	0.878557		21.535	0.879987		21.535	0.880456		21.535	0.881603		21.535	0.884057		21.535	0.881741		21.535	0.883122		21.535	0.884554		21.535	0.881119		21.535	0.88392		21.535	0.883586		21.535	0.890152		21.535	0.889968
21.6095	0.882125		21.6095	0.881374		21.6095	0.88065		21.6095	0.880027		21.6095	0.881309		21.6095	0.883331		21.6095	0.884479		21.6095	0.88541		21.6095	0.885785		21.6095	0.885823		21.6095	0.887095		21.6095	0.883915		21.6095	0.884994		21.6095	0.886249		21.6095	0.893023		21.6095	0.892884
21.684	0.885088		21.684	0.885437		21.684	0.882972		21.684	0.883753		21.684	0.885929		21.684	0.885199		21.684	0.887535		21.684	0.889346		21.684	0.886362		21.684	0.887539		21.684	0.890197		21.684	0.88548		21.684	0.888526		21.684	0.888668		21.684	0.897388		21.684	0.893975
21.7586	0.887923		21.7586	0.887202		21.7586	0.885707		21.7586	0.885693		21.7586	0.886258		21.7586	0.888931		21.7586	0.889911		21.7586	0.891053		21.7586	0.890425		21.7586	0.890739		21.7586	0.891912		21.7586	0.888329		21.7586	0.890083		21.7586	0.891485		21.7586	0.898931		21.7586	0.897843

## Sheet: 1d
	Dose Response Curve	Dose Response Curve	Dose Response Curve
	Ligand Concentration [M]	Fnorm [‰]	Error Value
	0.0001	872.689	0
	5e-05	872.005	0
	2.5e-05	873.051	0
	1.25e-05	872.618	0
	6.25e-06	874.394	0
	3.125e-06	873.285	0
	1.5625e-06	874.817	0
	7.8125e-07	875.234	0
	3.90625e-07	875.602	0
	1.95313e-07	875.279	0
	9.76563e-08	875.307	0
	4.88281e-08	875.103	0
	2.44141e-08	875.882	0
	1.2207e-08	874.991	0
	6.10352e-09	876.521	0
	3.05176e-09	876.412	0
