# Supplementary material for: Discrimination between cyclic nucleotides in a cyclic nucleotide-gated ion channel
Source: Springer Nature journal article supplement (doi:10.1038/s41594-023-00955-3), 2023-03-27
Supplement: MOESM10 [file 41594_2023_955_MOESM10_ESM.xlsx]

## Sheet: 2a
	0.2 µm/s						0.4 µm/s						1.0 µm/s						2.0 µm/s						4.0 µm/s
		Bin centers	Frequency	Cumulative Sum				Bin centers	Frequency	Cumulative Sum				Bin centers	Frequency	Cumulative Sum				Bin centers	Frequency	Cumulative Sum				Bin centers	Frequency	Cumulative Sum
		17.8133	0.03279	4				28.8514	0.07042	5				22.4	0.02174	1				39.0032	0.00752	1				50.5147	3	3
		22.9028	0.05738	11				34.8492	0.1831	18				27.2	0	1				45.1616	0.06767	10				56.3332	2	5
		27.9922	0.2377	40				40.8469	0.33803	42				32	0.02174	2				51.32	0.15038	30				62.1516	5	10
		33.0817	0.2377	69				46.8447	0.30986	64				36.8	0.13043	8				57.4784	0.18797	55				67.9701	12	22
		38.1713	0.22131	96				52.8425	0.07042	69				41.6	0.06522	11				63.6368	0.27068	91				73.7885	18	40
		43.2608	0.13934	113				58.8403	0.01408	70				46.4	0.23913	22				69.7952	0.15789	112				79.607	15	55
		48.3503	0.05738	120				64.8381	0.01408	71				51.2	0.28261	35				75.9536	0.09774	125				85.4254	6	61
		53.4397	0.0082	121										56	0.13043	41				82.112	0.03759	130				91.2439	6	67
		58.5292	0.0082	122										60.8	0.02174	42				88.2704	0.00752	131				97.0623	3	70
														65.6	0.04348	44				94.4288	0	131				102.881	3	73
														70.4	0.02174	45				100.587	0.01504	133				108.699	1	74
														75.2	0.02174	46										114.518	1	75

## Sheet: 2b
	0.2 µm/s						0.4 µm/s						1.0 µm/s						2.0 µm/s						4.0 µm/s
		Bin centers	Frequency	Cumulative Sum				Bin centers	Frequency	Cumulative Sum				Bin centers	Frequency	Cumulative Sum				Bin centers	Frequency	Cumulative Sum				Bin centers	Frequency	Cumulative Sum
		12.6	0	0				22.2	0.00965	5				22.35	0.00253	1				32.45	0	0				42.95	0	0
		17.8	0.00676	2				26.6	0.01931	15				27.05	0.00506	3				37.35	0.0087	4				48.85	0.00873	2
		23	0.02703	10				31	0.06371	48				31.75	0.01519	9				42.25	0.01304	10				54.75	0.01747	6
		28.2	0.0777	33				35.4	0.07143	85				36.45	0.04304	26				47.15	0.02826	23				60.65	0.03057	13
		33.4	0.13176	72				39.8	0.10811	141				41.15	0.09873	65				52.05	0.05435	48				66.55	0.04803	24
		38.6	0.15203	117				44.2	0.10811	197				45.85	0.10633	107				56.95	0.09783	93				72.45	0.06987	40
		43.8	0.15878	164				48.6	0.13514	267				50.55	0.10127	147				61.85	0.12609	151				78.35	0.131	70
		49	0.15541	210				53	0.13514	337				55.25	0.12911	198				66.75	0.13261	212				84.25	0.08734	90
		54.2	0.08784	236				57.4	0.09073	384				59.95	0.12911	249				71.65	0.11522	265				90.15	0.13974	122
		59.4	0.06419	255				61.8	0.08301	427				64.65	0.0962	287				76.55	0.10435	313				96.05	0.10044	145
		64.6	0.03716	266				66.2	0.04826	452				69.35	0.06329	312				81.45	0.08696	353				101.95	0.0786	163
		69.8	0.03041	275				70.6	0.03089	468				74.05	0.04557	330				86.35	0.0587	380				107.85	0.0655	178
		75	0.02703	283				75	0.02317	480				78.75	0.03544	344				91.25	0.04783	402				113.75	0.04803	189
		80.2	0.01014	286				79.4	0.01737	489				83.45	0.04051	360				96.15	0.04348	422				119.65	0.04367	199
		85.4	0.01014	289				83.8	0.01931	499				88.15	0.02785	371				101.05	0.03478	438				125.55	0.03493	207
		90.6	0.00676	291				88.2	0.01544	507				92.85	0.02025	379				105.95	0.01087	443				131.45	0.0262	213
		95.8	0.00338	292				92.6	0.00772	511				97.55	0.00759	382				110.85	0.01304	449				137.35	0.02183	218
		101	0.00676	294				97	0.00579	514				102.25	0.01266	387				115.75	0.00217	450				143.25	0.01747	222
		106.2	0.00338	295				101.4	0.00193	515				106.95	0.00253	388				120.65	0.0087	454				149.15	0.02183	227
		111.4	0	295				105.8	0.00193	516				111.65	0.00506	390				125.55	0.00652	457				155.05	0	227
		116.6	0	295				110.2	0.00386	518				116.35	0.00759	393				130.45	0	457				160.95	0.00437	228
		121.8	0	295				114.6	0	518				121.05	0.00253	394				135.35	0	457				166.85	0	228
		127	0	295				119	0	518				125.75	0	394				140.25	0.00217	458				172.75	0	228
		132.2	0.00338	296										130.45	0.00253	395				145.15	0	458				178.65	0	228
		137.4	0	296										135.15	0	395				150.05	0	458				184.55	0	228
														139.85	0	395				154.95	0	458				190.45	0	228
																				159.85	0.00217	459				196.35	0	228
																				164.75	0	459				202.25	0	228
																				169.65	0	459				208.15	0	228
																				174.55	0	459				214.05	0.00437	229
																				179.45	0	459				219.95	0	229
																				184.35	0.00217	460
																				189.25	0	460

## Sheet: 2c
	0.2 µm/s						0.4 µm/s						1.0 µm/s						2.0 µm/s						4.0 µm/s
		Bin centers	Frequency	Cumulative Sum				Bin centers	Frequency	Cumulative Sum				Bin centers	Frequency	Cumulative Sum				Bin centers	Frequency	Cumulative Sum				Bin centers	Frequency	Cumulative Sum
		12.5	0.00365	1				22.8622	0.01948	3				26.3032	0.02752	3				33.8421	0.00787	1				42.57	0.0119	1
		17.5	0.08029	23				27.9428	0.12338	22				31.0856	0.0367	7				39.2402	0.03937	6				50.31	0	1
		22.5	0.18978	75				33.0232	0.23377	58				35.868	0.15596	24				44.6383	0.07087	15				58.05	0.03571	4
		27.5	0.31022	160				38.1037	0.23377	94				40.6504	0.21101	47				50.0364	0.17323	37				65.79	0.09524	12
		32.5	0.27372	235				43.1842	0.19481	124				45.4328	0.22936	72				55.4345	0.22047	65				73.53	0.17857	27
		37.5	0.08029	257				48.2647	0.12338	143				50.2152	0.15596	89				60.8327	0.16535	86				81.27	0.21429	45
		42.5	0.04015	268				53.3453	0.03247	148				54.9976	0.08257	98				66.2308	0.13386	103				89.01	0.19048	61
		47.5	0.0073	270				58.4258	0.03896	154				59.78	0.07339	106				71.6289	0.06299	111				96.75	0.16667	75
		52.5	0.01095	273										64.5624	0	106				77.027	0.07874	121				104.49	0.04762	79
		57.5	0.00365	274										69.3448	0.01835	108				82.4251	0.0315	125				112.23	0.0119	80
														74.1272	0	108				87.8233	0.00787	126				119.97	0.0119	81
														78.9096	0.00917	109				93.2214	0.00787	127				127.71	0.02381	83
														83.692	0	109				98.6195	0	127				135.45	0	83
																										143.19	0	83
																										150.93	0	83
																										158.67	0	83
																										166.41	0.0119	84
																										174.15	0	84
																										181.89	0	84

## Sheet: 2d
	0.2 µm/s						0.4 µm/s						1.0 µm/s						2.0 µm/s					4.0 µm/s
		Bin centers	Frequency	Cumulative Sum				Bin centers	Frequency	Cumulative Sum				Bin centers	Frequency	Cumulative Sum				Bin centers	Frequency	Cumulative Sum			Bin centers	Frequency	Cumulative Sum
		12.5	0.0098	3				17.5	0.00299	1				22.5	0	0				27.5	0.00559	1			23.15	0	0
		17.5	0.12092	40				22.5	0.02096	8				27.5	0.00904	3				32.5	0	1			29.45	0.00709	1
		22.5	0.28431	127				27.5	0.11078	45				32.5	0.06928	26				37.5	0.05587	11			35.75	0	1
		27.5	0.27124	210				32.5	0.26347	133				37.5	0.18675	88				42.5	0.10056	29			42.05	0.01418	3
		32.5	0.17974	265				37.5	0.29341	231				42.5	0.25904	174				47.5	0.15084	56			48.35	0.12057	20
		37.5	0.08824	292				42.5	0.17066	288				47.5	0.18976	237				52.5	0.16201	85			54.65	0.23404	53
		42.5	0.02941	301				47.5	0.08982	318				52.5	0.14458	285				57.5	0.21229	123			60.95	0.17021	77
		47.5	0.0098	304				52.5	0.02994	328				57.5	0.08434	313				62.5	0.13966	148			67.25	0.19858	105
		52.5	0.00654	306				57.5	0.00898	331				62.5	0.02711	322				67.5	0.08939	164			73.55	0.09929	119
								62.5	0.00898	334				67.5	0.02108	329				72.5	0.05028	173			79.85	0.0922	132
														72.5	0.00602	331				77.5	0.02235	177			86.15	0.03546	137
														77.5	0.00301	332				82.5	0.01117	179			92.45	0.01418	139
																									98.75	0	139
																									105.05	0.01418	141
																									111.35	0	141

## Sheet: 2e
	0.02 s						0.05 s						0.1 s						0.2 s						0.6 s						0.8 s						1.0 s
		Bin centers	Frequency	Cumulative Sum				Bin centers	Frequency	Cumulative Sum				Bin centers	Frequency	Cumulative Sum				Bin centers	Frequency	Cumulative Sum				Bin centers	Frequency	Cumulative Sum				Bin centers	Frequency	Cumulative Sum				Bin centers	Frequency	Cumulative Sum
		22.5	0.01948	3				22.8	0.02564	1				22.8	0.02632	1				22.8	0.04762	2				17.8	0.01667	1				22.8	0.01449	1				22.8	0.02273	2
		27.5	0.12338	22				28.4	0.20513	9				28.4	0.13158	6				28.4	0.11905	7				23.4	0.1	7				28.4	0.08696	7				28.4	0.11364	12
		32.5	0.23377	58				34	0.28205	20				34	0.21053	14				34	0.28571	19				29	0.21667	20				34	0.24638	24				34	0.20455	30
		37.5	0.23377	94				39.6	0.25641	30				39.6	0.28947	25				39.6	0.21429	28				34.6	0.26667	36				39.6	0.30435	45				39.6	0.21591	49
		42.5	0.19481	124				45.2	0.12821	35				45.2	0.10526	29				45.2	0.16667	35				40.2	0.13333	44				45.2	0.21739	60				45.2	0.17045	64
		47.5	0.12338	143				50.8	0.10256	39				50.8	0.07895	32				50.8	0.04762	37				45.8	0.16667	54				50.8	0.08696	66				50.8	0.14773	77
		52.5	0.03247	148				56.4	0	39				56.4	0.05263	34				56.4	0.09524	41				51.4	0.05	57				56.4	0.02899	68				56.4	0.07955	84
		57.5	0.03896	154										62	0.02632	35				62	0.02381	42				57	0.05	60				62	0	68				62	0.02273	86
														67.6	0.05263	37				67.6	0	42				62.6	0	60				67.6	0.01449	69				67.6	0.01136	87
														73.2	0	37																						73.2	0.01136	88
														78.8	0	37																						78.8	0	88
														84.4	0.02632	38
														90	0	38

## Sheet: 2f
	0.02 s						0.05 s						0.1 s						0.2 s						0.6 s						0.8 s						1.0 s
		Bin centers	Frequency	Cumulative Sum				Bin centers	Frequency	Cumulative Sum				Bin centers	Frequency	Cumulative Sum				Bin centers	Frequency	Cumulative Sum				Bin centers	Frequency	Cumulative Sum				Bin centers	Frequency	Cumulative Sum				Bin centers	Frequency	Cumulative Sum
		27.9	0.07042	5				17.5	0.01681	6				17.5	0.01754	5				12.6	0	0				12.35	0	0				22.35	0.02006	7				12.575	0	0
		33.7	0.1831	18				22.5	0.04762	23				22.5	0.04561	18				17.8	0.00299	1				17.05	0.00629	2				27.05	0.08883	38				17.725	0.00366	1
		39.5	0.33803	42				27.5	0.15966	80				27.5	0.12632	54				23	0.03582	13				21.75	0.04717	17				31.75	0.16046	94				22.875	0.02564	8
		45.3	0.30986	64				32.5	0.22409	160				32.5	0.2	111				28.2	0.09552	45				26.45	0.09748	48				36.45	0.149	146				28.025	0.07326	28
		51.1	0.07042	69				37.5	0.20728	234				37.5	0.18246	163				33.4	0.19701	111				31.15	0.15409	97				41.15	0.11461	186				33.175	0.13919	66
		56.9	0.01408	70				42.5	0.14006	284				42.5	0.18596	216				38.6	0.20896	181				35.85	0.13836	141				45.85	0.11748	227				38.325	0.15018	107
		62.7	0.01408	71				47.5	0.09804	319				47.5	0.12632	252				43.8	0.15522	233				40.55	0.11635	178				50.55	0.12321	270				43.475	0.12454	141
								52.5	0.07563	346				52.5	0.05614	268				49	0.12836	276				45.25	0.14465	224				55.25	0.07163	295				48.625	0.12088	174
								57.5	0.01681	352				57.5	0.03158	277				54.2	0.07164	300				49.95	0.08491	251				59.95	0.05444	314				53.775	0.14286	213
								62.5	0.01401	357				62.5	0.01404	281				59.4	0.05075	317				54.65	0.10063	283				64.65	0.05158	332				58.925	0.08791	237
														67.5	0	281				64.6	0.02687	326				59.35	0.04717	298				69.35	0.01719	338				64.075	0.05861	253
														72.5	0.00702	283				69.8	0.01194	330				64.05	0.0283	307				74.05	0.01433	343				69.225	0.0293	261
														77.5	0.00351	284				75	0.00299	331				68.75	0.01258	311				78.75	0.00287	344				74.375	0.01099	264
														82.5	0.00351	285				80.2	0.00896	334				73.45	0.01258	315				83.45	0.00287	345				79.525	0.01465	268
																				85.4	0	334				78.15	0.00943	318				88.15	0.00573	347				84.675	0.00733	270
																				90.6	0	334				82.85	0	318				92.85	0.00287	348				89.825	0.00733	272
																				95.8	0.00299	335										97.55	0	348				94.975	0.00366	273
																				101	0	335										102.25	0	348				100.125	0	273
																																106.95	0	348
																																111.65	0	348
																																116.35	0.00287	349
																																121.05	0	349
