# Supplementary material for: Discrimination between cyclic nucleotides in a cyclic nucleotide-gated ion channel
Source: Springer Nature journal article supplement (doi:10.1038/s41594-023-00955-3), 2023-03-27
Supplement: MOESM11 [file 41594_2023_955_MOESM11_ESM.xlsx]

## Sheet: Sheet1
		cAMP - simulation	Bin edges	Bin centers	Frequency			cGMP - simulation	Bin edges	Bin centers	Frequency
			-0.684808	-0.622186	0.108263				-1.02473	-0.946761	0.043773
			-0.559563	-0.496941	0.270657				-0.868792	-0.790823	0.087547
			-0.434319	-0.371696	0.541313				-0.712854	-0.634885	0.087547
			-0.309074	-0.246452	0.703707				-0.556916	-0.478946	0.240753
			-0.183829	-0.121207	1.10969				-0.400977	-0.323008	0.59094
			-0.058585	0.004038	1.92166				-0.245039	-0.16707	1.15999
			0.06666	0.129282	1.8946				-0.089101	-0.011132	1.42263
			0.191905	0.254527	1.00143				0.066838	0.144807	1.26943
			0.317149	0.379772	0.351854				0.222776	0.300745	1.20377
			0.442394	0.505016	0.081197				0.378714	0.456683	0.306413
			0.567639						0.534652
		cAMP – experiment	Bin edges	Bin centers	Frequency			cGMP – experiment	Bin edges	Bin centers	Frequency
			-0.656716	-0.598276	0.100458				-0.913158	-0.839003	0.036447
			-0.539835	-0.481394	0.100458				-0.764849	-0.690694	0.048596
			-0.422954	-0.364513	0.334861				-0.616539	-0.542385	0.085043
			-0.306072	-0.247632	0.837151				-0.46823	-0.394076	0.400915
			-0.189191	-0.13075	1.50687				-0.319921	-0.245766	0.959767
			-0.07231	-0.013869	2.411				-0.171612	-0.097457	1.66441
			0.044571	0.103012	1.59059				-0.023302	0.050852	1.96813
			0.161453	0.219893	1.22224				0.125007	0.199162	1.2149
			0.278334	0.336775	0.334861				0.273316	0.347471	0.291575
			0.395215	0.453656	0.117201				0.421625	0.49578	0.072894
			0.512097						0.569935
