# Supplementary material for: Discrimination between cyclic nucleotides in a cyclic nucleotide-gated ion channel
Source: Springer Nature journal article supplement (doi:10.1038/s41594-023-00955-3), 2023-03-27
Supplement: MOESM12 [file 41594_2023_955_MOESM12_ESM.xlsx]

## Sheet: Sheet1
			cAMP											cGMP
					0.02 s contact time	0.05 s contact time	0.2 s contact time	0.6 s contact time	0.8 s contact time	1.0 s contact time					Bond number	0.02 s contact time	0.05 s contact time	0.2 s contact time	0.6 s contact time	0.8 s contact time	1.0 s contact time
						Camp											Camp
				Bond number	Frequency	Frequency	Frequency	Frequency	Frequency	Frequency						Frequency	Frequency	Frequency	Frequency	Frequency	Frequency
				0	0.88069	0.7504	0.53035	0.44031	0.33978	0.27048					0	0.94599	0.82963	0.71985	0.65229	0.58132	0.54859
				1	0.11293	0.21048	0.32867	0.38509	0.4574	0.50356					1	0.04845	0.13333	0.21237	0.2322	0.28814	0.32113
				2	0.0058	0.032	0.12993	0.15659	0.18442	0.19789					2	0.00556	0.03457	0.05751	0.09838	0.11433	0.11912
				3		0.0072	0.01098	0.01791	0.0184	0.02806					3		0.00247	0.01041	0.01908	0.01576	0.01075
